# Supplementary material for: A new method for amino acid geochronology of the shell of the bivalve mollusc Arctica islandica
Source: Copernicus journal article supplement (doi:10.5194/gchron-6-175-2024), 2024-05-23
Supplement: Supplementary file 1 [file gchron-6-175-2024-supplement.zip]

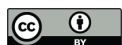

## *Supplement of*

# **A new method for amino acid geochronology of the shell of the bivalve mollusc *Arctica islandica***

**Martina L. G. Conti et al.**

*Correspondence to:* Martina L. G. Conti (martina.conti@york.ac.uk)

- gchron-6-175-2024-supplement-title-page.pdf
- Arctica paper\_Supp Info
  - Fig. S1.pdf
  - Fig. S2.pdf
  - Fig. S3.pdf
  - Fig. S4.pdf
  - Fig. S5.pdf
  - Fig. S6.pdf
  - Fig. S7.pdf
  - Fig. S8.pdf
  - Table S1.pdf
  - Table S2.xlsx

The copyright of individual parts of the supplement might differ from the article licence.
