# Supplementary material for: A new method for amino acid geochronology of the shell of the bivalve mollusc Arctica islandica
Source: Copernicus journal article supplement (doi:10.5194/gchron-6-175-2024), 2024-05-23
Supplement: Supplementary file 1 [file Table S2.xlsx]

## Sheet: Range-finding data
Extent of amino acid racemization (D/L) for free amino acid (FAA) Asx and total hydrolisable amino acid (THAA) fraction Asx and Ser for A. islandica from the North Sea and Iceland
(samples with the same Lab ID are analytical replicates)
All concentrations are reported in pmol/mg.												FAA															THAA															FAA
Shell ID	Sample name (Ar…)	Lab ID	Area	Country	Latitude	Longitude	Layer	Bleach time / h	FAA Asx D/L	THAA Asx D/L	THAA Ser D/L	[Asx]	[Glx]	[Ser]	[Thr]	[His]	[Gly]	[Arg]	[Ala]	[Tyr]	[Val]	[Met]	[Phe]	[Leu]	[Ile]	Total concentration	[Asx]	[Glx]	[Ser]	[Thr]	[His]	[Gly]	[Arg]	[Ala]	[Tyr]	[Val]	[Met]	[Phe]	[Leu]	[Ile]	Total concentration	% Asx	% Glx	% Ser	% Thr	% His	% Gly	% Arg	% Ala
FG22202570	FG22202570	15990	Fladen Ground	UK	59.383	0.5	iOSL	48	0	0.133382	0.249014	9.31563	4.48308	10.6188	4.03664	0	31.9553	0	0	0	0	0	0	0	0	60.4095	775.907	585.792	301.769	389.747	96.2809	499.728	328.155	440.229	2.03187	370.297	0	125.97	176.703	11.3783	4103.99	15.4208	7.42115	17.5781	6.68212	0	52.8979	0	0
FG22202529	FG22202529	15991	Fladen Ground	UK	59.383	0.5	iOSL	48	0	0.134452	0.235782	8.88683	4.15123	15.5799	4.39401	0	35.2656	0	0	0	0	0	0	0	0	68.2775	395.003	286.758	156.896	185.188	34.9023	259.965	170.41	230.784	0	188.363	0	68.1146	90.6084	9.74827	2076.74	13.0157	6.07994	22.8184	6.43552	0	51.6504	0	0
FG22202524	FG22202524	15992	Fladen Ground	UK	59.383	0.5	iOSL	48	0	0.168472	0.316524	7.63096	4.52384	14.4453	4.95366	0	26.8608	0	0	0	0	0	0	0	0	58.4146	285.615	201.72	104.508	132.095	30.582	194.671	104.176	178.885	0	130.9	0	31.0371	72.1182	9.38865	1475.7	13.0635	7.74437	24.729	8.48018	0	45.983	0	0
FG22202530	FG22202530	15993	Fladen Ground	UK	59.383	0.5	iOSL	48	0.191133	0.173752	0.339573	20.8018	10.6572	30.2191	11.203	0	43.88	10.7437	16.509	0	0	0	0	0	0	144.014	467.694	340.465	163.574	209.053	56.0195	271.87	185.543	318.97	0	222.685	0	53.1095	106.441	10.5527	2405.98	14.4443	7.40015	20.9835	7.77909	0	30.4693	7.46016	11.4635
FG22102560	FG22102560	15994	Fladen Ground	UK	59.383	0.5	iOSL	48	0	0.128663	0.255585	3.66052	1.81778	5.17148	0	0	17.7124	0	0	0	0	0	0	0	0	28.3621	536.192	427.498	202.589	249.852	48.3226	316.053	213.986	359.472	0	259.048	0	92.2354	152.521	10.5207	2868.29	12.9064	6.40916	18.2337	0	0	62.4507	0	0
FG22202591	FG22202591	15995	Fladen Ground	UK	59.383	0.5	iOSL	48	0.0548267	0.1374	0.280985	12.6364	5.51182	22.7695	6.74212	0	39.7827	0	0	0	0	0	0	0	0	87.4425	440.223	310.239	156.369	206.717	54.0527	266.61	181.81	267.48	0	203.003	0	54.8668	99.7629	9.74888	2250.88	14.4511	6.30337	26.0394	7.71035	0	45.4958	0	0
FG22202597	FG22202597	15996	Fladen Ground	UK	59.383	0.5	iOSL	48	0	0.130799	0.248404	4.66864	1.86378	4.81816	0	0	18.8023	0	0	0	0	0	0	0	0	30.1528	451.678	329.42	166.828	212.014	55.1148	277.896	229.745	267.188	2.39387	226.085	0	75.0548	104.568	11.5302	2409.51	15.4832	6.1811	15.9791	0	0	62.3566	0	0
FG22202551	FG22202551	15997	Fladen Ground	UK	59.383	0.5	iOSL	48	0	0.135081	0.250402	3.13876	1.66906	3.8394	0	0	15.2576	0	0	0	0	0	0	0	0	23.9048	302.214	216.431	114.321	140.738	31.6592	233.421	127.362	214.321	12.1557	147.141	2.95421	56.952	76.8217	10.1473	1686.64	13.1302	6.98211	16.0612	0	0	63.8265	0	0
FG22202527	FG22202527	15998	Fladen Ground	UK	59.383	0.5	iOSL	48	0.21024	0.191257	0.337574	19.4114	10.0949	28.3722	10.3812	0	40.7001	9.11867	13.5602	0	1.17743	0	1.48419	0	0	134.3	640.282	479.796	238.762	281.382	83.3548	429.257	269.976	419.4	55.5806	292.482	26.069	115.177	147.924	11.1939	3490.64	14.4537	7.51667	21.126	7.72982	0	30.3053	6.78977	10.0969
FG22202598	FG22202598	15999	Fladen Ground	UK	59.383	0.5	iOSL	48	0.193613	0.175366	0.32994	18.1668	8.52178	27.2421	9.45264	0	34.8515	8.89583	13.0106	0	0	0	0	0	0	120.141	1072.23	801.787	389.956	459.706	120.981	1050.01	577.738	737.466	206.032	487.853	109.495	199.779	228.033	11.9135	6452.98	15.1212	7.09313	22.675	7.86794	0	29.0088	7.40448	10.8294
FG22203259	FG22203259	16000	Fladen Ground	UK	59.383	0.5	iOSL	48	0.186677	0.162803	0.293749	18.016	8.64285	26.2479	8.63718	0	45.9741	9.77904	14.5039	0	0	0	0	0	0	131.801	491.261	355.171	164.652	208.867	62.3846	305.222	197.597	353.039	3.99682	228.031	1.89019	88.2846	101.372	9.95255	2571.72	13.6691	6.55751	19.9148	6.5532	0	34.8815	7.41956	11.0044
FG22102586	FG22102586	16001	Fladen Ground	UK	59.383	0.5	iOSL	48	0.191619	0.173515	0.293152	16.0126	7.60879	24.2048	7.7417	0	33.4515	7.05958	11.7177	0	0	0	0	0	0	107.797	476.575	359.016	192.286	218.11	61.6597	304.566	198.225	318.043	39.4191	231.019	14.0859	83.5874	119.378	10.2152	2626.19	14.8545	7.05847	22.4541	7.18176	0	31.032	6.54898	10.8702
FG22202587	FG22202587	16002	Fladen Ground	UK	59.383	0.5	iOSL	48	0.200425	0.17575	0.34197	14.8062	6.44151	20.5942	7.47765	0	29.1212	3.26355	11.4596	0	0	0	0	0	0	93.1638	673.561	486.101	231.685	292.02	47.4803	327.748	310.052	468.482	2.09508	278.844	0	113.996	145.374	12.1994	3389.64	15.8926	6.91418	22.1053	8.02634	0	31.258	3.50302	12.3005
FG22102561	FG22102561	16003	Fladen Ground	UK	59.383	0.5	iOSL	48	0	0.134095	0.237987	4.65659	1.98329	5.30706	0	0	32.7517	0	0	0	0	0	0	0	0	44.6986	421.25	299.23	163.032	211.591	58.7143	305.393	175.113	225.792	18.6042	217.557	2.70243	82.5003	93.4125	9.63413	2284.53	10.4177	4.43703	11.873	0	0	73.2722	0	0
FG22202571	FG22202571	16004	Fladen Ground	UK	59.383	0.5	iOSL	48	0.20068	0.180318	0.344704	37.1297	18.1133	47.5495	18.7623	0	61.5673	29.0581	24.8725	0	3.79607	0	0	0	0	240.849	533.484	395.605	208.346	264.988	73.2538	287.726	275.619	361.398	1.47169	271.787	0	99.59	124.212	11.6318	2909.11	15.4162	7.52061	19.7425	7.79006	0	25.5626	12.0649	10.327
22200228	Ic22200228	16005	Grimsey Island	Iceland	66.527	-18.2	iOSL	48	0.138824	0.155001	0.289807	12.073	5.65057	23.9032	6.71796	0	36.7543	0	0	0	0	0	0	0	0	85.099	582.875	446.523	242.921	286.089	59.781	423.31	257.915	357.262	44.6232	305.63	7.68236	116.688	136.841	10.3441	3278.48	14.187	6.64	28.0887	7.89429	0	43.1901	0	0
22200199	Ic22200199	16006	Grimsey Island	Iceland	66.527	-18.2	iOSL	48	0.319454	0.218649	0.404699	86.6467	46.1897	109.174	51.3239	0	131.778	53.4891	83.023	0	17.0779	0	12.8885	15.1886	11.6768	618.456	1039.1	843.269	452.057	471.354	0	767.314	527.125	621.357	17.8824	478.357	0	231.804	248.476	12.277	5710.37	14.0102	7.46855	17.6526	8.29873	0	21.3075	8.64882	13.4242
22201264	Ic22201264	16007	Grimsey Island	Iceland	66.527	-18.2	iOSL	48	0	0.130968	0.281278	5.90733	2.39674	6.45016	0	0	18.7222	0	0	0	0	0	0	0	0	33.4764	391.261	272.1	201.177	244.589	21.699	245.098	282.891	277.904	2.44699	256.842	0	102.991	107.185	10.3144	2416.5	17.6462	7.15949	19.2678	0	0	55.9265	0	0
22200233	Ic22200233	16008	Grimsey Island	Iceland	66.527	-18.2	iOSL	48	0.295688	0.211896	0.3161	202.303	113.656	240.448	106.097	0	303.728	100.611	174.96	0	34.3757	0	35.3818	31.9305	16.6569	1360.15	1324.83	1084.71	580.744	658.619	43.8474	926.086	645.154	734.489	135.664	633.365	32.8009	298.178	364.178	11.4068	7474.08	14.8736	8.35615	17.6781	7.80041	0	22.3305	7.39706	12.8633
22200191	Ic22200191	16009	Grimsey Island	Iceland	66.527	-18.2	iOSL	48	0.300642	0.20916	0.399226	99.0268	53.4118	127.424	61.9587	0	131.616	83.718	96.963	0	19.6212	0	15.4352	17.1884	12.3061	718.668	539.869	369.402	236.529	296.311	23.1999	347.316	339.185	364.017	41.1214	301.795	0	130.757	141.922	10.3634	3141.79	13.7792	7.43205	17.7305	8.62133	0	18.3138	11.649	13.492
22201280	Ic22201280	16010	Grimsey Island	Iceland	66.527	-18.2	iOSL	48	0	0.135336	0.260681	11.1867	4.6371	15.7733	5.79223	0	34.6421	0	0	0	0	0	0	0	0	72.0314	706.867	492.439	350.288	410.227	37.1221	476.479	467.955	386.037	50.4076	375.05	18.1111	172.357	192.962	8.35037	4144.65	15.5303	6.4376	21.8978	8.04125	0	48.093	0	0
22201253	Ic22201253	16011	Grimsey Island	Iceland	66.527	-18.2	iOSL	48	0	0.14908	0.280464	10.0055	4.0641	27.5244	7.57127	0	35.57	0	0	0	0	0	0	0	0	84.7353	1202.75	860.607	463.307	544.138	46.3781	735.751	483.332	586.719	105.203	549.457	135.856	233.29	243.587	11.1733	6201.55	11.8079	4.79623	32.4829	8.9352	0	41.9778	0	0
22201254	Ic22201254	16012	Grimsey Island	Iceland	66.527	-18.2	iOSL	48	0	0.140266	0.272653	11.8568	4.84351	14.4402	6.0826	0	32.8105	0	0	0	0	0	0	0	0	70.0336	684.835	478.658	300.689	384.97	41.7324	448.78	390.095	393.072	26.7783	390.427	0	151.157	166.064	10.4996	3867.76	16.9302	6.91597	20.619	8.68525	0	46.8496	0	0
22200189	Ic22200189	16013	Grimsey Island	Iceland	66.527	-18.2	iOSL	48	0	0.143336	0.306259	13.6563	6.33674	14.4179	5.28235	0	43.8129	0	0	0	0	0	0	0	0	83.5062	712.328	483.381	354.894	424.166	38.3876	481.751	464.204	535.242	18.8952	439.554	0	175.335	175.942	11.9049	4315.98	16.3536	7.58835	17.2656	6.3257	0	52.4667	0	0
22200120	Ic22200120	16014	Grimsey Island	Iceland	66.527	-18.2	iOSL	48	0	0.111778	0.27162	11.2874	2.23923	10.115	0	0	25.8846	0	0	0	0	0	0	0	0	49.5262	476.865	310.224	265.045	256.718	32.1362	372.166	301.861	291.491	0	233.852	0	118.4	118.081	11.054	2787.89	22.7908	4.52131	20.4235	0	0	52.2644	0	0
22200123	Ic22200123	16015	Grimsey Island	Iceland	66.527	-18.2	iOSL	48	0	0.153915	0.295327	11.7607	5.82639	23.9883	5.75949	0	34.8768	0	0	0	0	0	0	0	0	82.2117	1188.21	943.072	507.941	598.969	46.0799	778.039	543.834	623.542	55.1639	610.145	26.3856	288.647	334.781	10.9897	6555.8	14.3054	7.08706	29.1787	7.00569	0	42.4232	0	0
22200193	Ic22200193	16016	Grimsey Island	Iceland	66.527	-18.2	iOSL	48	0.263461	0.202845	0.378142	66.0477	31.6676	78.717	33.8587	0	86.7629	44.6539	51.807	0	10.3754	0	8.32117	4.85112	0	417.062	976.008	695.435	354.754	433.444	32.8153	610.883	409.114	533.925	79.5077	455.016	7.08646	183.382	215.126	10.7083	4997.2	15.8364	7.59301	18.8741	8.11837	0	20.8033	10.7068	12.4219
22200198	Ic22200198	16017	Grimsey Island	Iceland	66.527	-18.2	iOSL	48	0	0.141229	0.278983	7.94664	1.77147	13.761	3.91892	0	13.388	0	0	0	0	0	0	0	0	40.786	680.035	499.805	270.684	332.643	25.4416	394.894	322.674	380.848	1.12635	329.453	0	140.307	162.478	10.9892	3551.38	19.4838	4.34333	33.7394	9.60851	0	32.825	0	0
22200210	Ic22200210	16018	Grimsey Island	Iceland	66.527	-18.2	iOSL	48	0	0.138894	0.259561	5.33533	2.39623	9.86161	0	0	22.5501	0	0	0	0	0	0	0	0	40.1432	758.579	608.276	358.669	434.261	27.6457	593.571	375.232	415.953	43.2939	420.421	83.685	207.488	210.38	10.2943	4547.75	13.2907	5.96919	24.5661	0	0	56.174	0	0
22200226	Ic22200226	16019	Grimsey Island	Iceland	66.527	-18.2	iOSL	48	0.22301	0.185927	0.358819	58.1662	30.4764	85.7119	31.8948	0	106.73	44.2913	48.595	0	7.7829	0	9.63803	5.07182	0	428.359	712.498	507.307	267.136	361.401	25.2978	432.148	328.595	408.656	9.66066	342.299	0	140.245	158.607	10.2757	3704.13	13.5789	7.11468	20.0094	7.44581	0	24.9161	10.3398	11.3445
22102569	FG22102569	16124	Fladen Ground	UK	59.383	0.5	iOSL	48	0	0.102557	0.245849	4.45668	2.54149	6.38972	0	0	22.8974	0	0	0	0	0	0	0	0	36.2853	438.769	310.091	187.788	185.066	0	345.888	134.663	240.493	19.3533	167.46	0	72.3443	96.1988	9.57307	2207.69	12.2824	7.00419	17.6097	0	0	63.1038	0	0
22202543	FG22202543	16125	Fladen Ground	UK	59.383	0.5	iOSL	48	0	0.107127	0.272221	4.90895	3.02243	7.47405	0	0	14.5888	0	0	0	0	0	0	0	0	29.9942	494.337	347.606	206.084	217.32	0	261.861	249.972	255.253	0	191.658	0	92.7577	106.963	9.89889	2433.71	16.3663	10.0767	24.9183	0	0	48.6386	0	0
22202544	FG22202544	16126	Fladen Ground	UK	59.383	0.5	iOSL	48	0	0.102371	0.254563	4.42233	2.65073	6.42843	0	0	24.2695	0	0	0	0	0	0	0	0	37.771	358.806	262.413	159.593	160.39	14.9095	238.83	155.891	204.255	26.1958	156.271	7.43162	69.7218	85.9643	9.4336	1910.1	11.7083	7.0179	17.0195	0	0	64.2543	0	0
22202572	FG22202572	16127	Fladen Ground	UK	59.383	0.5	iOSL	48	0	0.0890178	0.134593	4.90773	2.46447	4.49205	0	0	23.2209	0	0	0	0	0	0	0	0	35.0852	691.401	586.194	373.818	295.808	46.5904	549.128	333.169	363.718	73.0969	318.187	15.3273	150.133	233.822	9.38756	4039.78	13.9881	7.02426	12.8033	0	0	66.1844	0	0
22202573	FG22202573	16128	Fladen Ground	UK	59.383	0.5	iOSL	48	0	0.100241	0.248323	4.0471	1.97381	6.88024	0	0	18.6786	0	0	0	0	0	0	0	0	31.5798	317.606	235.389	138.757	133.811	13.2818	221.401	141.763	246.951	0	119.618	0	0	88.343	9.70228	1666.62	12.8155	6.25023	21.7869	0	0	59.1474	0	0
22202574	FG22202574	16129	Fladen Ground	UK	59.383	0.5	iOSL	48	0	0.0847558	0.254627	3.81278	2.79539	4.64751	0	0	17.5399	0	0	0	0	0	0	0	0	28.7956	333.29	212.776	136.39	119.304	14.9674	173.141	152.707	165.138	0	78.8306	0	47.0972	60.1442	10.2752	1504.06	13.2408	9.7077	16.1396	0	0	60.9118	0	0
22202575	FG22202575	16130	Fladen Ground	UK	59.383	0.5	iOSL	48	0	0.102624	0.226204	3.53782	2.53615	4.80414	0	0	20.5834	0	0	0	0	0	0	0	0	31.4615	323.125	247.331	144.139	145.255	13.989	265.473	163.066	185.708	0	125.129	0	61.3324	77.9718	10.0099	1762.53	11.2449	8.06111	15.2699	0	0	65.424	0	0
22202576	FG22202576	16131	Fladen Ground	UK	59.383	0.5	iOSL	48	0	0.0977314	0.227389	5.42959	2.52732	5.97483	0	0	21.947	0	0	0	0	0	0	0	0	35.8788	468.354	344.079	219.849	214.445	23.4316	312.474	288.939	257.327	25.5438	195.039	0	95.3113	130.664	10.3428	2585.8	15.1332	7.04406	16.6528	0	0	61.17	0	0
22202577	FG22202577	16132	Fladen Ground	UK	59.383	0.5	iOSL	48	0	0.102288	0.251918	4.61908	2.2409	5.28954	0	0	18.9069	0	0	0	0	0	0	0	0	31.0564	391.733	289.53	158.38	165.621	17.207	281	205.901	241.282	0	144.595	0	70.5178	87.5323	10.4798	2063.78	14.8732	7.21556	17.032	0	0	60.8792	0	0
22202578	FG22202578	16133	Fladen Ground	UK	59.383	0.5	iOSL	48	0	0.101677	0.235229	4.7325	2.16718	5.09394	0	0	19.243	0	0	0	0	0	0	0	0	31.2366	581.038	425.641	250.54	256.097	27.5814	409.159	259.512	301.724	0	218.804	0	62.3509	146.417	9.79732	2948.66	15.1505	6.93796	16.3076	0	0	61.6039	0	0
22202579	FG22202579	16134	Fladen Ground	UK	59.383	0.5	iOSL	48	0	0.10047	0.240864	5.08581	2.95254	7.05364	0	0	23.4986	0	0	0	0	0	0	0	0	38.5905	412.212	288.23	187.451	187.655	19.2801	250.053	227.653	222.184	11.5035	171.61	0	76.3726	89.6214	10.3995	2154.23	13.1789	7.65095	18.2782	0	0	60.892	0	0
22202580	FG22202580	16135	Fladen Ground	UK	59.383	0.5	iOSL	48	0	0.104589	0.245098	4.0581	2.99906	5.0736	0	0	20.2517	0	0	0	0	0	0	0	0	32.3825	280.225	209.331	121.54	123.034	11.0905	182.217	121.963	176.508	0	123.653	0	54.6169	68.7763	9.69118	1482.65	12.5318	9.26136	15.6677	0	0	62.5391	0	0
22202588	FG22202588	16136	Fladen Ground	UK	59.383	0.5	iOSL	48	0	0.0984028	0.268471	9.32825	3.67353	14.6804	6.58977	0	36.4297	0	0	0	0	0	0	0	0	70.7017	476.231	326.991	184.904	196.86	26.6708	318.97	203.574	263.633	0	169.835	0	67.0723	97.76	9.88881	2342.39	13.1938	5.19582	20.7639	9.32053	0	51.5259	0	0
22202589	FG22202589	16137	Fladen Ground	UK	59.383	0.5	iOSL	48	0	0.0923793	0.243838	5.84722	3.90733	7.52586	0	0	25.773	0	0	0	0	0	0	0	0	43.0534	433.141	320.127	183.619	202.189	20.2258	315.717	188.16	269.488	0	174.118	0	80.8865	101.714	9.87949	2299.27	13.5813	9.07556	17.4803	0	0	59.8628	0	0
22202590	FG22202590	16138	Fladen Ground	UK	59.383	0.5	iOSL	48	0	0.100732	0.265423	4.34247	2.85616	6.47444	0	0	22.5888	0	0	0	0	0	0	0	0	36.2618	385.02	275.043	151.173	150.441	10.2342	246.488	121.433	283.325	0	165.732	0	67.9857	87.1863	9.81698	1953.88	11.9753	7.8765	17.8547	0	0	62.2935	0	0
22202592	FG22202592	16139	Fladen Ground	UK	59.383	0.5	iOSL	48	0	0.101228	0.256565	5.09328	2.43708	8.2932	0	0	22.2919	0	0	0	0	0	0	0	0	38.1155	296.847	215.05	129.503	126.945	11.7426	156.349	172.358	215.709	16.0999	125.897	0	56.7216	73.0857	10.2926	1606.6	13.3628	6.39395	21.7581	0	0	58.4852	0	0
22202558	FG22202558	16140	Fladen Ground	UK	59.383	0.5	iOSL	48	0	0.107503	0.264759	6.53106	2.90267	9.00484	5.12892	0	21.0452	0	0	0	0	0	0	0	0	44.6127	437.667	306.818	176.817	181.314	19.0732	287.461	167.525	262.181	0	181.072	0	81.0703	95.8215	9.68947	2206.51	14.6395	6.50638	20.1845	11.4966	0	47.1731	0	0
22202595	FG22202595	16141	Fladen Ground	UK	59.383	0.5	iOSL	48	0	0.101081	0.230887	6.19587	3.63638	7.39707	0	0	30.0456	0	0	0	0	0	0	0	0	47.275	454.663	322.278	184.449	192.849	21.4837	296.124	166.639	255.839	0	200.966	0	81.477	101.1	9.764	2287.63	13.106	7.69197	15.6469	0	0	63.5551	0	0
22202593	FG22202593	16142	Fladen Ground	UK	59.383	0.5	iOSL	48	0	0.104488	0.248119	5.53262	3.23519	7.04221	0	0	24.0399	0	0	0	0	0	0	0	0	39.8499	387.746	285.365	162.719	160.846	14.555	281.064	176.071	245.659	18.0337	157.586	0	69.8344	89.0222	9.89938	2058.4	13.8837	8.11844	17.6718	0	0	60.326	0	0
22202594	FG22202594	16143	Fladen Ground	UK	59.383	0.5	iOSL	48	0	0.104743	0.231971	2.98472	2.14954	3.47043	0	0	17.3498	0	0	0	0	0	0	0	0	25.9545	278.1	198.118	118.361	120.694	11.5137	172.603	154.312	167.566	3.24135	107.859	0	51.3175	65.48	10.6176	1459.78	11.4998	8.28195	13.3712	0	0	66.8471	0	0
22202596	FG22202596	16144	Fladen Ground	UK	59.383	0.5	iOSL	48	0.189919	0.139948	0.347746	18.2182	7.76652	27.4311	9.41781	0	43.1369	10.9073	16.076	0	0	0	0	0	0	132.954	725.375	492.523	252.596	260.64	26.0998	433.535	293.355	482.68	81.6703	291.202	0	119.311	140.707	10.3433	3610.04	13.7027	5.84151	20.632	7.08352	0	32.445	8.20383	12.0914
22202552	FG22202552	16145	Fladen Ground	UK	59.383	0.5	iOSL	48	0	0.0940846	0.213368	3.19416	1.94507	4.16756	0	0	21.0525	0	0	0	0	0	0	0	0	30.3593	450.386	336.133	199.897	195.626	22.2247	378.063	152.948	254.177	41.8557	204.369	28.8562	89.3202	107.009	9.54886	2470.41	10.5212	6.40683	13.7275	0	0	69.3445	0	0
22202553	FG22202553	16146	Fladen Ground	UK	59.383	0.5	iOSL	48	0	0.100328	0.243442	4.94548	2.4257	6.50553	0	0	23.7223	0	0	0	0	0	0	0	0	37.5991	571.499	394.375	227.542	239.421	30.1676	376.549	208.21	280.42	3.75553	244.676	10.9703	104.472	110.928	9.64739	2812.63	13.1532	6.4515	17.3024	0	0	63.0929	0	0
22202541	FG22202541	16147	Fladen Ground	UK	59.383	0.5	iOSL	48	0	0.0918383	0.238499	4.27504	1.98748	5.64818	0	0	21.0458	0	0	0	0	0	0	0	0	32.9565	467.404	337.455	212.394	219.009	27.9065	360.876	226.473	279.576	19.6998	192.055	0	91.4796	108.673	9.94046	2552.94	12.9718	6.03061	17.1383	0	0	63.8593	0	0
22202540	FG22202540	16148	Fladen Ground	UK	59.383	0.5	iOSL	48	0	0.0978248	0.222538	3.39571	1.33557	3.48446	0	0	16.9615	0	0	0	0	0	0	0	0	25.1773	418.703	294.632	177.204	185.829	26.1098	316.871	130.285	234.453	33.1144	186.743	5.60206	79.3727	96.6725	9.66992	2195.26	13.4872	5.30465	13.8397	0	0	67.3684	0	0
22202539	FG22202539	16149	Fladen Ground	UK	59.383	0.5	iOSL	48	0	0.101675	0.244292	3.84917	2.36137	4.33805	0	0	20.8823	0	0	0	0	0	0	0	0	31.4309	473.845	333.606	197.656	198.536	22.7389	323.764	183.527	265.287	38.3383	211.567	0	90.394	101.992	9.80033	2451.05	12.2465	7.51291	13.8019	0	0	66.4387	0	0
22202564	FG22202564	16150	Fladen Ground	UK	59.383	0.5	iOSL	48	0	0.100662	0.25219	4.81127	2.30235	7.41862	0	0	21.8004	0	0	0	0	0	0	0	0	36.3327	419.303	317.614	205.164	196.665	20.5121	368.378	178.336	266.256	0	201.008	0	94.1634	0	9.68905	2277.09	13.2423	6.33685	20.4186	0	0	60.0023	0	0
22202565	FG22202565	16151	Fladen Ground	UK	59.383	0.5	iOSL	48	0	0.0997825	0.240129	3.35651	2.81818	4.66472	0	0	18.0578	0	0	0	0	0	0	0	0	28.8972	334.612	247.22	142.349	145.089	13.1948	250.021	160.383	210.516	10.5306	132.814	0	62.7735	78.3825	10.4994	1798.39	11.6153	9.75242	16.1425	0	0	62.4898	0	0
22202566	FG22202566	16152	Fladen Ground	UK	59.383	0.5	iOSL	48	0	0.0974932	0.235389	3.46729	2.07288	3.79341	0	0	19.0194	0	0	0	0	0	0	0	0	28.353	449.542	325.083	205.513	187.414	18.3446	311.237	198.001	261.75	10.1418	171.578	6.67028	83.1936	101.053	9.89756	2339.42	12.229	7.31099	13.3792	0	0	67.0808	0	0
22202562	FG22202562	16153	Fladen Ground	UK	59.383	0.5	iOSL	48	0	0.0958406	0.25016	5.00788	2.55807	6.11851	0	0	22.247	0	0	0	0	0	0	0	0	35.9314	442.635	309.965	188.74	189.393	22.8599	359.602	235.583	218.518	18.3852	175.363	0	79.8583	101.489	10.0265	2352.42	13.9373	7.11932	17.0283	0	0	61.9151	0	0
22202563	FG22202563	16154	Fladen Ground	UK	59.383	0.5	iOSL	48	0	0.0976166	0.239902	4.08863	2.67616	4.64402	0	0	21.1013	0	0	0	0	0	0	0	0	32.5102	347.727	242.465	149.191	140.921	15.2724	237.184	133.531	206.571	9.16539	146.449	0	61.1797	70.1144	9.75592	1769.53	12.5765	8.23175	14.2848	0	0	64.9069	0	0
22202523	FG22202523	16155	Fladen Ground	UK	59.383	0.5	iOSL	48	0.168255	0.119296	0.296272	7.93986	3.6193	13.9168	4.97939	0	25.7024	0	0	0	0	0	0	0	0	56.1578	333.679	242.501	140.862	138.879	12.6681	222.147	138.272	204.037	0	120.925	0	56.8158	69.3116	9.76813	1689.87	14.1385	6.44488	24.7817	8.86678	0	45.7682	0	0
22202525	FG22202525	16156	Fladen Ground	UK	59.383	0.5	iOSL	48	0	0.100235	0.245227	4.64109	2.74653	5.59076	0	0	18.2541	0	0	0	0	0	0	0	0	31.2325	434.6	309.92	202.997	194.911	16.3866	329.703	199.734	245.642	2.36141	182.021	0	86.1049	99.9265	9.96529	2314.27	14.8598	8.79383	17.9004	0	0	58.4459	0	0
22202526	FG22202526	16157	Fladen Ground	UK	59.383	0.5	iOSL	48	0	0.0941296	0.225	5.05608	2.82855	5.52505	0	0	23.5007	0	0	0	0	0	0	0	0	36.9103	478.237	341.967	206.898	200.656	17.8848	333.032	225.245	237.625	6.97023	184.811	0	88.9622	107.406	10.0579	2439.75	13.6983	7.66329	14.9688	0	0	63.6696	0	0
22202528	FG22202528	16158	Fladen Ground	UK	59.383	0.5	iOSL	48	0.208028	0.150075	0.327243	21.5591	11.3654	35.0138	12.3942	0	48.3173	10.5503	23.3582	0	0	0	0	0	0	162.558	518.593	349.799	232.116	193.09	16.4994	306.78	215.671	347.615	40.6201	155.69	12.3867	78.1326	108.875	10.6436	2586.51	13.2624	6.99156	21.5392	7.62449	0	29.7231	6.49015	14.3691
22202542	FG22202542	16159	Fladen Ground	UK	59.383	0.5	iOSL	48	0	0.104579	0.268448	4.0852	2.38502	5.10653	0	0	20.6641	0	0	0	0	0	0	0	0	32.2409	396.045	271.959	166.37	156.304	6.49745	252.714	170.012	248.407	25.5481	156.257	0	65.6023	79.119	9.74485	2004.58	12.6709	7.39752	15.8387	0	0	64.0929	0	0
22202545	FG22202545	16160	Fladen Ground	UK	59.383	0.5	iOSL	48	0	0.0719369	0.0520115	4.57488	2.24288	4.71098	0	0	23.1126	0	0	0	0	0	0	0	0	34.6414	611.998	828.051	794.386	539.184	41.2732	524.305	563.244	435.405	75.9961	433.541	0	153.728	362.639	9.86822	5373.62	13.2064	6.47459	13.5993	0	0	66.7197	0	0
NIS22200033	Ic22200033	16161	Grimsey Island	Iceland	66.527	-18.2	iOSL	48	0.156494	0.107759	0.328081	16.7633	7.67895	32.3789	10.2692	0	47.2039	9.81786	12.4987	0	0	0	0	0	0	136.611	1297.07	940.595	571.77	498.355	39.2539	1062.18	425.212	770.603	157.094	392.468	0	221.377	236.211	11.3234	6623.51	12.2709	5.62104	23.7015	7.51714	0	34.5536	7.18673	9.14915
NIS22200037	Ic22200037	16162	Grimsey Island	Iceland	66.527	-18.2	iOSL	48	0.294936	0.178171	0.406401	95.0184	45.0729	112.843	46.7307	0	166.938	38.8921	72.4915	0	16.7311	0	15.659	13.2146	9.80141	633.393	1099.32	773.249	456.374	382.875	44.0264	966.399	334.668	537.638	96.258	314.283	84.5995	203.602	223.634	10.1016	5527.03	15.0015	7.1161	17.8157	7.37783	0	26.3562	6.14028	11.4449
NIS22200041	Ic22200041	16163	Grimsey Island	Iceland	66.527	-18.2	iOSL	48	0.27019	0.156103	0.364744	24.1977	13.2396	37.8406	15.3188	0	56.8632	11.5049	24.8891	0	0	0	0	0	0	183.854	548.18	431.257	261.44	201.18	0	515.408	175.904	365.67	19.5434	157.264	0	88.6749	108.953	11.8468	2885.32	13.1614	7.20113	20.5819	8.33208	0	30.9285	6.25761	13.5374
NIS22200046	Ic22200046	16164	Grimsey Island	Iceland	66.527	-18.2	iOSL	48	0.151539	0.107413	0.304133	23.9238	9.62584	36.123	10.2206	0	56.6959	16.3173	16.2542	0	0	0	0	0	0	169.161	637.41	459.258	280.361	226.891	28.5156	638.948	195.288	376.04	40.6412	160.062	0	101.429	119.759	9.90994	3274.51	14.1426	5.69035	21.3543	6.04197	0	33.516	9.64604	9.60875
NIS22200057	Ic22200057	16165	Grimsey Island	Iceland	66.527	-18.2	iOSL	48	0	0.0827809	0.243671	5.25558	2.99621	6.33269	0	0	24.4736	0	0	0	0	0	0	0	0	39.0581	498.607	367.145	226.704	193.089	26.7161	493.029	153.951	280.055	40.2565	150.152	4.86482	81.6643	91.9696	9.71966	2617.92	13.4558	7.67117	16.2135	0	0	62.6595	0	0
NIS22200066	Ic22200066	16166	Grimsey Island	Iceland	66.527	-18.2	iOSL	48	0	0.0807436	0.249871	6.66504	3.13769	10.5351	0	0	27.9967	0	0	0	0	0	0	0	0	48.3345	634.636	430.157	293.961	220.171	20.7942	585.144	170.844	346.115	7.53625	173.58	43.5432	103.317	125.059	10.1712	3165.03	13.7894	6.49161	21.7962	0	0	57.9228	0	0
NIS22200188	Ic22200188	16167	Grimsey Island	Iceland	66.527	-18.2	iOSL	48	0	0.0895132	0.262547	8.04419	4.24986	17.3402	0	0	32.0977	0	0	0	0	0	0	0	0	61.732	669.944	458.071	293.853	254.017	41.6302	573.014	205.235	356.229	32.4752	193.08	15.5442	116.94	134.272	9.42218	3353.73	13.0308	6.88438	28.0895	0	0	51.9953	0	0
NIS22200201	Ic22200201	16168	Grimsey Island	Iceland	66.527	-18.2	iOSL	48	0.275702	0.161722	0.386688	71.1206	34.9566	82.9135	36.5648	0	125.722	41.1496	61.3852	0	0	13.23	9.77167	8.91147	0	485.726	699.483	528.91	310.895	246.553	29.7586	702.658	218.883	410.623	0	171.044	0	129.727	141.514	10.0641	3600.11	14.6421	7.19679	17.07	7.52788	0	25.8834	8.47178	12.6378
NIS22200205	Ic22200205	16169	Grimsey Island	Iceland	66.527	-18.2	iOSL	48	0	0.103852	0.295618	7.57213	5.01351	19.5974	6.46364	0	32.4336	0	7.55475	0	0	0	0	0	0	78.6351	483.47	348.247	214.297	185.844	0	434.349	158.005	316.879	24.9355	151.852	29.9742	78.1969	97.9431	10.1383	2534.13	9.62946	6.37567	24.922	8.2198	0	41.2457	0	9.60735
NIS22200216	Ic22200216	16170	Grimsey Island	Iceland	66.527	-18.2	iOSL	48	0	0.0814535	0.253332	10.6497	3.45637	17.76	6.08326	0	32.8067	0	0	0	0	0	0	0	0	70.7561	726.64	524.811	345.871	271.442	47.5985	709.577	227.321	365.987	54.9906	189.737	0	125.554	150.45	9.50602	3749.49	15.0513	4.88492	25.1003	8.59751	0	46.366	0	0
NIS22200225	Ic22200225	16171	Grimsey Island	Iceland	66.527	-18.2	iOSL	48	0	0.0882934	0.266437	7.66514	3.27314	12.5303	0	0	30.8719	0	0	0	0	0	0	0	0	54.3405	1279.28	892.22	527.312	471.28	55.2629	1029.28	348.972	604.978	79.6342	370.928	7.814	207.219	229.717	10.9255	6114.83	14.1057	6.02338	23.0589	0	0	56.812	0	0
NIS22200272	Ic22200272	16172	Grimsey Island	Iceland	66.527	-18.2	iOSL	48	0	0.0693399	0.19733	5.03477	2.71808	7.28765	0	0	21.8179	0	0	0	0	0	0	0	0	36.8584	307.657	231.28	213.706	183.555	22.2143	282.163	145.304	236.802	35.4584	125.937	0	81.0588	110.72	9.94777	1985.8	13.6597	7.37437	19.772	0	0	59.1939	0	0
NIS22200284	Ic22200284	16173	Grimsey Island	Iceland	66.527	-18.2	iOSL	48	0	0.0821744	0.252241	5.40245	3.78051	7.30186	0	0	26.801	0	0	0	0	0	0	0	0	43.2858	802.52	563.354	343.26	312.085	54.5422	633.763	243.178	438.66	49.6425	223.944	0	131.315	150.745	10.9718	3957.98	12.4809	8.73384	16.8689	0	0	61.9163	0	0
NIS22200287	Ic22200287	16174	Grimsey Island	Iceland	66.527	-18.2	iOSL	48	0	0.107574	0.306919	11.3627	5.71222	28.8546	7.2845	0	43.983	0	11.6201	0	0	0	0	0	0	108.817	502.739	371.238	225.424	188.298	20.0107	488.327	158.581	321.948	41.5314	150.344	23.6146	79.502	89.9598	10.2903	2671.81	10.442	5.24937	26.5166	6.69426	0	40.4192	0	10.6786
NIS22200293	Ic22200293	16175	Grimsey Island	Iceland	66.527	-18.2	iOSL	48	0	0.0871302	0.276372	8.42407	3.60804	17.5262	4.93709	0	35.9787	0	0	0	0	0	0	0	0	70.4741	593.728	520.276	321.304	255.758	0	676.858	233.298	400.046	45.6517	184.044	46.4839	127.824	153.742	10.4094	3569.42	11.9534	5.11967	24.8691	7.00554	0	51.0523	0	0
NIS22200295	Ic22200295	16176	Grimsey Island	Iceland	66.527	-18.2	iOSL	48	0.269676	0.161873	0.383547	51.6753	26.2629	60.4214	28.6011	0	111.736	23.5343	48.8885	0	9.69771	0	7.89083	8.11069	0	376.818	611.116	428.666	237.22	215.869	0	451.98	186.453	315.014	0	160.764	0	96.2963	122.488	9.60216	2835.47	13.7136	6.96964	16.0346	7.59016	0	29.6524	6.24553	12.974
NIS22201162	Ic22201162	16177	Grimsey Island	Iceland	66.527	-18.2	iOSL	48	0	0.0934182	0.304501	11.1931	5.71539	25.2702	9.57355	0	55.89	0	0	0	0	0	0	0	0	107.642	703.457	502.281	328.868	265.076	0	556.296	224.638	394.688	0	169.349	0	109.342	145.853	9.97813	3409.83	10.3984	5.30962	23.4761	8.89386	0	51.922	0	0
NIS22201166	Ic22201166	16178	Grimsey Island	Iceland	66.527	-18.2	iOSL	48	0	0.079539	0.252299	6.90465	3.50595	12.7715	4.19607	0	27.8591	0	0	0	0	0	0	0	0	55.2373	429.043	304.465	214.145	171.642	0	264.694	147.872	232.057	0	114.459	0	80.2802	95.5769	10.5507	2064.78	12.5	6.34707	23.1211	7.59645	0	50.4354	0	0
NIS22201173	Ic22201173	16179	Grimsey Island	Iceland	66.527	-18.2	iOSL	48	0	0.0832001	0.260004	6.44491	3.04483	11.2853	0	0	29.3814	0	0	0	0	0	0	0	0	50.1565	555.491	388.772	242.412	208.71	0	399.082	162.295	290.985	29.661	149.466	0	89.9977	106.54	9.8462	2633.26	12.8496	6.07065	22.5003	0	0	58.5795	0	0
NIS22201210	Ic22201210	16180	Grimsey Island	Iceland	66.527	-18.2	iOSL	48	0.285281	0.162926	0.405412	56.0284	27.4855	72.1241	30.8816	0	104.488	34.4074	54.0988	0	9.32077	0	7.36286	6.64232	0	402.839	796.253	618.213	407.083	325.652	0	555.818	303.509	554.264	54.3881	271.431	0	144.518	177.869	11.289	4220.29	13.9084	6.82295	17.9039	7.66599	0	25.9378	8.54122	13.4294
NIS22201212	Ic22201212	16181	Grimsey Island	Iceland	66.527	-18.2	iOSL	48	0	0.0820525	0.250992	6.3065	3.59603	12.7321	0	0	28.6061	0	0	0	0	0	0	0	0	51.2407	524.828	369.612	238.847	195.286	0	443.939	165.288	301.536	28.5442	135.278	0	85.8248	106.054	9.94403	2604.98	12.3076	7.0179	24.8476	0	0	55.827	0	0
NIS22201259	Ic22201259	16182	Grimsey Island	Iceland	66.527	-18.2	iOSL	48	0.293986	0.170314	0.408695	52.726	27.5122	60.5146	27.1387	0	94.4508	23.3783	51.9453	0	9.92753	0	6.34602	6.47181	9.62998	370.041	562.801	391.411	226.785	190.258	0	403.003	172.718	347.092	40.0578	162.669	26.3643	92.6349	103.373	8.84963	2728.02	14.2487	7.43489	16.3535	7.33397	0	25.5244	6.31774	14.0377
NIS22201260	Ic22201260	16183	Grimsey Island	Iceland	66.527	-18.2	iOSL	48	0.282675	0.164707	0.388021	60.9529	30.5245	73.7894	33.3876	0	118.488	27.7113	60.8784	0	10.8022	0	9.28822	9.28929	9.68256	444.794	701.688	505.949	289.295	248.938	0	530.039	229.007	382.392	27.8819	203.912	0	123.764	135.591	9.56437	3388.02	13.7036	6.86262	16.5896	7.5063	0	26.6388	6.23014	13.6869
NIS22201277	Ic22201277	16184	Grimsey Island	Iceland	66.527	-18.2	iOSL	48	0.309465	0.184578	0.406579	59.2639	76.0818	65.2668	37.4456	0	117.208	41.1728	68.7972	0	13.4613	0	7.65912	9.13968	9.57245	505.069	570.381	432.864	255.446	216.166	0	469.36	181.648	327.002	54.1682	175.847	60.867	102.47	112.791	9.12754	2968.14	11.7338	15.0636	12.9223	7.41396	0	23.2064	8.15192	13.6213
NIS22202034	Ic22202034	16185	Grimsey Island	Iceland	66.527	-18.2	iOSL	48	0.342943	0.194512	0.416482	103.931	53.3001	118.773	55.6278	0	201.125	42.4675	98.413	0	20.8021	0	15.9071	15.1297	10.0925	735.569	858.124	655.733	362.478	308.936	0	736.686	280.044	462.889	98.6234	240.988	60.5036	153.716	158.508	9.45145	4386.68	14.1293	7.2461	16.1471	7.56255	0	27.3428	5.77342	13.3792
NIS22202043	Ic22202043	16186	Grimsey Island	Iceland	66.527	-18.2	iOSL	48	0.178248	0.100466	0.304081	17.1432	8.2559	29.4783	9.93185	0	43.9485	7.9935	15.3069	0	0	0	0	0	0	132.058	484.372	325.576	198.904	171.04	0	328.414	148.572	310.834	5.16235	122.024	0	72.7968	96.27	9.96438	2273.93	12.9815	6.25172	22.3222	7.52081	0	33.2797	6.05301	11.5911
NIS22202050	Ic22202050	16187	Grimsey Island	Iceland	66.527	-18.2	iOSL	48	0.346067	0.184427	0.43072	76.3839	77.8977	45.7914	37.1978	0	142.042	49.2974	78.3337	0	16.7908	0	11.132	11.0597	9.55306	555.48	673.327	467.194	261.796	214.722	0	501.407	199.436	443.434	39.1956	196.268	47.8425	100.205	124.167	10.3112	3279.3	13.751	14.0235	8.24357	6.69651	0	25.5711	8.87475	14.102
NIS22202057	Ic22202057	16188	Grimsey Island	Iceland	66.527	-18.2	iOSL	48	0	0.0893257	0.273594	7.96629	3.64264	17.0528	5.51968	0	32.5976	0	0	0	0	0	0	0	0	66.779	746.685	573.765	362.622	299.505	0	562.853	262.013	429.918	52.1619	210.986	8.02658	122.547	148.021	11.2254	3790.33	11.9293	5.45477	25.5361	8.26559	0	48.8142	0	0
NIS22203436	Ic22203436	16189	Grimsey Island	Iceland	66.527	-18.2	iOSL	48	0	0.0893916	0.290824	6.57146	2.80026	14.7355	5.43083	0	26.001	0	0	0	0	0	0	0	0	55.539	746.905	498.057	293.695	264.056	0	470.713	209.556	382.31	65.1079	221.977	15.5596	102.299	115.942	9.73929	3395.92	11.8322	5.04197	26.5317	9.77842	0	46.8157	0	0
NIS22201271	Ic22201271	16190	Grimsey Island	Iceland	66.527	-18.2	iOSL	48	0	0.0955646	0.303896	14.3389	7.34162	31.3829	8.31033	0	62.1776	9.02964	14.7804	0	0	0	0	0	0	147.361	812.793	564.319	346.48	293.524	0	555.231	243.854	384.042	47.6705	237.864	83.069	146.905	158.554	9.76983	3884.08	9.73046	4.98205	21.2965	5.63942	0	42.194	6.12754	10.03
22201300	Ic22201300	16481	Grimsey Island	Iceland	66.5317	-18.2135	iOSL	48	0.323535	0.266644	0.409756	63.0024	29.1084	65.8818	27.9362	0	88.6186	40.2728	33.1763	0	11.2939	0	9.03968	10.4849	9.85517	388.67	547.216	338.772	172.771	170.252	0	322.115	191.758	252.073	43.2519	215.902	117.898	101.728	110.05	10.0465	2593.83	16.2097	7.48922	16.9506	7.18764	0	22.8005	10.3617	8.53585
22201200	Ic22201200	16482	Grimsey Island	Iceland	66.5317	-18.2135	iOSL	48	0.192956	0.21063	0.312834	35.7617	16.3937	49.2729	16.0249	0	64.8555	24.4075	23.8042	0	4.07341	0	5.94124	4.83273	10.0677	255.435	586.361	395.514	217.406	207.369	0	391.794	227.409	259.764	28.3182	250.641	121.302	113.706	116.934	10.1607	2926.68	14.0003	6.41792	19.2898	6.27358	0	25.3902	9.55524	9.31907
22201201	Ic22201201	16483	Grimsey Island	Iceland	66.5317	-18.2135	iOSL	48	0	0.171059	0.24773	6.09085	2.38455	10.6119	0	0	22.1496	0	0	0	0	0	0	0	0	41.2369	380.232	243.395	127.103	139.688	0	153.032	194.031	181.063	7.14881	178.668	23.4477	70.967	67.3351	11.9004	1778.01	14.7704	5.78256	25.7341	0	0	53.713	0	0
22201202	Ic22201202	16484	Grimsey Island	Iceland	66.5317	-18.2135	iOSL	48	0	0.164695	0.245162	6.67836	2.8723	11.7386	2.45618	0	25.2551	0	0	0	0	0	0	0	0	49.0006	425.2	282.576	161.214	176.358	0	216.052	199.719	220.607	2.71092	202.615	16.057	87.3647	88.558	10.6809	2089.71	13.6291	5.86177	23.956	5.01256	0	51.5405	0	0
22201213	Ic22201213	16485	Grimsey Island	Iceland	66.5317	-18.2135	iOSL	48	0.163329	0.204061	0.319729	16.0146	6.56503	28.6797	7.23001	0	38.6097	7.34271	7.06197	0	0	0	0	0	0	111.504	452.151	219.73	171.247	157.529	0	241.752	174.175	212.987	3.68436	128.74	27.2686	67.7262	73.1663	10.1521	1940.31	14.3624	5.88772	25.7209	6.4841	0	34.6264	6.58518	6.3334
22201227	Ic22201227	16486	Grimsey Island	Iceland	66.5317	-18.2135	iOSL	48	0	0.150869	0.273999	5.4961	3.48418	11.0376	3.84447	0	23.9971	0	0	0	0	0	0	0	0	47.8595	214.638	121.739	85.8307	69.9891	0	140.081	72.3781	107.671	2.69548	63.2581	0	44.8514	33.1878	10.4252	966.745	11.4838	7.28002	23.0625	8.03283	0	50.1408	0	0
22201229	Ic22201229	16487	Grimsey Island	Iceland	66.5317	-18.2135	iOSL	48	0.111763	0.18452	0.311598	15.0615	6.37382	23.0805	6.80346	0	36.3463	10.7909	7.83983	0	0	0	0	0	0	106.296	595.165	366.671	201.336	206.59	35.0005	318.017	204.248	274.021	54.8176	252.78	22.7439	107.946	110.433	9.91579	2759.69	14.1693	5.99629	21.7134	6.40047	0	34.1934	10.1517	7.37546
22201231	Ic22201231	16488	Grimsey Island	Iceland	66.5317	-18.2135	iOSL	48	0	0.166501	0.260709	7.42764	3.65724	13.6749	4.03292	0	27.3974	0	0	0	0	0	0	0	0	56.1902	671.6	443.941	229.366	248.279	0	369.803	280.154	274.096	11.2554	297.274	28.8116	132.63	128.218	10.9352	3126.36	13.2188	6.50869	24.3369	7.17728	0	48.7584	0	0
22201237	Ic22201237	16489	Grimsey Island	Iceland	66.5317	-18.2135	iOSL	48	0	0.173764	0.262416	7.26889	3.70103	16.0281	3.6444	0	27.7656	0	0	0	0	0	0	0	0	58.408	439.788	307.887	167.547	171.67	0	285.727	180.828	201.677	11.5659	212.768	18.2846	94.4592	93.3038	10.435	2195.94	12.445	6.33651	27.4416	6.23956	0	47.5373	0	0
22201243	Ic22201243	16490	Grimsey Island	Iceland	66.5317	-18.2135	iOSL	48	0	0.171896	0.274914	9.59924	3.88105	19.4708	6.13792	0	30.2116	0	3.97082	0	0	0	0	0	0	73.2714	576.5	372.492	202.081	208.606	33.8458	303.165	205.12	278.616	0	248.102	0	105.462	104.428	9.87058	2648.29	13.1009	5.29681	26.5735	8.37696	0	41.2325	0	5.41933
22201251	Ic22201251	16491	Grimsey Island	Iceland	66.5317	-18.2135	iOSL	48	0	0.171128	0.252408	4.43344	1.40592	6.11509	2.34473	0	20.5262	0	0	0	0	0	0	0	0	34.8254	350.125	221.6	121.487	124.355	0	209.436	122.668	186.289	5.17019	153.07	9.29431	63.9016	64.0146	10.3104	1641.72	12.7305	4.03705	17.5593	6.73283	0	58.9403	0	0
22201263	Ic22201263	16492	Grimsey Island	Iceland	66.5317	-18.2135	iOSL	48	0	0.171044	0.254502	10.8059	4.67389	13.801	4.8277	0	26.9958	0	4.32202	0	0	0	0	0	0	65.4262	501.772	319.092	174.695	178.634	0	263.726	169.146	212.077	5.15727	208.038	18.1419	99.2976	95.7475	10.2267	2255.75	16.5161	7.14376	21.0939	7.37885	0	41.2614	0	6.60594
22201281	Ic22201281	16493	Grimsey Island	Iceland	66.5317	-18.2135	iOSL	48	0	0.168826	0.260684	7.40111	3.09579	11.386	4.45223	0	24.4692	0	0	0	0	0	0	0	0	50.8044	642.744	405.865	217.733	232.915	39.2272	346.929	253.222	287.599	57.0514	287.608	45.7878	121.217	117.243	10.5859	3065.73	14.5679	6.09354	22.4115	8.76346	0	48.1636	0	0
22201272	Ic22201272	16494	Grimsey Island	Iceland	66.5317	-18.2135	iOSL	48	0	0.172647	0.252544	4.62845	3.48899	8.59887	2.82118	0	20.8871	0	0	0	0	0	0	0	0	40.4246	467.618	305.594	162.999	170.973	0	223.486	176.188	216.74	36.1685	221.819	10.0747	91.7855	83.0052	10.4083	2176.86	11.4496	8.63087	21.2714	6.97886	0	51.6693	0	0
22201276	Ic22201276	16495	Grimsey Island	Iceland	66.5317	-18.2135	iOSL	48	0	0.166008	0.253603	3.67437	0	9.31581	0	0	23.0522	0	0	0	0	0	0	0	0	36.0424	684.852	466.03	238.773	269.258	0	298.845	323.83	283.206	56.7772	309.872	0	140.407	146.578	11.4266	3229.85	10.1946	0	25.8468	0	0	63.9586	0	0
22200035	Ic22200035	16496	Grimsey Island	Iceland	66.5298	-18.2071	iOSL	48	0.354403	0.263645	0.418332	72.2199	33.3024	76.7855	34.7055	0	91.2186	40.539	55.2906	0	12.6156	0	9.63899	7.93209	10.015	444.263	652.952	425.241	212.305	220.57	0	313.571	249.96	298.794	30.6195	287.521	31.302	125.272	109.364	10.8281	2968.3	16.2561	7.4961	17.2838	7.81193	0	20.5326	9.12499	12.4455
22200194	Ic22200194	16497	Grimsey Island	Iceland	66.5258	-18.2002	iOSL	48	0.295073	0.232459	0.382428	29.7346	13.3111	42.5562	18.3423	0	48.2878	26.2282	27.9305	0	6.26313	0	4.51865	4.41374	9.96453	231.551	449.803	273.773	140.753	142.762	0	225.201	165.317	242.316	27.9773	195.423	0	82.8402	71.941	10.6256	2028.73	12.8415	5.74867	18.3788	7.92152	0	20.8541	11.3272	12.0624
22202048	Ic22202048	16498	Grimsey Island	Iceland	66.5068	-18.1949	iOSL	48	0.269297	0.241482	0.394121	39.8011	18.6198	44.4384	17.7231	0	55.8474	29.6919	23.902	0	5.91901	0	5.34829	4.40849	9.97725	255.677	471.926	283.951	146.005	151.233	0	249.75	172.866	219.406	0	182.495	0	80.1277	82.616	10.781	2051.16	15.567	7.28255	17.3807	6.93183	0	21.843	11.6131	9.34853
22200204	Ic22200204	16499	Grimsey Island	Iceland	66.5258	-18.2002	iOSL	48	0	0.118099	0.257108	10.0095	4.06018	10.4883	3.47451	0	31.1041	0	0	0	0	0	0	0	0	59.1366	678.018	392.432	251.394	236.695	36.486	425.17	238.096	266.406	7.25096	192.195	0	110.904	27.6922	10.3119	2873.05	16.9261	6.86577	17.7357	5.8754	0	52.597	0	0
22202041	Ic22202041	16500	Grimsey Island	Iceland	66.5068	-18.1949	iOSL	48	0	0.151013	0.242985	6.12519	2.28434	13.1686	3.46233	0	23.0326	0	0	0	0	0	0	0	0	48.073	567.722	370.629	212.935	210.47	35.5187	347.382	221.979	257.527	24.2289	264.374	19.9217	122.956	133.999	10.1013	2799.74	12.7414	4.75182	27.3929	7.20223	0	47.9116	0	0
22200232	Ic22200232	16501	Grimsey Island	Iceland	66.5258	-18.2002	iOSL	48	0	0.141108	0.265739	11.8814	4.84508	8.24253	5.77964	0	41.1339	0	5.16184	0	0	0	0	0	0	77.0443	335.722	218.568	228.815	252.724	33.5345	327.517	276.678	278.578	66.7621	335.247	0	143.364	134.63	10.8441	2642.98	15.4215	6.2887	10.6984	7.50171	0	53.3899	0	6.69983
22202030	Ic22202030	16502	Grimsey Island	Iceland	66.5068	-18.1949	iOSL	48	0	0.133865	0.244319	4.52625	2.34952	8.93758	2.76726	0	19.1316	0	0	0	0	0	0	0	0	37.7122	286.001	152.824	102.786	99.1451	0	143.628	105.851	126.19	2.32963	106.094	5.476	45.1565	44.2435	10.6038	1230.33	12.0021	6.23013	23.6994	7.33784	0	50.7305	0	0
22200213	Ic22200213	16503	Grimsey Island	Iceland	66.5258	-18.2002	iOSL	48	0	0.100172	0.226378	4.43213	2.19815	15.4292	3.57978	0	18.3312	0	0	0	0	0	0	0	0	43.9705	136.279	111.115	166.33	151.991	18.1755	204.83	137.386	218.278	10.2866	182.728	18.7685	66.8884	89.4547	10.3164	1522.83	10.0798	4.99914	35.09	8.14132	0	41.6897	0	0
22200294	Ic22200294	16504	Grimsey Island	Iceland	66.5128	-18.198	iOSL	48	0	0.112359	0.301165	7.36054	4.15121	17.2106	4.2406	0	32.8074	0	5.21502	0	0	0	0	0	0	70.9854	277.745	187.744	110.957	109.438	13.9264	184.559	115.989	131.637	2.37712	127.749	19.8902	53.3668	59.3543	9.61078	1404.34	10.3691	5.84798	24.2452	5.97391	0	46.2172	0	7.34661
22201493	Ic22201493	16505	Grimsey Island	Iceland	66.4613	-18.2246	iOSL	48	0	0.151361	0.257602	5.78812	3.16207	11.971	3.5708	0	21.7755	0	0	0	0	0	0	0	0	46.2675	357.837	252.608	138.093	152.9	20.7008	183.677	166.592	155.393	3.23835	181.241	0	78.0598	83.9643	10.9092	1785.21	12.5101	6.83434	25.8735	7.71773	0	47.0643	0	0
22201494	Ic22201494	16506	Grimsey Island	Iceland	66.4613	-18.2246	iOSL	48	0	0.121644	0.253286	3.42035	1.67917	12.5998	4.22335	0	24.7174	0	0	0	0	0	0	0	0	46.6401	371.546	232.973	182.532	191.361	25.3225	193.255	182.632	237.645	9.53942	228.641	19.2379	82.1773	88.1814	10.1947	2055.24	7.3335	3.60028	27.015	9.05519	0	52.996	0	0
22201526	Ic22201526	16507	Grimsey Island	Iceland	66.4625	-18.2154	iOSL	48	0	0.192735	0.303356	7.13672	3.86595	19.8959	7.60184	0	26.8103	11.5008	11.7367	0	0	0	0	0	0	88.5483	323.781	212.944	114.481	116.026	0	185.541	141.071	166.444	0	135.599	0	61.134	66.4863	10.6311	1534.14	8.05969	4.36592	22.469	8.58497	0	30.2776	12.9882	13.2546
22201540	Ic22201540	16508	Grimsey Island	Iceland	66.4625	-18.2154	iOSL	48	0	0.139518	0.284475	9.15624	4.49416	14.8444	4.47676	0	28.3092	0	6.84688	0	0	0	0	0	0	68.1276	745.19	432.264	292.022	329.752	39.739	358.584	341.795	382.16	55.9723	392.629	82.7039	151.451	143.741	10.1577	3758.16	13.4398	6.59668	21.7891	6.57114	0	41.5532	0	10.0501
22201542	Ic22201542	16509	Grimsey Island	Iceland	66.4625	-18.2154	iOSL	48	0.271359	0.173757	0.350898	19.578	8.19689	28.1759	9.93437	0	38.3354	9.07329	16.4741	0	2.70494	0	0	0	0	132.473	445.389	276.61	151.414	153.572	0	237.95	177.733	267.518	14.3382	206.69	0	74.9428	75.3359	10.3488	2091.84	14.7788	6.1876	21.2692	7.49918	0	28.9383	6.84917	12.4358
22101576	Ic22101576	16510	Grimsey Island	Iceland	66.4625	-18.2154	iOSL	48	0.199544	0.184267	0.364212	32.9957	15.2886	45.9752	16.9394	0	40.0018	42.1782	25.9628	0	4.07005	0	0	0	0	223.412	577.817	318.88	223.774	224.972	0	267.392	235.383	247.25	0	213.844	0	100.042	107.459	10.1647	2526.98	14.769	6.84323	20.5787	7.58214	0	17.905	18.8792	11.6211
22200393	Ic22200393	16716	Grimsey Island	Iceland	66.5258	-18.2002	iOSL	48	0.160079	0.197295	0.316721	27.0326	10.7172	36.4341	13.8736	0	58.7407	10.9498	15.7611	0	0	0	0	0	0	173.509	2688.23	1817.49	965.437	925.932	119.849	1208.23	894.854	1251.21	270.054	1194.19	25.4294	493.57	614.05	56.2342	12524.8	15.5799	6.17675	20.9984	7.99591	0	33.8545	6.31081	9.08371
22200379	Ic22200379	16717	Grimsey Island	Iceland	66.5258	-18.2002	iOSL	48	0.355206	0.2725	0.439983	67.7494	29.8416	68.6603	30.0431	0	105.938	37.9963	42.5429	0	13.8412	0	11.0288	9.69649	0	417.337	1295.58	943.526	449.649	447.486	45.8319	792.114	484.671	658.357	116.438	570.883	0	254.647	277.764	46.0502	6383	16.2337	7.15046	16.452	7.19874	0	25.3841	9.10444	10.1939
22200628	Ic22200628	16718	Grimsey Island	Iceland	66.5289	-18.2119	iOSL	48	0.141075	0.176085	0.312137	16.3149	7.29315	28.6355	8.14006	0	53.7729	13.5018	13.69	0	0	0	0	0	0	141.348	722.18	460.321	241.586	254.015	36.4389	468.294	264.475	294.115	39.9266	299.568	0	133.272	165.138	9.22365	3388.55	11.5423	5.1597	20.2588	5.75887	0	38.0428	9.55215	9.68532
22200647	Ic22200647	16719	Grimsey Island	Iceland	66.5289	-18.2119	iOSL	48	0.31781	0.254244	0.387706	94.8911	37.2728	91.6214	39.0803	0	130.653	39.7005	63.7474	0	14.6124	0	12.9226	12.5313	8.72175	545.755	1009.77	642.247	316.455	326.955	41.0497	503.911	410.886	408.485	92.5122	409.427	0	180.021	209.604	42.5654	4593.89	17.3871	6.82958	16.788	7.16079	0	23.9399	7.27442	11.6806
22200832	Ic22200832	16720	Grimsey Island	Iceland	66.5128	-18.198	iOSL	48	0.29916	0.247099	0.394872	55.9525	26.8647	62.3589	22.7679	0	92.6804	26.5922	41.1814	0	9.12639	0	8.08186	6.41744	9.00344	361.027	642.12	420.926	208.95	203.49	26.1151	401.244	201.549	296.638	74.0561	261.117	4.73893	113.283	123.023	15.1821	2992.43	15.4982	7.44119	17.2726	6.30641	0	25.6713	7.3657	11.4067
22200888	Ic22200888	16721	Grimsey Island	Iceland	66.5128	-18.198	iOSL	48	0.275685	0.220657	0.384028	73.263	33.3731	82.915	35.6	0	105.725	35.2573	53.8719	0	10.2662	0	9.34298	8.92458	9.16962	457.709	1092.47	700.751	327.395	370.155	48.0429	570.816	367.63	435.221	3.42802	418.038	21.1477	180.488	199.02	20.8832	4755.49	16.0064	7.29134	18.1152	7.77787	0	23.0988	7.703	11.7699
22200957	Ic22200957	16722	Grimsey Island	Iceland	66.5141	-18.1908	iOSL	48	0	0.172063	0.298254	8.3587	4.03307	16.6832	4.9283	0	26.1592	0	7.0848	0	0	0	0	0	0	67.2473	775.457	565.034	314.25	284.079	32.6819	503.255	401.867	446.915	38.9855	345.437	0	167.716	190.063	37.2732	4103.01	12.4298	5.99737	24.8088	7.32862	0	38.9	0	10.5354
22200997	Ic22200997	16723	Grimsey Island	Iceland	66.5141	-18.1908	iOSL	48	0.157306	0.171392	0.316994	16.2926	7.32548	28.4516	7.30142	0	53.2896	13.2023	9.56807	0	0	0	0	0	0	135.431	595.091	379.972	216.249	204.171	31.3503	418.296	228.238	268.154	23.7289	236.613	0	108.065	123.557	8.01687	2841.5	12.0302	5.40901	21.0082	5.39125	0	39.3482	9.74833	7.0649
22201090	Ic22201090	16724	Grimsey Island	Iceland	66.5284	-18.202	iOSL	48	0	0.15786	0.241656	5.57597	2.34663	9.29898	3.31462	0	25.3293	0	4.34631	0	0	0	0	0	0	50.2118	391.634	256.758	141.877	144.371	19.4754	233.537	151.109	184.279	21.8975	173.178	9.86423	63.0879	71.2153	8.96386	1871.25	11.1049	4.67347	18.5195	6.60127	0	50.4449	0	8.65595
22201964	Ic22201964	16725	Grimsey Island	Iceland	66.5087	-18.1872	iOSL	48	0.172332	0.166811	0.29216	13.2953	5.5962	23.9873	7.16583	0	42.9298	5.48688	10.2921	0	0	0	0	0	0	108.753	524.532	327.609	180.947	187.464	25.9909	293.275	172.069	237.102	42.3191	210.029	60.0831	84.3222	95.1297	14.2391	2455.11	12.2252	5.14577	22.0566	6.58907	0	39.4745	5.04525	9.46367
22202140	Ic22202140	16726	Grimsey Island	Iceland	66.5101	-18.1976	iOSL	48	0.12944	0.181014	0.310292	14.7012	6.48885	24.047	7.83092	0	41.7911	6.20668	10.3421	0	0	0	0	0	0	111.408	728.029	462.817	238.615	249.669	33.5231	446.084	241.921	299.969	54.543	299.63	0	115.081	139.257	12.2595	3321.4	13.1958	5.82441	21.5847	7.02906	0	37.5118	5.57113	9.28308
22202200	Ic22202200	16727	Grimsey Island	Iceland	66.5101	-18.1976	iOSL	48	0	0.172326	0.296042	8.16182	3.6489	15.3462	4.44842	0	26.7986	4.30633	7.52829	0	0	0	0	0	0	70.2385	593.726	388.712	200.979	213.687	27.216	375.4	209.179	281.547	68.2224	244.299	31.5996	100.333	107.337	9.49916	2851.74	11.6201	5.19501	21.8486	6.3333	0	38.1537	6.131	10.7182
22202717	FG22202717	16728	Fladen Ground	UK	59.1259	0.170111	iOSL	48	0	0.168469	0.299074	6.08204	2.26399	11.3938	3.24342	0	23.7835	0	4.46911	0	0	0	0	0	0	51.2359	1172.48	861.768	488.434	427.926	52.7481	902.718	547.336	801.951	45.4356	501.177	27.0918	210.638	270.731	16.3606	6326.79	11.8707	4.41876	22.238	6.33036	0	46.4197	0	8.72262
22202743	FG22202743	16729	Fladen Ground	UK	59.127	0.160201	iOSL	48	0	0.160482	0.266887	4.15909	1.66048	7.83183	0	0	19.5813	0	0	0	0	0	0	0	0	33.2327	270.062	181.105	105.402	99.4465	7.24179	185.265	125.357	189.022	7.43325	121.066	7.51011	45.7284	56.1764	9.8768	1410.69	12.5151	4.99654	23.5667	0	0	58.9217	0	0
22202755	FG22202755	16730	Fladen Ground	UK	59.127	0.160201	iOSL	48	0	0.155478	0.306366	7.0627	2.51417	10.9227	3.1395	0	27.5888	0	3.21183	0	0	0	0	0	0	54.4397	466.506	218.271	157.765	150.81	20.6154	247.982	145.165	253.107	1.9009	149.788	12.8325	62.8845	82.6551	9.32862	1979.61	12.9734	4.61828	20.0638	5.76694	0	50.6777	0	5.89979
22202841	FG22202841	16731	Fladen Ground	UK	59.121	0.161821	iOSL	48	0	0.17606	0.280152	7.04564	3.8799	13.0831	5.28322	0	25.1974	3.32656	7.18637	0	0	0	0	0	0	65.0022	407.846	240.721	126.352	128.707	19.4761	226.845	133.069	239.646	22.7863	166.319	7.75488	52.5563	69.1809	9.43932	1850.7	10.8391	5.96888	20.1272	8.12776	0	38.7639	5.11761	11.0556
22202987	FG22202987	16732	Fladen Ground	UK	59.1163	0.16365	iOSL	48	0	0.171056	0.263138	6.053	3.03828	14.613	3.96155	0	25.3166	0	6.5808	0	0	0	0	0	0	59.5632	288.554	187.138	101.244	102.868	10.943	182.236	115.418	179.988	6.07875	117.474	7.89268	45.4503	61.9234	9.3403	1416.55	10.1623	5.10093	24.5336	6.651	0	42.5037	0	11.0484
22203074	FG22203074	16733	Fladen Ground	UK	59.1248	0.161933	iOSL	48	0	0.158761	0.296847	6.05962	3.35899	10.8839	4.06683	0	33.842	0	6.22556	0	0	0	0	0	0	64.4369	248.467	141.742	84.687	80.7567	9.62491	147.982	93.2249	151.611	2.74223	92.0483	13.592	31.7005	36.6861	9.32374	1144.19	9.40396	5.21283	16.8908	6.31133	0	52.5196	0	9.66148
22202633	FG22202633	16734	Fladen Ground	UK	59.719	-0.33371	iOSL	48	0	0.178194	0.327774	10.2845	4.29929	18.0687	4.51915	0	29.1508	0	7.02248	0	0	0	0	0	0	73.3449	497.474	299.588	162.067	165.675	30.7459	277.885	154.617	252.004	37.89	202.835	6.84964	72.6231	86.0776	9.02386	2255.36	14.0221	5.86175	24.6353	6.16151	0	39.7448	0	9.57461
22202637	FG22202637	16735	Fladen Ground	UK	59.7192	-0.32756	iOSL	48	0	0.171439	0.260114	4.04359	1.97488	8.61457	0	0	17.0099	0	0	0	0	0	0	0	0	31.6429	330.706	227.795	115.142	124.093	19.0116	205.939	126.388	176.509	10.1761	140.613	15.2551	50.3546	61.7068	9.4887	1613.18	12.7788	6.24112	27.2243	0	0	53.7558	0	0
22202638	FG22202638	16736	Fladen Ground	UK	59.719	-0.32756	iOSL	48	0	0.158015	0.277036	7.67756	3.29652	12.7026	0	0	26.1446	0	0	0	0	0	0	0	0	49.8212	559.801	344.645	179.802	199.679	32.8304	314.896	186.477	246.185	0	222.801	0	54.0967	107.087	9.52886	2457.83	15.4102	6.6167	25.4963	0	0	52.4768	0	0
22202640	FG22202640	16737	Fladen Ground	UK	59.719	-0.32756	iOSL	48	0.231907	0.164771	0.197918	12.7924	3.84311	17.2195	4.52844	0	25.8238	7.1935	6.9481	0	0	0	0	0	0	78.3488	365.531	275.58	194.038	142.533	26.1095	390.954	221.849	321.973	20.612	150.12	38.0822	72.8885	116.017	11.2583	2347.55	16.3274	4.90513	21.978	5.77985	0	32.9601	9.18138	8.86817
22203281	FG22203281	16738	Fladen Ground	UK	59.719	-0.32756	iOSL	48	0	0.168095	0.296627	7.19963	2.8834	12.0042	0	0	30.3153	0	0	0	0	0	0	0	0	52.4025	490.658	289.823	146.872	153.18	26.9767	277.517	157.763	285.954	26.773	201.076	14.5825	65.1607	84.1825	9.12262	2229.64	13.7391	5.50241	22.9077	0	0	57.8508	0	0
22202652	FG22202652	16739	Fladen Ground	UK	57.9296	1.62739	iOSL	48	0.510958	0.37533	0.263138	189.697	60.5105	109.843	57.9078	0	164.238	82.3508	141.843	0	56.5635	0	27.3442	25.7786	9.95641	926.032	2608.73	1766.46	683.639	678.202	90.6227	1253.48	778.281	1239.4	221.535	1020.24	30.061	431.091	493.278	12.0652	11307.1	20.4849	6.53438	11.8616	6.25332	0	17.7357	8.89286	15.3173
22202653	FG22202653	16740	Fladen Ground	UK	57.9296	1.62739	iOSL	48	0.536651	0.405843	0.296847	240.163	74.6139	144.436	70.5977	0	230.849	80.3063	168.532	0	67.5015	0	34.5899	34.4147	11.3688	1157.37	1282.73	822.346	322.22	340.808	39.7388	693.456	356.218	621.358	308.945	509.636	0	204.348	241.296	9.19354	5752.29	20.7507	6.44683	12.4797	6.09982	0	19.9459	6.93867	14.5616
22202654	FG22202654	16741	Fladen Ground	UK	57.9296	1.62739	iOSL	48	0.526324	0.387043	0.327774	275.546	88.4537	148.487	69.4023	0	284.266	99.7289	177.143	0	82.0657	0	48.8473	50.9341	9.10766	1333.98	647.622	378.625	177.414	172.007	22.5439	396.869	198.97	297.541	75.1126	230.978	46.1751	105.744	145.558	9.01493	2904.17	20.6559	6.63081	11.1311	5.20264	0	21.3096	7.47604	13.2792
22202655	FG22202655	16742	Fladen Ground	UK	57.9296	1.62739	iOSL	48	0.516766	0.358526	0.260114	166.469	56.4644	105.666	55.8922	0	167.11	59.9516	132.067	0	47.9803	0	24.2644	23.8348	9.22769	848.927	923.175	594.349	238.588	264.018	22.6785	477.222	271.545	434.743	138.859	382.706	0	140.638	164.62	9.53643	4062.68	19.6093	6.65127	12.447	6.58387	0	19.6849	7.06204	15.5569
22202656	FG22202656	16743	Fladen Ground	UK	57.9296	1.62739	iOSL	48	0.517264	0.405121	0.277036	317.54	97.5469	175.246	84.2355	0	281.291	102.855	216.868	9.636	83.0822	0	46.5949	43.2406	9.57567	1467.71	1454.16	924.787	358.895	385.772	50.3532	793.225	387.805	604.097	342.461	571.976	0	233.561	273.114	9.54661	6389.75	21.635	6.64619	11.9401	5.73924	0	19.1653	7.00783	14.7759
22202659	FG22202659	16744	Fladen Ground	UK	57.9282	1.61111	iOSL	48	0.511073	0.384534	0.197918	242.071	78.2007	142.81	75.2599	0	220.784	150.334	160.32	5.50328	71.5448	0	43.954	45.5268	9.47336	1245.78	1021.36	675.493	285.648	294.471	47.5419	600.584	301.658	424.098	95.3177	419.016	0	190.57	249.74	10.0119	4615.51	19.4313	6.27724	11.4635	6.04118	0	17.7225	12.0675	12.8691
22202660	FG22202660	16745	Fladen Ground	UK	57.9282	1.61111	iOSL	48	0.52238	0.375596	0.296627	190.047	60.1001	103.175	54.8907	0	176.468	77.3727	125.05	0	49.6714	0	25.7778	26.3984	9.42843	898.379	864.369	540.057	209.045	230.975	39.5329	461.75	218.838	391.364	89.7967	344.682	0	128.989	158.599	9.11239	3687.11	21.1545	6.68983	11.4846	6.10997	0	19.6429	8.61248	13.9195
22202661	FG22202661	16746	Fladen Ground	UK	57.9282	1.61111	iOSL	48	0.495842	0.35888	0.518806	179.939	63.3398	118.584	62.5481	0	159.656	127.188	134.776	0	54.7184	0	31.9419	30.8251	9.5201	973.037	937.758	629.472	260.243	281.622	37.9497	456.169	378.989	432.625	171.1	405.306	26.987	167.682	202.975	45.8168	4434.69	18.4925	6.50949	12.187	6.42813	0	16.408	13.0713	13.8511
22202662	FG22202662	16747	Fladen Ground	UK	57.9282	1.61111	iOSL	48	0.504336	0.361905	0.487889	190.725	69.7527	119.793	63.1156	0	157.927	136.63	141.89	0	58.609	0	35.1986	33.7362	9.73258	1017.11	858.456	599.604	247.757	258.854	35.1695	429.526	411.613	384.427	66.1686	369.551	0	166.807	205.43	60.6032	4093.97	18.7517	6.85792	11.7778	6.20538	0	15.527	13.4332	13.9503
22202663	FG22202663	16748	Fladen Ground	UK	57.9282	1.61111	iOSL	48	0.520946	0.395194	0.530287	221.883	74.8551	139.6	69.0045	0	223.867	86.6696	168.457	0	66.2013	0	38.9867	33.4423	9.06263	1132.03	1042.65	701.117	280.678	296.043	35.9411	609.525	313.984	458.565	137.152	434.263	0	181.473	212.93	40.6157	4744.94	19.6005	6.61247	12.3319	6.09564	0	19.7758	7.65612	14.8809
												FAA															THAA															FAA
											Average	[Asx]	[Glx]	[Ser]	[Thr]	[His]	[Gly]	[Arg]	[Ala]	[Tyr]	[Val]	[Met]	[Phe]	[Leu]	[Ile]	Average	[Asx]	[Glx]	[Ser]	[Thr]	[His]	[Gly]	[Arg]	[Ala]	[Tyr]	[Val]	[Met]	[Phe]	[Leu]	[Ile]	Average	% Asx	% Glx	% Ser	% Thr	% His	% Gly	% Arg	% Ala
											Modern	6.25188	3.05155	10.1792	2.023	0	25.7239	0.104996	0.818593	0	0	0	0	0	0	Modern	6.25188	3.05155	10.1792	2.023	0	25.7239	0.104996	0.818593	0	0	0	0	0	0	Modern	13.0254	6.70359	20.2307	4.72482	0	47.4877	2.36358	4.03731
											Post-medieval	13.712	6.15754	22.5976	6.80241	0	37.2799	6.36053	9.19221	0	0.150867	0	0.220046	0.17899	0.372876	Post-medieval	13.712	6.15754	22.5976	6.80241	0	37.2799	6.36053	9.19221	0	0.150867	0	0.220046	0.17899	0.372876	Post-medieval	14.1317	5.85899	20.2009	5.61992	0	37.6783	4.82563	8.85745
											Late Holocene	63.9979	36.7843	76.5263	34.4966	0	110.43	35.8824	57.5133	0	10.2244	0.630001	8.73851	8.14878	5.14959	Late Holocene	63.9979	36.7843	76.5263	34.4966	0	110.43	35.8824	57.5133	0	10.2244	0.630001	8.73851	8.14878	5.14959	Late Holocene	15.0922	6.615	21.5797	6.01581	0	39.951	3.72752	5.14514
											Early-Mid Holocene	221.408	72.3838	130.764	66.2854	0	206.646	100.339	156.695	1.51393	63.7938	0	35.75	34.8132	9.64533	Early-Mid Holocene	221.408	72.3838	130.764	66.2854	0	206.646	100.339	156.695	1.51393	63.7938	0	35.75	34.8132	9.64533	Early-Mid Holocene	14.149	6.91312	20.6223	5.2685	0	47.4444	2.16544	3.23898
											Standard deviation	[Asx]	[Glx]	[Ser]	[Thr]	[His]	[Gly]	[Arg]	[Ala]	[Tyr]	[Val]	[Met]	[Phe]	[Leu]	[Ile]	Standard deviation	[Asx]	[Glx]	[Ser]	[Thr]	[His]	[Gly]	[Arg]	[Ala]	[Tyr]	[Val]	[Met]	[Phe]	[Leu]	[Ile]	Standard deviation	% Asx	% Glx	% Ser	% Thr	% His	% Gly	% Arg	% Ala
											modern	2.58205	1.13083	5.71693	2.60083	0	7.9543	0.968013	2.52959	0	0	0	0	0	0	modern	2.58205	1.13083	5.71693	2.60083	0	7.9543	0.968013	2.52959	0	0	0	0	0	0	modern	1.69519	1.81513	4.65069	3.73888	0	14.1783	3.84717	5.48131
											Post-medieval	7.34126	3.34197	9.74312	3.87515	0	12.6538	6.23419	6.83173	0	0.769274	0	1.12202	0.912674	1.9013	Post-medieval	7.34126	3.34197	9.74312	3.87515	0	12.6538	6.23419	6.83173	0	0.769274	0	1.12202	0.912674	1.9013	Post-medieval	3.04356	0.856732	4.02015	2.45473	0	12.3311	4.67803	4.17394
											Late Holocene	40.9097	30.3057	62.8618	27.9917	0	93.2791	30.9031	46.4578	0	8.51547	0.630001	6.99356	6.38362	5.11017	Late Holocene	40.9097	30.3057	62.8618	27.9917	0	93.2791	30.9031	46.4578	0	8.51547	0.630001	6.99356	6.38362	5.11017	Late Holocene	2.61923	1.12328	5.23041	3.44136	0	15.0636	4.63298	5.98408
											Early-Mid Holocene	45.4089	30.7936	59.3416	28.3694	0	78.2113	42.7936	58.5161	0	24.1567	0	14.8912	13.741	5.54278	Early-Mid Holocene	45.4089	30.7936	59.3416	28.3694	0	78.2113	42.7936	58.5161	0	24.1567	0	14.8912	13.741	5.54278	Early-Mid Holocene	0.982797	0.586815	3.36104	3.49324	0	13.0041	3.31195	4.95706
[truncated: 22 more columns]

## Sheet: Bleaching
Average and standard deviation of amino acid concentration, percentage composition, extent of amino acid racemization (D/L) for free amino acid (FAA) and total hydrolisable amino acid (THAA) fraction for A. islandica from the North Sea used in bleaching experiments
All concentrations are reported in pmol/mg.
Lot number	Sample name	Lab ID	Area	Country	Latitude	Longitude	Age	Layer	Bleach time / h	FAA or THAA ?	n of samples	[Asx]	[Asx] 1 σ	[Glx]	[Glx] 1 σ	[Ser]	[Ser] 1 σ	[Thr]	[Thr] 1 σ	[His]	[His] 1 σ	[Gly]	[Gly] 1 σ	[Arg]	[Arg] 1 σ	[Ala]	[Ala] 1 σ	[Tyr]	[Tyr] 1 σ	[Val]	[Val] 1 σ	[Met]	[Met] 1 σ	[Phe]	[Phe] 1 σ	[Leu]	[Leu] 1 σ	[Ile]	[Ile] 1 σ	Total concentration	Total concentration 1 σ	Asx D/L	Asx D/L 1 σ	Glx D/L	Glx D/L 1 σ	Ser D/L	Ser D/L 1 σ	Ala D/L	Ala D/L 1 σ
20798	ArPeL1oOSL1u		North Sea	UK	58॰ 37’ N	1॰ 27’ E	modern	oOSL	0	FAA	3	36.8668	2.31318	23.6716	2.0248	46.5834	1.84064	10.1764	0.869462	0	0	112.721	6.02383	26.9604	5.14919	37.9647	3.11781	10.9533	0.763569	11.6356	2.13011	2.79551	0.541203	6.54672	0.548429	7.27149	0.732283	10.869	2.98662	345.016	24.712	0.258021	0.0108392	0.312098	0.0295159	0.356344	0.0410215	0.605318	0.0287486
20798	ArPeL1iOSL1u		North Sea	UK	58॰ 37’ N	1॰ 27’ E	modern	iOSL	0	FAA	3	28.0163	6.88848	18.9883	5.19571	32.7889	1.44744	7.59498	0.274312	0	0	86.7262	5.01043	25.9653	2.68559	38.4157	2.25748	10.0287	0.349768	10.4792	0.511491	2.73224	0.653925	4.68942	0.0252226	5.99799	0.260721	8.78195	1.0644	281.205	15.3562	0.310928	0.0105693	0.435568	0.0145627	0.331537	0.0226689	0.611608	0.0280638
20798	ArPeL1ISL1u		North Sea	UK	58॰ 37’ N	1॰ 27’ E	modern	ISL	0	FAA	3	33.7736	0.340014	27.4049	0.551028	25.4348	1.41195	7.60104	0.864174	0	0	101.493	4.14345	20.8159	5.84382	37.553	1.7286	9.5106	0.269588	14.526	1.30837	0	0	5.7832	1.19194	5.89123	0.218052	9.89242	0.760357	299.679	2.59195	0.352141	0.0149668	0.400384	0.0194785	0.215568	0.0276584	0.875579	0.00646435
20798	ArPeL1oOSL1b24		North Sea	UK	58॰ 37’ N	1॰ 27’ E	modern	oOSL	24	FAA	3	4.22434	0.844461	1.48151	1.17423	12.718	0.532861	0.912433	1.29038	0	0	25.3771	2.33712	0	0	0	0	0	0	0	0	0	0	0	0	0	0	0	0	44.7134	5.0475	0	0	#DIV/0!	#DIV/0!	0.458183	0.0442103	#DIV/0!	#DIV/0!
20798	ArPeL1iOSL1b24		North Sea	UK	58॰ 37’ N	1॰ 27’ E	modern	iOSL	24	FAA	3	6.36169	3.4795	2.38734	0.756298	20.5548	16.8857	2.93573	2.82812	0	0	28.3082	13.1744	0	0	4.30851	6.09315	0	0	0	0	0	0	0	0	0	0	0	0	64.8563	42.5017	0	0	0	0	0.351219	0.248634	#DIV/0!	#DIV/0!
20798	ArPeL1ISL1b24		North Sea	UK	58॰ 37’ N	1॰ 27’ E	modern	ISL	24	FAA	3	7.73081	0.506624	3.85381	0.244763	6.35322	0.366192	3.08936	0.671442	0	0	26.3391	4.11836	3.28531	2.43021	0	0	0	0	0	0	0	0	0	0	0	0	0	0	50.6516	1.84972	0.248434	0.0257528	0	0	0.559719	0.195209	#DIV/0!	#DIV/0!
20798	ArPeL1oOSL1b48		North Sea	UK	58॰ 37’ N	1॰ 27’ E	modern	oOSL	48	FAA	3	5.19876	0.664289	2.58592	0.516143	14.7504	1.01642	4.19829	1.60726	0	0	27.7738	1.33924	7.99432	0.713565	0	0	0	0	0	0	0	0	0	0	0	0	0	0	62.5014	4.94219	0	0	0	0	0.391822	0.0427115	#DIV/0!	#DIV/0!
20798	ArPeL1iOSL1b48		North Sea	UK	58॰ 37’ N	1॰ 27’ E	modern	iOSL	48	FAA	3	4.9879	3.39286	1.93697	1.37849	8.54735	0.702819	0	0	0	0	18.8225	1.7474	4.26078	3.43858	0	0	0	0	0	0	0	0	0	0	0	0	0	0	38.5555	9.80695	0.0560475	0.0792631	#DIV/0!	#DIV/0!	0.422707	0.0447578	#DIV/0!	#DIV/0!
20798	ArPeL1ISL1b48		North Sea	UK	58॰ 37’ N	1॰ 27’ E	modern	ISL	48	FAA	3	7.0608	0.183206	4.07034	0.0302954	4.75889	0.833501	0	0	0	0	20.889	11.1027	0	0	0	0	0	0	0	0	0	0	0	0	0	0	0	0	36.779	11.4918	0	0	0	0	0	0	#DIV/0!	#DIV/0!
20798	ArPeL1oOSL1b72		North Sea	UK	58॰ 37’ N	1॰ 27’ E	modern	oOSL	72	FAA	3	7.10603	1.03319	4.11756	0.530936	15.7618	0.692315	2.02903	2.86948	0	0	29.376	2.69751	8.44248	0.950993	0	0	0	0	0	0	0	0	0	0	0	0	0	0	66.8329	6.72102	0	0	0	0	0.41264	0.0202506	#DIV/0!	#DIV/0!
20798	ArPeL1iOSL1b72		North Sea	UK	58॰ 37’ N	1॰ 27’ E	modern	iOSL	72	FAA	3	2.97114	2.11932	1.6883	1.2119	7.02774	1.00746	0	0	0	0	18.9013	2.36238	3.4296	2.4929	0	0	0	0	0	0	0	0	0	0	0	0	0	0	34.0181	4.8703	#DIV/0!	#DIV/0!	#DIV/0!	#DIV/0!	0	0	#DIV/0!	#DIV/0!
20798	ArPeL1ISL1b72		North Sea	UK	58॰ 37’ N	1॰ 27’ E	modern	ISL	72	FAA	3	6.86336	0.149455	3.85695	0.0916245	4.32779	0.252661	0	0	0	0	30.3885	1.68929	0	0	0	0	0	0	0	0	0	0	0	0	0	0	0	0	45.4366	1.65733	0	0	0	0	0	0	#DIV/0!	#DIV/0!
20798	ArPeL1oOSL1u		North Sea	UK	58॰ 37’ N	1॰ 27’ E	modern	oOSL	0	THAA	3	4000.27	172.205	3079.17	167.277	1984.95	166.54	1816.87	148.674	0	0	15867.3	913.546	3477.98	201.746	2753.34	175.913	2949.36	245.803	1774.68	104.881	490.161	316.301	1056.79	44.5784	1262.52	59.0492	74.4483	7.64478	40587.8	1603.94	0.122866	0.000892373	0.0661762	0.000547501	0.0792097	0.00319432	0.0594405	0.00453592
20798	ArPeL1iOSL1u		North Sea	UK	58॰ 37’ N	1॰ 27’ E	modern	iOSL	0	THAA	3	2597.2	387.124	1901.63	236.258	1106.98	131.641	945.252	147.055	0	0	7145.26	3150.09	1953.79	264.132	2018.5	234.641	1281.05	417.499	1009.09	213.424	223.392	153.527	629.869	101.583	730.939	101.396	62.0415	30.3267	21605	3773.89	0.136932	0.00483116	0.0839785	0.00368258	0.0903798	0.00328842	0.0722282	0.00490357
20798	ArPeL1ISL1u		North Sea	UK	58॰ 37’ N	1॰ 27’ E	modern	ISL	0	THAA	3	4866.78	2148.5	4310.34	1205.93	2574.85	444.054	2791.38	679.373	0	0	7791.26	3395.07	3042.6	704.252	3705.71	743.437	2458	843.061	2484.89	849.542	632.959	228.433	1317.11	271.815	1619.12	308.461	89.6579	28.5492	37684.7	11466.9	0.152086	0.064249	0.0616514	0.0040789	0.0388638	0.00883204	0.0558713	0.00847412
20798	ArPeL1oOSL1b24		North Sea	UK	58॰ 37’ N	1॰ 27’ E	modern	oOSL	24	THAA	3	481.976	30.2345	359.049	22.5317	204.001	16.5485	212.031	17.3354	23.256	2.12759	269.355	21.791	303.544	21.4387	302.989	20.1693	96.8331	26.2533	286.398	18.4835	7.14714	2.85614	115.1	8.76352	144.593	10.9856	33.3102	1.10345	2839.58	210.271	0.127493	0.00181404	0.0624603	0.000579645	0.222424	0.00861862	0.0422774	0.00161064
20798	ArPeL1iOSL1b24		North Sea	UK	58॰ 37’ N	1॰ 27’ E	modern	iOSL	24	THAA	3	312.898	82.0126	212.779	37.9838	106.811	14.7109	111.213	15.3371	8.73636	1.46393	137.347	9.34186	184.032	31.9445	232.819	32.2486	44.7533	19.1464	178.487	26.2781	3.43112	4.85233	64.3592	12.0392	80.2433	14.0572	25.7335	3.46808	1703.64	297.602	0.196701	0.0830248	0.0708122	0.00120294	0.222169	0.0178429	0.0495243	0.00479283
20798	ArPeL1ISL1b24		North Sea	UK	58॰ 37’ N	1॰ 27’ E	modern	ISL	24	THAA	3	1177.87	144.148	861.172	103.519	400.107	52.0751	551.263	68.9947	39.9501	3.69318	707.32	50.5365	490.349	66.0733	631.264	81.8688	392.953	69.937	654.466	79.0105	15.1886	15.8203	208.247	27.9815	220.552	25.2482	47.9793	5.7549	6398.68	774.378	0.113697	0.00175588	0.0578802	0.0010979	0.179777	0.00244304	0.0447593	0.00425029
20798	ArPeL1oOSL1b48		North Sea	UK	58॰ 37’ N	1॰ 27’ E	modern	oOSL	48	THAA	3	440.356	45.7189	319.751	37.5602	196.266	24.282	195.082	11.9764	22.7871	5.6164	400.76	235.254	345.814	90.0407	278.718	21.7336	58.2712	14.3456	261.001	15.7382	0	0	105.773	7.02079	131.61	8.3742	40.6799	2.15745	2796.87	472.679	0.131241	0.00822699	0.0650577	0.00395254	0.257565	0.0165442	0.044275	0.00044075
20798	ArPeL1iOSL1b48		North Sea	UK	58॰ 37’ N	1॰ 27’ E	modern	iOSL	48	THAA	3	213.527	53.3486	144.855	46.9981	80.6533	16.5776	81.1164	23.1692	7.46983	1.90559	115.85	29.531	130.637	31.9101	169.962	43.5028	13.4074	5.20118	115.267	38.0219	0	0	44.25	12.9344	53.7386	14.4916	24.7331	1.81018	1195.47	309	0.139705	0.00462899	0.0704599	0.00353452	0.224243	0.0491326	0.0476134	0.00473348
20798	ArPeL1ISL1b48		North Sea	UK	58॰ 37’ N	1॰ 27’ E	modern	ISL	48	THAA	3	1356.76	231.163	951.909	207.313	461.683	71.51	628.21	107.403	43.1091	5.58524	794.205	143.856	513.348	87.5837	729.068	115.898	341.19	156.775	710.487	166.5	26.6003	15.8307	229.865	41.7134	239.501	39.921	39.9651	2.62298	7065.9	1344.55	0.119104	0.00349576	0.0559988	0.00325321	0.209465	0.00438153	0.0435993	0.00430202
20798	ArPeL1oOSL1b72		North Sea	UK	58॰ 37’ N	1॰ 27’ E	modern	oOSL	72	THAA	3	483.156	33.2173	356.182	21.0871	190.687	12.4562	208.793	9.51231	21.0584	4.38495	243.314	11.7649	309.101	20.6121	295.718	18.615	18.0674	10.0448	275.283	20.3351	0	0	109.562	15.5199	144.813	8.07913	43.1067	2.9736	2698.84	184.141	0.142269	0.00111098	0.0713	0.000555174	0.285517	0.00898683	0.0512745	0.00593247
20798	ArPeL1iOSL1b72		North Sea	UK	58॰ 37’ N	1॰ 27’ E	modern	iOSL	72	THAA	3	221.71	58.8447	151.297	54.6004	89.4687	5.21758	89.9711	8.91757	8.23931	2.12286	144.64	12.7474	127.415	27.9298	198.717	3.82621	14.2686	7.59542	137.486	14.5925	0	0	50.8425	4.03621	63.1118	3.79657	20.4069	7.51225	1317.57	176.09	0.14841	0.00244503	0.0808564	0.00358234	0.275241	0.0112758	0.0526486	0.00120445
20798	ArPeL1ISL1b72		North Sea	UK	58॰ 37’ N	1॰ 27’ E	modern	ISL	72	THAA	3	1424.48	61.0938	1031.08	40.7267	475.158	11.0464	654.958	29.4119	46.902	3.02205	786.988	64.8721	538.944	49.6131	755.605	15.1836	257.221	151.341	776.543	17.4161	7.93483	5.953	249.8	9.2277	256.884	8.76185	40.2087	12.3745	7302.7	46.8165	0.129485	0.000819717	0.0623636	0.00137604	0.221813	0.00290881	0.04336	0.00177323
20690	ArBroOSLuF		Bridlington beach	UK	54॰ 4’ N	0॰ 11’ W	modern, beach-collected	oOSL	0	FAA	2	27.0262	5.27463	17.817	2.08752	69.0255	9.1381	16.2938	2.13137	0	0	92.8109	4.66262	44.9055	4.1566	36.4082	3.11935	9.09872	1.69454	6.00233	0.0646066	0	0	7.01334	0.569548	7.11306	0.762272	10.1181	2.14918	343.633	31.512	0.168435	0.0141747	0.343875	0.141749	0.236166	0.000515575	0.230643	0.0186589
20690	ArBriOSLuF		Bridlington beach	UK	54॰ 4’ N	0॰ 11’ W	modern, beach-collected	iOSL	0	FAA	2	59.7441	2.53654	33.3875	1.80708	108.68	5.26872	26.2586	1.37514	0	0	110.951	4.43173	57.9314	4.27556	62.7405	1.6752	19.2104	1.10087	14.3454	0.850622	4.67631	0.250279	12.4646	0.703861	13.0883	0.879216	8.22242	0.199408	531.701	25.3542	0.186638	0.00300022	0.195759	0.00400447	0.155414	0.00217191	0.26562	0.0043891
20690	ArBrISLuF		Bridlington beach	UK	54॰ 4’ N	0॰ 11’ W	modern, beach-collected	ISL	0	FAA	2	26.681	1.93949	15.912	1.53056	48.373	2.91426	14.5757	0.843882	0	0	84.0052	1.37775	32.7507	3.64995	36.4444	1.62191	9.35494	0.814029	5.42226	0.553945	0	0	4.05753	0.246501	4.74528	0.819004	8.32173	0.0535127	290.644	16.3648	0.246253	0.006055	0.257025	0.0078078	0.2207	0.0017646	0.357054	0.00480468
20690	ArBroOSLb24F		Bridlington beach	UK	54॰ 4’ N	0॰ 11’ W	modern, beach-collected	oOSL	24	FAA	2	29.5386	4.34608	17.7579	4.17942	29.6322	1.38749	11.3645	3.11364	0	0	56.3091	3.23819	14.2883	4.62835	21.5359	2.57218	6.06619	1.93159	11.915	3.00903	3.37263	3.37263	9.27103	1.54746	9.56528	3.96624	12.418	2.58145	233.035	20.302	0.173674	0.0249186	0.0552197	0.0552197	0.261612	0.0115742	0.150185	0.0241421
20690	ArBriOSLb24F		Bridlington beach	UK	54॰ 4’ N	0॰ 11’ W	modern, beach-collected	iOSL	24	FAA	2	22.7047	4.23141	13.0944	2.45592	29.8337	5.32354	8.42937	1.57174	0	0	45.3649	4.25543	16.6132	4.56411	19.8944	3.85976	2.35871	0.824065	5.66667	1.09085	0	0	4.78925	0.870872	5.38421	1.00038	8.32971	0.490901	182.463	30.539	0.163273	0.000586257	0.128737	0.0119478	0.294442	0.00621675	0.123896	0.00525068
20690	ArBrISLb24F		Bridlington beach	UK	54॰ 4’ N	0॰ 11’ W	modern, beach-collected	ISL	24	FAA	2	8.41932	0.258449	5.76454	0.379266	14.1618	1.03319	5.12726	0.348398	0	0	28.2689	1.39884	6.78443	1.73612	8.18836	0.0773951	0.744687	0.744687	3.12659	0.451995	0	0	2.4113	0.204349	2.67116	2.67116	3.5688	3.5688	89.2372	3.25653	0	0	0.0754022	0.0754022	0.259011	0.0344488	0	0
20690	ArBroOSLb48F		Bridlington beach	UK	54॰ 4’ N	0॰ 11’ W	modern, beach-collected	oOSL	48	FAA	2	7.30814	0.0113247	3.58076	0.252764	18.2758	1.30298	2.36037	2.36037	0	0	38.6594	0.234038	4.99378	4.99378	5.01431	5.01431	1.06427	1.06427	3.13928	3.13928	0.95352	0.95352	3.56475	0.394151	1.70442	1.70442	0	0	90.6188	20.897	0.0725652	0.0725652	0	0	0.352119	0.00505291	#DIV/0!	#DIV/0!
20690	ArBriOSLb48F		Bridlington beach	UK	54॰ 4’ N	0॰ 11’ W	modern, beach-collected	iOSL	48	FAA	2	11.9978	0.79607	5.39141	0.10637	20.4003	4.73836	6.04781	0.632071	0	0	39.7389	3.94647	5.50349	0.106967	14.56	0.0605472	1.65181	1.65181	1.1767	1.1767	0	0	1.67276	1.67276	1.57069	1.57069	0	0	109.712	16.4588	0.169776	0.00289898	0	0	0.323751	0.0288169	0.117957	0.0117503
20690	ArBrISLb48F		Bridlington beach	UK	54॰ 4’ N	0॰ 11’ W	modern, beach-collected	ISL	48	FAA	2	4.59053	2.16792	2.63539	1.26285	11.2678	0.771468	4.86686	0.206132	0	0	29.0339	1.77122	4.98642	1.73826	6.91834	1.57104	0.65205	0.65205	0	0	0	0	0	0	0	0	0	0	64.9513	5.12149	0	0	0	0	0.405318	0.0231653	0.0795585	0.0795585
20690	ArBroOSLb72F		Bridlington beach	UK	54॰ 4’ N	0॰ 11’ W	modern, beach-collected	oOSL	72	FAA	2	6.70406	3.07641	3.71975	1.06295	23.0413	6.35768	5.77901	0.415194	0	0	40.2098	6.74334	9.91695	2.2692	7.15417	1.13548	0	0	1.17459	1.17459	0	0	3.23363	0.474201	1.83641	1.83641	0	0	102.77	20.0071	0	0	0	0	0.320343	0.0732629	0	0
20690	ArBriOSLb72F		Bridlington beach	UK	54॰ 4’ N	0॰ 11’ W	modern, beach-collected	iOSL	72	FAA	2	11.0582	3.06897	5.40629	1.23248	17.5371	3.45953	4.75783	0.134373	0	0	37.7728	5.32736	6.12328	0.521013	9.16703	2.83782	0	0	0	0	0	0	0	0	0	0	0	0	91.8225	16.5816	0.0808537	0.0808537	0	0	0.387927	0.00105069	0.196504	0.0430456
20690	ArBrISLb72F		Bridlington beach	UK	54॰ 4’ N	0॰ 11’ W	modern, beach-collected	ISL	72	FAA	2	5.57597	1.71113	3.13851	0.956882	12.4226	1.31147	4.87661	0.200283	0	0	32.6433	2.10718	5.53057	0.140003	7.00018	1.7143	0	0	0	0	0	0	0	0	0	0	0	0	71.1878	8.14126	0	0	0	0	0.348935	0.00525997	0.224283	0.0293641
20690	ArBroOSLuH*		Bridlington beach	UK	54॰ 4’ N	0॰ 11’ W	modern, beach-collected	oOSL	0	THAA	2	1754.56	137.357	1273.52	110.734	1383.19	111.048	1802.04	127.533	724.704	17.7544	2490.17	234.646	1876.03	101.995	2042.09	154.073	348.717	122.252	1245.29	85.6485	380.699	128.065	598.288	38.9731	877.408	61.2084	10.6412	1.47036	16807.3	1188.25	0.111913	0.000874732	0.0508907	9.10897e-06	0.130949	0.000797296	0.0470136	0.00124542
20690	ArBriOSLuH*		Bridlington beach	UK	54॰ 4’ N	0॰ 11’ W	modern, beach-collected	iOSL	0	THAA	2	2767.99	182.32	2109.78	160.635	1337.04	17.4474	1550.42	44.3002	697.838	43.9283	2565.17	183.168	1602.31	49.6226	2195.86	69.6517	441.696	248.061	1170.43	15.4962	221.296	11.7936	563.611	17.9197	841.171	2.41328	6.78638	0.309497	18071.4	1023.48	0.12367	0.000934748	0.0604973	0.00336768	0.105986	0.00441451	0.0518967	0.00121066
20690	ArBrISLuH*		Bridlington beach	UK	54॰ 4’ N	0॰ 11’ W	modern, beach-collected	ISL	0	THAA	2	2887.91	185.737	2004.93	150.33	1439.4	50.2076	1887.36	65.6071	753.953	30.1482	2788.23	111.067	1862.58	53.2094	2248.77	72.0566	939.065	5.07787	1365.59	42.8238	168.964	30.8991	690.772	24.7435	770.549	23.7739	5.87165	0.225494	19813.9	845.906	0.119085	0.000385588	0.0577674	6.00132e-05	0.107813	0.000835144	0.0551936	0.0016105
20690	ArBroOSLb24H*		Bridlington beach	UK	54॰ 4’ N	0॰ 11’ W	modern, beach-collected	oOSL	24	THAA	2	315.187	147.945	216.782	89.4314	175.933	14.7954	181.289	0.567236	54.2445	7.0846	324.763	52.9006	218.556	48.8076	277.446	6.14874	3.00309	3.00309	187.938	1.80804	26.6573	26.6573	89.3482	2.83509	139.188	4.04255	14.9671	6.88715	2225.3	207.882	0.141939	0.00762308	0.0612579	0.00589478	0.243796	0.0150377	0.0472709	0.00328386
20690	ArBriOSLb24H*		Bridlington beach	UK	54॰ 4’ N	0॰ 11’ W	modern, beach-collected	iOSL	24	THAA	2	325.048	36.918	213.381	32.3308	122.502	19.2448	145.31	19.8449	50.3914	3.38513	227.773	30.3745	167.865	29.4959	277.964	42.6433	76.2514	66.0185	125.565	4.81505	38.2536	27.1418	31.1916	27.1834	93.2849	14.1218	7.70198	0.304973	1902.48	235.542	0.14866	0.00171444	0.0665373	0.000857607	0.280085	0.00982866	0.0826444	0.0342972
20690	ArBrISLb24H*		Bridlington beach	UK	54॰ 4’ N	0॰ 11’ W	modern, beach-collected	ISL	24	THAA	2	456.07	51.668	306.46	8.16554	247.279	19.9724	315.122	36.9208	100.396	4.93622	449.157	21.5005	298.139	30.7652	378.582	53.7206	46.288	11.6386	289.424	29.0049	149.484	7.62061	132.523	11.4802	130.701	11.2356	11.3363	3.60472	3310.96	252.024	0.113418	0.00356484	0.0530196	0.00316863	0.213417	0.00698507	0.0440841	0.00385307
20690	ArBroOSLb48H*		Bridlington beach	UK	54॰ 4’ N	0॰ 11’ W	modern, beach-collected	oOSL	48	THAA	2	192.162	97.6992	125.02	75.9943	167.291	31.2373	159.358	13.396	50.8165	4.13988	335.168	82.1775	183.42	10.8119	245.362	22.5387	13.5054	1.31884	169.098	13.4945	81.3052	10.2793	87.1327	11.5366	63.1995	50.1504	14.7478	5.19381	1887.59	329.668	0.141978	0.000135108	0.0700359	0.00674795	0.239103	0.0454711	0.0509067	0.000329197
20690	ArBriOSLb48H*		Bridlington beach	UK	54॰ 4’ N	0॰ 11’ W	modern, beach-collected	iOSL	48	THAA	2	329.577	33.8109	219.431	11.345	120.556	12.7442	140.678	18.7662	45.7819	15.4784	223.066	11.28	162.183	48.2893	255.931	21.781	39.2279	24.4926	147.162	20.8709	51.5565	7.6703	68.1248	8.87944	97.7871	13.7563	7.93751	0.258215	1909	211.522	0.159731	0.00015279	0.0728609	0.000648607	0.277633	0.00219887	0.0557697	0.00579571
20690	ArBrISLb48H*		Bridlington beach	UK	54॰ 4’ N	0॰ 11’ W	modern, beach-collected	ISL	48	THAA	2	463.908	47.1792	294.235	46.034	245.085	58.8568	254.817	131.772	52.6915	52.6915	345.366	101.646	292.904	91.0592	337.661	122.066	9.10561	9.10561	213.419	132.953	85.3897	80.6861	98.1848	61.8383	106.987	57.9785	7.77582	0.00225679	2807.53	993.868	0.0994308	0.0168784	0.0469635	0.00854911	0.221305	0.00817031	0.0399937	0.00225075
20690	ArBroOSLb72H*		Bridlington beach	UK	54॰ 4’ N	0॰ 11’ W	modern, beach-collected	oOSL	72	THAA	2	262.857	34.2736	224.85	67.5729	223.59	3.9833	158.75	18.7978	56.9997	17.2742	474.21	86.8713	184.828	52.9806	241.004	24.6436	14.5496	2.1184	172.755	16.8478	48.326	10.3038	89.6415	8.72655	154.548	4.14858	23.5178	11.0022	2330.43	52.0987	0.14327	0.000687459	0.0627346	0.00103485	0.150739	0.0258571	0.0605438	0.00805139
20690	ArBriOSLb72H*		Bridlington beach	UK	54॰ 4’ N	0॰ 11’ W	modern, beach-collected	iOSL	72	THAA	2	324.876	51.0492	224.301	29.7601	108.666	8.11199	125.641	16.9738	45.4609	4.98567	228.746	15.6452	120.4	14.4127	241.103	29.341	1.72964	1.72964	131.229	14.1304	22.7999	22.7999	57.9978	2.61481	86.2178	8.67862	7.37993	0.205628	1726.55	171.38	0.16444	6.51605e-05	0.0804371	0.000369505	0.298406	0.021524	0.0515604	0.00267643
20690	ArBrISLb72H*		Bridlington beach	UK	54॰ 4’ N	0॰ 11’ W	modern, beach-collected	ISL	72	THAA	2	540.126	73.7735	351.233	60.1114	211.829	4.2931	253.062	6.22913	71.9355	5.18268	431.339	34.9749	225.018	26.9193	338.901	7.67192	8.40152	1.7078	241.696	7.7229	138.381	3.27206	110.575	2.58967	111.11	3.30494	9.94383	1.53243	3043.55	121.824	0.13153	0.00164616	0.0653687	0.00014007	0.237869	0.00601639	0.0479683	0.00131196
1787	ArWeyoOSLuF		Weybourne Crag		52° 56.55’ N	1° 08.33’ E	Early Pleistocene	oOSL	0	FAA	2	376.751	57.6191	120.896	20.0706	21.2608	3.32522	22.952	1.70722	9.99924	1.46919	379.132	55.122	246.119	30.4013	808.059	60.9355	123.861	5.05169	378.986	36.9159	57.2722	19.9182	121.58	15.2276	118.993	24.3854	7.62811	0.0405123	2793.49	312.497	0.849392	0.000868783	0.626475	0.0102385	0.295732	0.119839	1.06071	0.0095117
1787	ArWeyiOSLuF		Weybourne Crag		52° 56.55’ N	1° 08.33’ E	Early Pleistocene	iOSL	0	FAA	2	409.546	67.5327	138.363	20.473	18.2839	7.02584	22.1327	0.318536	14.8826	1.17055	392.352	84.8411	243.132	5.91193	808.422	71.8772	133.236	9.46659	378.901	35.6143	41.4964	15.337	120.145	17.1954	112.122	24.9045	7.69503	0.0969101	2840.71	149.791	0.854865	0.00234543	0.631622	0.00498966	0.388341	0.194244	1.06031	0.0196955
1787	ArWeyISLuF		Weybourne Crag		52° 56.55’ N	1° 08.33’ E	Early Pleistocene	ISL	0	FAA	2	510.801	84.1933	137.676	17.8408	7.05563	0.5119	23.8985	3.4989	3.53057	3.53057	410.425	75.03	94.7387	15.9408	549.395	60.0706	119.512	17.9586	268.967	43.5546	35.9859	8.65997	76.0846	15.52	54.6941	7.04402	13.399	6.42513	2306.16	352.718	0.883819	0.000530788	0.643996	0.00913865	0.856814	0.856814	0.981929	0.0615289
1787	ArWeyoOSLb24F		Weybourne Crag		52° 56.55’ N	1° 08.33’ E	Early Pleistocene	oOSL	24	FAA	2	194.499	30.9474	64.6561	9.81448	5.31817	0.327081	12.4942	2.75581	13.9625	5.41271	239.457	68.4444	157.951	42.8724	441.819	104.615	47.5625	27.0434	212.333	56.5781	20.197	9.64756	70.8403	19.0257	70.5715	24.3306	7.60706	0.118178	1559.27	382.401	0.855755	0.00152887	0.644285	0.000288453	1.29659	0.0117994	1.0799	0.0150798
1787	ArWeyiOSLb24F		Weybourne Crag		52° 56.55’ N	1° 08.33’ E	Early Pleistocene	iOSL	24	FAA	2	233.525	70.74	77.6283	27.0954	4.60426	1.09877	7.10404	2.80067	0	0	163.184	47.4432	91.1898	53.5233	278.393	93.5265	16.8477	6.18715	125.808	48.7491	0	0	43.1075	17.1405	42.1464	20.4914	7.53021	0.0321521	1091.07	388.764	0.858239	0.00259431	0.647472	0.0064763	0.939192	0.172127	1.04785	0.0252282
1787	ArWeyISLb24F		Weybourne Crag		52° 56.55’ N	1° 08.33’ E	Early Pleistocene	ISL	24	FAA	2	332.695	69.3279	87.2455	15.8439	5.8232	0.722237	14.4057	2.75945	9.3923	1.98577	258.344	62.5748	60.2913	11.7078	344.663	76.51	53.9369	34.4159	161.819	33.2304	19.2475	19.2475	44.302	9.3071	34.8618	7.09136	7.71339	0.274495	1434.74	306.504	0.893476	0.000642974	0.654567	0.00520087	1.25452	0.16781	0.957733	0.0255061
1787	ArWeyoOSLb48F		Weybourne Crag		52° 56.55’ N	1° 08.33’ E	Early Pleistocene	oOSL	48	FAA	2	323.423	168.605	110.116	56.698	6.89978	1.07041	16.9581	5.74279	19.5181	10.1561	273.3	106.486	179.987	61.0843	489.369	156.83	62.7219	29.5362	238.325	80.4203	17.151	4.35574	82.5816	28.4038	80.5823	33.2694	7.30755	0.160571	1908.24	733.786	0.846724	0.0070607	0.6198	0.010178	1.20035	0.626118	1.05048	0.00474608
1787	ArWeyiOSLb48F		Weybourne Crag		52° 56.55’ N	1° 08.33’ E	Early Pleistocene	iOSL	48	FAA	2	258.457	115.912	91.384	46.2468	5.37644	0.93919	9.90293	2.62355	6.69493	6.69493	179.668	75.508	106.175	12.8808	303.429	74.3204	27.8502	12.0835	139.665	30.6857	6.91139	6.91139	48.2983	13.4581	45.5599	15.928	7.77508	0.42597	1237.15	413.766	0.85028	0.00547886	0.626505	0.0107172	1.18096	0.17472	1.04775	0.0118156
1787	ArWeyISLb48F		Weybourne Crag		52° 56.55’ N	1° 08.33’ E	Early Pleistocene	ISL	48	FAA	2	411.421	40.7498	111.747	10.812	12.3516	5.78709	19.1065	3.75695	0	0	354.094	76.7725	76.1152	11.4444	455.23	53.5957	62.1821	34.5303	208.214	24.1682	3.32424	3.32424	63.707	13.5422	45.6149	7.38405	21.0665	13.3685	1844.17	292.588	0.883498	0.015441	0.634622	0.0275021	0.757877	0.331105	0.907508	0.0034384
1787	ArWeyoOSLb72F		Weybourne Crag		52° 56.55’ N	1° 08.33’ E	Early Pleistocene	oOSL	72	FAA	2	249.153	162.193	83.5048	52.6104	3.12902	3.12902	17.2292	1.28744	14.9832	14.9832	223.01	131.084	154.465	86.4209	378.045	214.284	49.6064	30.8653	188.646	108.486	170.305	166.635	62.7504	35.5421	63.6375	39.9966	7.53125	0.0988645	1666	1045.04	0.869327	0.00121228	0.637455	0.0106713	#DIV/0!	#DIV/0!	1.13063	0.0494465
1787	ArWeyiOSLb72F		Weybourne Crag		52° 56.55’ N	1° 08.33’ E	Early Pleistocene	iOSL	72	FAA	2	109.762	24.0001	28.8939	2.70642	5.162	2.72141	9.6094	5.63165	1.96021	1.96021	187.097	102.095	52.1857	7.07269	259.078	118.835	18.2524	9.69487	116.926	54.9205	13.4523	6.47291	36.3507	13.8986	26.1556	10.242	10.3404	2.76547	875.226	359.096	0.871808	0.00972437	0.654049	0.00935011	0.35225	0.35225	0.965969	0.0919726
1787	ArWeyISLb72F		Weybourne Crag		52° 56.55’ N	1° 08.33’ E	Early Pleistocene	ISL	72	FAA	2	303.261	113.861	89.5078	24.4711	5.28743	0.301096	15.6341	3.45916	6.45763	6.45763	242.238	22.052	133.435	15.5833	400.605	0.898292	27.5036	3.73957	200.24	6.85368	18.5295	1.06052	61.9802	3.74161	56.9771	8.77505	8.17603	0.125052	1569.83	138.346	0.872944	0.0229566	0.639739	0.0138124	1.67454	0.0434399	1.04847	0.00505789
1787	ArWeyoOSLuH*		Weybourne Crag		52° 56.55’ N	1° 08.33’ E	Early Pleistocene	oOSL	0	THAA	2	695.241	52.8759	814.842	14.1918	276.865	7.01349	1048.85	409.495	76.1385	1.37443	1089.73	80.9847	412.789	48.1796	1593.95	286.482	147.635	4.96628	764.912	78.8764	113.941	7.396	328.684	41.584	410.891	79.2037	7.99055	0.071361	7782.46	1001.54	0.533188	0.0394846	0.387736	0.00486127	0.0608117	0.00728319	0.526779	0.10471
1787	ArWeyiOSLuH*		Weybourne Crag		52° 56.55’ N	1° 08.33’ E	Early Pleistocene	iOSL	0	THAA	2	643.882	72.9222	783.612	88.1218	285.617	4.81615	677.992	164.894	37.7926	0	871.132	56.9792	569.485	22.19	1098.07	121.047	89.0644	8.85788	610.361	57.078	98.2239	13.5109	262.056	21.621	346.788	24.9926	10.5665	0.74555	6384.64	619.632	0.516868	0.0374367	0.35581	0.0405084	0.0610268	0.141366	0.595536	0.0570533
1787	ArWeyISLuH*		Weybourne Crag		52° 56.55’ N	1° 08.33’ E	Early Pleistocene	ISL	0	THAA	2	731.609	100.001	668.41	88.1544	137.905	41.0004	160.25	58.9765	33.3613	1.65524	647.118	114.068	306.033	15.6385	709.494	92.2336	107.19	40.0864	449.14	62.2435	76.0657	36.9689	164.812	32.306	188.24	50.7638	11.2037	3.43147	4390.83	657.355	0.610588	0.0626316	0.424204	0.0380894	4.96997	4.91723	0.728953	0.0960835
1787	ArWeyoOSLb24H*		Weybourne Crag		52° 56.55’ N	1° 08.33’ E	Early Pleistocene	oOSL	24	THAA	2	396.388	167.762	445.246	185.742	30.6859	11.0126	612.565	408.266	36.8233	20.1208	440.384	205.13	263.544	113.359	796.343	351.381	72.8759	38.9937	420.653	175.427	50.7485	14.1113	171.949	72.3959	164.97	78.4913	8.03043	0.11666	3911.21	1842.31	0.74747	0.00919117	0.549313	0.00993816	0.42922	0.0627111	0.791388	0.0616757
1787	ArWeyiOSLb24H*		Weybourne Crag		52° 56.55’ N	1° 08.33’ E	Early Pleistocene	iOSL	24	THAA	2	230.58	72.9222	238.702	88.1218	24.8347	4.81615	227.095	164.894	0	0	198.413	56.9792	165.609	22.19	340.121	121.047	20.5756	8.85788	194.085	57.078	13.5109	13.5109	77.8101	21.621	79.166	24.9926	7.84351	0.74555	1818.35	619.632	0.693884	0.0374367	0.491501	0.0405084	0.141366	0.141366	0.856152	0.0570533
1787	ArWeyISLb24H*		Weybourne Crag		52° 56.55’ N	1° 08.33’ E	Early Pleistocene	ISL	24	THAA	2	406.372	28.9153	348.107	25.3261	35.8713	9.65184	65.9626	18.931	6.32425	6.32425	336.767	102.387	170.502	6.35605	416.945	78.3888	113.993	32.371	273.51	43.2129	19.6242	2.89923	94.3481	19.4518	80.187	19.3093	13.7464	5.08067	2382.26	380.158	0.755237	0.0133192	0.536782	0.0138305	0.201485	0.0255291	0.961629	0.0456853
1787	ArWeyoOSLb48H*		Weybourne Crag		52° 56.55’ N	1° 08.33’ E	Early Pleistocene	oOSL	48	THAA	2	451.367	158.042	506.825	155.991	36.345	3.14682	650.255	298.883	37.6635	4.48403	453.561	90.6326	306.932	74.8142	870.881	177.38	32.9712	0.711099	455.22	97.7312	79.4576	7.05676	181.877	41.4432	175.035	47.9697	8.78834	0.573977	4247.18	1156.29	0.743805	0.00897278	0.554362	0.0100523	0.405795	0.0557892	0.768289	0.0388193
1787	ArWeyiOSLb48H*		Weybourne Crag		52° 56.55’ N	1° 08.33’ E	Early Pleistocene	iOSL	48	THAA	2	217.061	21.9259	224.07	12.2247	33.0202	3.39275	205.714	110.914	11.9357	11.9357	216.686	62.8463	179.712	40.9367	382.428	85.1707	11.0588	2.61197	226.469	50.7487	45.9586	0.930907	95.0391	21.3423	88.6454	28.2682	8.52256	0.00990518	1946.32	383.096	0.691774	0.00113702	0.500175	0.00933965	0.159791	0.0231891	0.852727	0.0426445
1787	ArWeyISLb48H*		Weybourne Crag		52° 56.55’ N	1° 08.33’ E	Early Pleistocene	ISL	48	THAA	2	301.456	51.5902	281.495	7.2912	58.1439	26.5374	61.4886	10.5273	0	0	377.416	118.886	124.677	28.0643	382.003	26.9211	29.7539	3.24659	232.252	0.524177	50.8119	3.67943	87.1654	7.71676	84.1784	16.0427	21.3488	13.0341	2092.19	139.122	0.685847	0.0608851	0.475902	0.0646024	0.0889694	0.0889694	0.835975	0.14716
1787	ArWeyoOSLb72H*		Weybourne Crag		52° 56.55’ N	1° 08.33’ E	Early Pleistocene	oOSL	72	THAA	2	321.175	79.564	369.936	77.9133	27.852	2.19493	528.698	277.701	30.698	11.9398	366.317	127.445	152.152	75.2382	689.031	203.626	20.6452	12.6314	369.775	105.026	68.1168	8.89907	155.472	46.0491	140.615	49.1342	8.25812	0.116461	3248.74	1077.24	0.742344	0.0136453	0.549145	0.0146558	0.456489	0.124799	0.754326	0.0315006
1787	ArWeyiOSLb72H*		Weybourne Crag		52° 56.55’ N	1° 08.33’ E	Early Pleistocene	iOSL	72	THAA	2	412.01	243.318	378.684	202.592	17.9553	4.47404	76.0848	9.03339	5.08351	5.08351	229.364	134.038	112.923	4.57843	323.144	80.1198	32.5953	2.3946	189.645	40.0983	28.2727	12.5856	77.7161	13.4743	117.783	55.6367	31.0947	11.9304	2032.36	642.042	0.756987	0.0231983	0.535938	0.0194267	0.146962	0.146962	0.817466	0.0396543
1787	ArWeyISLb72H*		Weybourne Crag		52° 56.55’ N	1° 08.33’ E	Early Pleistocene	ISL	72	THAA	2	416.526	94.3841	398.255	46.3929	25.0387	0.33333	267.324	214.658	16.9202	0.567898	283.454	64.4128	150.66	54.5885	502.793	34.6902	19.2134	5.97037	284.232	18.843	49.012	7.22869	112.534	15.5966	180.964	112.684	48.4189	39.2244	2755.34	272.13	0.7617	0.0290364	0.548146	0.0123803	0.312436	0.0140547	0.766436	0.0735009
[truncated: 30 more columns]

## Sheet: High temperature
Average and standard deviation of amino acid concentration, percentage composition, extent of amino acid racemization (D/L) for free amino acid (FAA) and total hydrolisable amino acid (THAA) fraction for A. islandica from the North Sea used in bleaching experiments
All concentrations are reported in pmol/mg.
Lot number	Sample name	Lab ID	Area	Country	Latitude	Longitude	Age	Layer	Bleach time / h	Temperature / °C	Heating time / h	FAA or THAA ?	n of samples	[Asx]	[Asx] 1 σ	[Glx]	[Glx] 1 σ	[Ser]	[Ser] 1 σ	[Thr]	[Thr] 1 σ	[His]	[His] 1 σ	[Gly]	[Gly] 1 σ	[Arg]	[Arg] 1 σ	[Ala]	[Ala] 1 σ	[Tyr]	[Tyr] 1 σ	[Val]	[Val] 1 σ	[Met]	[Met] 1 σ	[Phe]	[Phe] 1 σ	[Leu]	[Leu] 1 σ	[Ile]	[Ile] 1 σ	Total concentration	Total concentration 1 σ	Asx D/L	Asx D/L 1 σ	Glx D/L	Glx D/L 1 σ	Ser D/L	Ser D/L 1 σ
20798	ArPeoOSLb8kFp		North Sea	UK	58॰ 37’ N	1॰ 27’ E	modern	oOSL	48	140	8	FAA	3	82.1996	40.2296	25.7824	12.9584	35.3818	2.51995	16.902	1.31117	4.47165	1.25948	119.259	9.13724	96.0922	9.11714	114.342	7.32078	35.7374	2.82724	39.6167	3.66527	0	0	23.2904	2.64687	16.0353	7.08471	12.6973	0.233506	621.808	77.6147	0.500215	0.127865	0.418973	0.0150625	0.877152	0.0418894
20798	ArPeiOSLb8kFp		North Sea	UK	58॰ 37’ N	1॰ 27’ E	modern	iOSL	48	140	8	FAA	3	76.5897	24.1374	21.3353	8.84884	25.6539	5.11585	11.6649	2.30917	2.71914	0.193165	98.3912	4.15028	49.0043	17.576	96.9091	21.3474	26.3311	7.70066	28.6756	7.98102	0	0	18.3943	3.14075	16.4842	4.84482	10.1573	2.29002	482.31	106.55	0.5782	0.123575	0.421067	0.0100135	0.905222	0.0245293
20798	ArPeISLb8kFp		North Sea	UK	58॰ 37’ N	1॰ 27’ E	modern	ISL	48	140	8	FAA	3	189.772	27.4321	56.5061	8.10706	68.0513	9.26441	47.3046	6.19642	3.83372	0.863734	252.409	12.0955	102.032	16.8551	232.782	33.47	45.7959	9.80148	58.8462	8.37216	2.80292	2.22919	26.3047	3.13395	24.2295	3.35625	11.9956	0.44085	1122.67	130.265	0.400394	0.00746225	0.405598	0.00439533	0.915329	0.0136721
20798	ArPeoOSLb24kFp		North Sea	UK	58॰ 37’ N	1॰ 27’ E	modern	oOSL	48	140	24	FAA	3	206.711	56.6841	39.9962	12.5284	22.7339	1.39369	17.2929	1.76631	7.31194	1.91135	166.569	10.9141	153.966	4.86292	202.331	16.0012	64.2205	2.83637	90.9512	8.28002	2.63228	2.2447	47.538	4.44478	39.6916	1.00353	20.7584	0.111159	1082.7	96.432	0.815439	0.0043762	0.546749	0.00793407	0.947971	0.0155617
20798	ArPeiOSLb24kFp		North Sea	UK	58॰ 37’ N	1॰ 27’ E	modern	iOSL	48	140	24	FAA	3	109.03	12.8431	24.0473	3.84192	15.0998	2.42293	9.51987	1.66586	3.13024	0.897233	143.545	14.3948	49.7902	10.2665	167	24.1676	31.2609	16.3496	56.6204	5.96792	5.43183	5.19723	27.3883	1.67448	21.6678	2.26962	15.6788	1.51996	679.211	85.2382	0.814253	0.00766323	0.586428	0.0125046	0.87887	0.0424822
20798	ArPeISLb24kFp		North Sea	UK	58॰ 37’ N	1॰ 27’ E	modern	ISL	48	140	24	FAA	3	331.603	126.29	61.1906	16.0193	44.9422	16.4211	41.5513	13.7366	4.0217	1.06793	360.026	110.255	89.1406	33.944	356.263	114.474	90.4068	27.9817	132.835	42.4637	2.71666	2.74508	51.5608	15.8175	34.3299	10.5972	18.453	3.05638	1619.04	522.55	0.697908	0.168371	0.506157	0.0237171	0.966036	0.135472
20798	ArPeoOSLb48kFp		North Sea	UK	58॰ 37’ N	1॰ 27’ E	modern	oOSL	48	140	48	FAA	3	141.298	40.0527	32.4698	18.0849	11.3491	1.46738	10.4327	2.43511	2.58694	0.604121	209.718	22.6982	128.691	20.7501	210.971	25.6528	55.9836	7.98248	99.3168	7.95603	2.0367	2.88033	42.1446	2.24218	36.3041	4.92847	22.8229	1.35844	1006.13	66.559	0.843343	0.0100255	0.636303	0.00224169	1.05564	0.125396
20798	ArPeiOSLb48kFp		North Sea	UK	58॰ 37’ N	1॰ 27’ E	modern	iOSL	48	140	48	FAA	3	135.537	8.76977	22.3478	2.81964	10.6901	1.05973	9.79371	0.409433	3.02877	0.722987	188.895	8.27365	106.148	23.3451	213.4	5.74623	52.1315	3.58839	79.5374	4.25994	0	0	32.5986	1.61389	28.5798	2.58009	19.2585	0.856985	901.946	32.7132	0.845955	0.00360752	0.650107	0.00382506	0.97594	0.0483384
20798	ArPeISLb48kFp		North Sea	UK	58॰ 37’ N	1॰ 27’ E	modern	ISL	48	140	48	FAA	3	481.172	9.83731	63.3121	4.28436	45.3191	0.691488	49.7886	1.77176	2.77492	0.508071	639.483	23.9589	86.0176	4.08418	585.452	19.2748	115.927	45.2265	216.51	10.3924	14.448	20.4326	64.7291	3.22038	49.7749	7.68471	26.5679	0.877399	2441.28	100.032	0.892019	0.00334062	0.599521	0.00888094	1.0929	0.0654625
20798	ArPeoOSLb8kH*p		North Sea	UK	58॰ 37’ N	1॰ 27’ E	modern	oOSL	48	140	8	THAA	3	293.561	64.909	236.018	63.5915	69.3478	5.89111	104.051	9.66156	13.6126	3.02512	329.764	29.9492	179.026	26.6043	296.594	28.9046	68.2403	14.2308	201.728	10.0186	37.351	14.1095	91.3855	4.53889	110.959	5.09062	22.3996	2.437	2054.04	141.934	0.604302	0.0759496	0.296792	0.0325498	0.745225	0.0902072
20798	ArPeiOSLb8kH*p		North Sea	UK	58॰ 37’ N	1॰ 27’ E	modern	iOSL	48	140	8	THAA	3	251.644	14.9267	163.149	11.7417	56.1736	1.9436	76.4491	3.30372	11.2577	1.10961	276.424	9.20172	129.658	15.1016	265.448	11.0394	55.6977	10.0865	162.088	5.72569	41.5884	3.74922	73.2402	2.87739	80.008	11.5351	18.1815	0.330212	1661.01	45.7009	0.592595	0.0762142	0.289571	0.0209592	0.748609	0.110676
20798	ArPeISLb8kH*p		North Sea	UK	58॰ 37’ N	1॰ 27’ E	modern	ISL	48	140	8	THAA	3	994.781	72.5257	737.376	53.2683	215.747	8.40826	313.245	11.2078	59.2901	14.3144	767.948	16.74	467.259	37.6996	656.057	40.17	419.894	14.9425	589.075	23.3111	31.2492	10.4961	207.993	11.5954	200.394	6.48823	24.9545	4.90728	5685.26	204.534	0.718786	0.00982585	0.248774	0.00476077	0.705006	0.0101328
20798	ArPeoOSLb24kH*p		North Sea	UK	58॰ 37’ N	1॰ 27’ E	modern	oOSL	48	140	24	THAA	3	376.047	108.361	380.455	136.746	28.9846	2.37529	63.8092	3.24149	18.3105	10.1024	330.14	31.5493	151.176	39.7177	282.09	18.4053	63.9381	25.9014	180.794	2.2678	25.6026	15.9933	80.463	1.7561	83.8524	2.10869	29.324	2.07982	2094.98	247.763	0.780265	0.000995899	0.443684	0.00835271	0.889471	0.0606539
20798	ArPeiOSLb24kH*p		North Sea	UK	58॰ 37’ N	1॰ 27’ E	modern	iOSL	48	140	24	THAA	3	191.659	31.7098	169.825	33.1363	17.001	3.54426	29.4228	4.26012	9.89152	5.78413	229.415	20.7614	72.6687	5.71326	224.185	22.1372	38.8143	14.7267	125.09	8.40786	21.4486	8.634	65.995	16.1065	41.5669	21.2329	18.0119	7.63477	1254.99	110.652	0.750682	0.0245664	0.462109	0.019342	0.868011	0.022052
20798	ArPeISLb24kH*p		North Sea	UK	58॰ 37’ N	1॰ 27’ E	modern	ISL	48	140	24	THAA	3	887.149	72.0219	743.781	40.6716	129.705	21.5554	223.161	42.554	62.4002	14.0016	834.81	48.3863	352.336	29.6238	767.946	49.9001	411.623	31.429	572.501	29.4929	49.6879	22.7248	199.984	8.37253	132.05	85.6774	44.2651	6.43763	5411.4	306.971	0.691385	0.14036	0.362052	0.0547045	0.696666	0.170667
20798	ArPeoOSLb48kH*p		North Sea	UK	58॰ 37’ N	1॰ 27’ E	modern	oOSL	48	140	48	THAA	3	152.911	9.07208	164.213	7.72306	18.7722	3.10479	61.1768	2.77033	26.0434	2.18487	285.392	4.76974	159.389	20.8323	334.439	15.6569	43.3804	22.4373	231.367	23.8072	0	0	86.103	5.97423	86.34	9.26125	38.4458	2.01072	1687.97	42.0515	0.803248	0.0325869	0.514146	0.0059209	0.725567	0.16669
20798	ArPeiOSLb48kH*p		North Sea	UK	58॰ 37’ N	1॰ 27’ E	modern	iOSL	48	140	48	THAA	3	116.052	22.7186	101.847	23.457	12.5955	0.542089	25.9165	1.22845	17.0687	1.31017	234.478	10.8902	46.2074	3.19281	232.299	9.00436	41.0712	12.3946	110.097	4.94521	20.1992	7.50271	46.6593	1.77729	41.2934	1.89193	21.1004	0.57017	1066.89	79.0605	0.795941	0.0106834	0.515093	0.0057615	0.554004	0.131612
20798	ArPeISLb48kH*p		North Sea	UK	58॰ 37’ N	1॰ 27’ E	modern	ISL	48	140	48	THAA	3	549.664	168.198	505.106	152.081	72.4258	3.99609	123.09	15.3884	50.5623	10.5705	974.039	74.6667	251.233	32.0342	827.856	98.0119	262.399	58.7091	545.153	78.737	23.3554	5.94637	174.853	22.7741	136.934	15.3433	56.5145	5.34854	4553.19	554.448	0.867273	0.0126886	0.51166	0.00922964	0.907996	0.133735
[truncated: 46 more columns]

## Sheet: Framework+ontogeny
Amino acid concentration, percentage composition, extent of amino acid racemization (D/L) for free amino acid (FAA) and total hydrolisable amino acid (THAA) fraction for A. islandica from the North Sea used in bleaching experiments
(samples with the same Lab ID are analytical replicates)
All concentrations are reported in pmol/mg.
Lot number	Sample name	Lab ID	Area	Country	Latitude	Longitude	Age	Dating method	Layer	Bleach time / h	Ontogeny	FAA or THAA ?	Asx D/L	Glx D/L	Ser D/L	Val D/L	[Asx]	[Glx]	[Ser]	[Thr]	[His]	[Gly]	[Arg]	[Ala]	[Tyr]	[Val]	[Met]	[Phe]	[Leu]	[Ile]	Total concentration	% Asx	% Glx	% Ser	% Thr	% His	% Gly	% Arg	% Ala	% Tyr	% Val	% Met	%Phe	% Ile	% Leu
20690	ArBriOSL1b48F	15035bF	Bridlington beach	UK	54॰ 4’ N	0॰ 11’ W	Modern ?		iOSL	48		FAA	0.172675	0	0.352567	#DIV/0!	11.2018	5.28504	15.6619	5.41574	0	35.7924	5.39652	14.4995	0	0	0	0	0	0	93.2529	12.0123	5.66743	16.7951	5.80759	0	38.3821	5.78698	15.5485	0	0	0	0	0	0
20690	ArBriOSL2b48F	15036bF	Bridlington beach	UK	54॰ 4’ N	0॰ 11’ W	Modern ?		iOSL	48		FAA	0.166877	0	0.294934	0	12.7939	5.49778	25.1387	6.67988	0	43.6853	5.61046	14.6205	3.30361	2.3534	0	3.34551	3.14137	0	126.17	10.1402	4.35743	19.9244	5.29433	0	34.6241	4.44673	11.5879	2.61837	1.86525	0	2.65158	2.48978	0
20798	ArPeL1iOSL1b48	14827bF	North Sea		58॰ 37’ N	1॰ 27’ E	Modern		iOSL	48		FAA	0.168142	0	0.484933	#DIV/0!	9.42969	3.09642	8.1231	0	0	21.2222	8.42098	0	0	0	0	0	0	0	50.2924	18.7497	6.15684	16.1517	0	0	42.1976	16.744	0	0	0	0	0	0	0
20798	ArPeL1iOSL2b48	14828bF	North Sea		58॰ 37’ N	1॰ 27’ E	Modern		iOSL	48		FAA	0	0	0.381551	#DIV/0!	4.33867	2.71449	9.53789	0	0	18.1337	4.36136	0	0	0	0	0	0	0	39.0861	11.1003	6.94489	24.4022	0	0	46.3943	11.1583	0	0	0	0	0	0	0
20798	ArPeL1iOSL3b48	14829bF	North Sea		58॰ 37’ N	1॰ 27’ E	Modern		iOSL	48		FAA	0	#DIV/0!	0.401639	#DIV/0!	1.19534	0	7.98105	0	0	17.1116	0	0	0	0	0	0	0	0	26.2879	4.54709	0	30.3601	0	0	65.0928	0	0	0	0	0	0	0	0
20890	ArNsM1A1bF	15278bF	North Sea	UK	58॰ 37’ N	1॰ 27’ E	Modern		iOSL	48	early	FAA	0.186331	0	0.460249	#DIV/0!	7.78912	2.90786	9.08269	3.53985	0	21.4751	8.87296	4.58048	0	0	0	0	0	0	58.2481	13.3723	4.9922	15.5931	6.07719	0	36.8684	15.2331	7.86374	0	0	0	0	0	0
20890	ArNsM1A1bF	15278bF	North Sea	UK	58॰ 37’ N	1॰ 27’ E	Modern		iOSL	48	early	FAA	0.176284	0	0.299536	#DIV/0!	7.57489	2.95375	8.24156	2.72278	0	18.7914	9.52136	8.43608	0	0	0	0	0	0	58.2418	13.0059	5.07153	14.1506	4.67496	0	32.2645	16.348	14.4846	0	0	0	0	0	0
20890	ArNsM1A2bF	15279bF	North Sea	UK	58॰ 37’ N	1॰ 27’ E	Modern		iOSL	48	late	FAA	0	0	0.314416	#DIV/0!	6.48921	3.52777	10.4586	4.74882	0	31.7526	16.0093	3.98956	0	0	0	0	0	0	76.9759	8.43019	4.58296	13.5868	6.16924	0	41.2501	20.7978	5.18287	0	0	0	0	0	0
20890	ArNsM1A2bF	15279bF	North Sea	UK	58॰ 37’ N	1॰ 27’ E	Modern		iOSL	48	late	FAA	0.135103	0	0.24399	0	10.2395	5.60946	11.3504	4.68147	0	25.222	10.5629	17.5446	0	2.92879	0	0	0	0	88.1391	11.6175	6.36432	12.8778	5.31146	0	28.6161	11.9844	19.9055	0	3.32291	0	0	0	0
20888	ArNsM2C1bF	15280bF	North Sea	UK	58॰ 37’ N	1॰ 27’ E	Modern		iOSL	48	early	FAA	0	0	0.419826	#DIV/0!	4.23364	2.07408	7.00458	2.4736	0	22.3655	9.99045	4.08248	0	0	0	0	0	0	52.2244	8.10664	3.97148	13.4125	4.73649	0	42.8259	19.1299	7.81719	0	0	0	0	0	0
20888	ArNsM2C1bF	15280bF	North Sea	UK	58॰ 37’ N	1॰ 27’ E	Modern		iOSL	48	early	FAA	0.207888	0	0.300028	#DIV/0!	5.60961	1.95181	6.6126	2.09133	0	17.7369	9.64525	4.3449	0	0	0	0	0	0	47.9924	11.6885	4.0669	13.7784	4.35763	0	36.9578	20.0974	9.0533	0	0	0	0	0	0
20888	ArNsM2C2bF	15281bF	North Sea	UK	58॰ 37’ N	1॰ 27’ E	Modern		iOSL	48	late	FAA	0	0	0.440797	#DIV/0!	6.27069	2.53554	8.51118	3.38616	0	21.3089	9.91182	2.96456	0	0	0	0	0	0	54.8889	11.4243	4.6194	15.5062	6.16913	0	38.8219	18.058	5.40103	0	0	0	0	0	0
20888	ArNsM2C2bF	15281bF	North Sea	UK	58॰ 37’ N	1॰ 27’ E	Modern		iOSL	48	late	FAA	0.153849	0	0.335938	#DIV/0!	7.65164	2.64641	7.91897	3.7097	0	16.8238	0	0	0	0	0	0	0	0	38.7505	19.7459	6.82936	20.4358	9.5733	0	43.4156	0	0	0	0	0	0	0	0
20889	ArNsM3A1bF	15282bF	North Sea	UK	58॰ 37’ N	1॰ 27’ E	Modern		iOSL	48	early	FAA	0.291487	0	0.348942	#DIV/0!	6.09679	3.09699	6.91163	3.89737	0	21.8576	8.64076	3.63333	0	0	0	0	0	0	54.1344	11.2623	5.72093	12.7675	7.19943	0	40.3764	15.9617	6.71168	0	0	0	0	0	0
20889	ArNsM3A1bF	15282bF	North Sea	UK	58॰ 37’ N	1॰ 27’ E	Modern		iOSL	48	early	FAA	0.270816	0	0.280141	#DIV/0!	6.91586	2.96721	7.10927	6.47327	0	18.5762	4.77745	3.89204	0	0	0	0	0	0	50.7113	13.6377	5.85118	14.0191	12.765	0	36.6313	9.42089	7.67489	0	0	0	0	0	0
20889	ArNsM3A2bF	15283bF	North Sea	UK	58॰ 37’ N	1॰ 27’ E	Modern		iOSL	48	late	FAA	0.166345	0.348441	0.459632	#DIV/0!	8.3867	3.92728	5.59092	2.84508	0	28.9825	8.6305	3.75664	0	0	0	0	0	0	62.1196	13.5009	6.32213	9.00025	4.58001	0	46.6559	13.8934	6.04742	0	0	0	0	0	0
20889	ArNsM3A2bF	15283bF	North Sea	UK	58॰ 37’ N	1॰ 27’ E	Modern		iOSL	48	late	FAA	0.169926	0.233817	0.261724	0	17.1764	9.07865	8.49621	5.3529	0	26.2202	11.3761	10.6974	0	6.27541	0	2.53182	0	9.84445	107.05	16.0452	8.48079	7.9367	5.00039	0	24.4935	10.627	9.99298	0	5.86215	0	2.3651	0	9.19616
20891	ArIcP1A1bF	15274bF	North Icelandic Shelf	Iceland	66° 31.59’ N	18° 11.74’ W	Post-medieval		iOSL	48	early	FAA	0.223548	0	0.435886	#DIV/0!	8.22667	4.2716	11.7099	3.88165	0	28.4372	3.86541	8.53228	0	0	0	0	0	0	68.9247	11.9357	6.19749	16.9894	5.63172	0	41.2584	5.60817	12.3791	0	0	0	0	0	0
20891	ArIcP1A1bF	15274bF	North Icelandic Shelf	Iceland	66° 31.59’ N	18° 11.74’ W	Post-medieval		iOSL	48	early	FAA	0.224808	0	0.379777	#DIV/0!	8.18418	3.76084	11.4116	4.91535	0	23.6326	7.40643	9.46972	0	0	0	0	0	0	68.7806	11.899	5.46788	16.5912	7.14642	0	34.3593	10.7682	13.768	0	0	0	0	0	0
20891	ArIcP1A2bF	15275bF	North Icelandic Shelf	Iceland	66° 31.59’ N	18° 11.74’ W	Post-medieval		iOSL	48	late	FAA	0.256553	0.316139	0.448458	#DIV/0!	16.2341	11.0346	15.9973	5.57063	0	63.9598	16.5256	16.5606	0	0	0	0	0	0	145.882	11.1282	7.56403	10.9659	3.81857	0	43.8434	11.328	11.352	0	0	0	0	0	0
20891	ArIcP1A2bF	15275bF	North Icelandic Shelf	Iceland	66° 31.59’ N	18° 11.74’ W	Post-medieval		iOSL	48	late	FAA	0.269871	0.454161	0.367595	#DIV/0!	17.3828	11.7426	15.7712	5.9362	0	49.6364	18.2609	15.765	0	0	0	0	0	0	134.495	12.9245	8.73088	11.7263	4.41369	0	36.9057	13.5774	11.7216	0	0	0	0	0	0
20892	ArIcP2B1bF	15276bF	North Icelandic Shelf	Iceland	66° 31.59’ N	18° 11.74’ W	Post-medieval		iOSL	48	early	FAA	0.270252	0.740842	0.442899	#DIV/0!	6.18869	4.8773	10.1444	3.22501	0	23.9628	6.38186	7.31294	0	0	0	0	0	0	62.093	9.96681	7.85483	16.3375	5.19384	0	38.5918	10.2779	11.7774	0	0	0	0	0	0
20892	ArIcP2B1bF	15276bF	North Icelandic Shelf	Iceland	66° 31.59’ N	18° 11.74’ W	Post-medieval		iOSL	48	early	FAA	0.239437	0	0.334312	#DIV/0!	6.11305	2.95414	9.93994	3.42702	0	23.3198	7.48834	7.46448	0	0	0	0	0	0	60.7068	10.0698	4.86625	16.3737	5.6452	0	38.4138	12.3353	12.296	0	0	0	0	0	0
20892	ArIcP2B2bF	15277bF	North Icelandic Shelf	Iceland	66° 31.59’ N	18° 11.74’ W	Post-medieval		iOSL	48	late	FAA	0.134652	0.426941	0.379248	#DIV/0!	11.3954	6.47617	15.1514	5.25298	0	29.2788	10.4454	7.64482	0	0	0	0	0	0	85.645	13.3054	7.56164	17.6909	6.13343	0	34.1862	12.1962	8.92616	0	0	0	0	0	0
20892	ArIcP2B2bF	15277bF	North Icelandic Shelf	Iceland	66° 31.59’ N	18° 11.74’ W	Post-medieval		iOSL	48	late	FAA	0.133234	0.466315	0.316275	#DIV/0!	11.6399	6.7371	16.0104	4.60879	0	25.7699	9.41462	8.64627	0	0	0	0	0	0	82.827	14.0533	8.13394	19.3299	5.56435	0	31.113	11.3666	10.439	0	0	0	0	0	0
21269	ArNIS061746bF	16215bF	North Icelandic Shelf	Iceland	66° 31.59’ N	18° 11.74’ W	Late Holocene		iOSL	48		FAA	0.314722	0	0.456247	#DIV/0!	20.3003	10.1063	37.1306	15.6273	0	48.9685	10.7867	26.5946	0	0	0	0	0	0	169.514	11.9756	5.96189	21.9041	9.21887	0	28.8875	6.3633	15.6887	0	0	0	0	0	0
21270	ArNIS061305bF	16216bF	North Icelandic Shelf	Iceland	66° 31.59’ N	18° 11.74’ W	Late Holocene		iOSL	48		FAA	0.386227	0	0.511496	0	31.4465	13.3339	42.4043	17.3217	0	59.2193	10.8215	27.7371	0	7.50581	0	3.93374	4.44993	0	218.174	14.4135	6.11158	19.436	7.9394	0	27.1432	4.96006	12.7133	0	3.44029	0	1.80303	2.03963	0
21271	ArNIS061617bF	16217bF	North Icelandic Shelf	Iceland	66° 31.59’ N	18° 11.74’ W	Late Holocene		iOSL	48		FAA	0.33122	0	0.561499	0	35.5878	16.0211	50.0734	20.7242	0	72.5617	14.9055	34.2709	0	6.27051	0	4.5423	5.55179	0	260.509	13.6608	6.14993	19.2214	7.95527	0	27.8538	5.72167	13.1553	0	2.40702	0	1.74362	2.13113	0
21272	ArNIS061407bF	16218bF	North Icelandic Shelf	Iceland	66° 31.59’ N	18° 11.74’ W	Late Holocene		iOSL	48		FAA	0.261212	0	0.503603	0	14.6708	8.34853	25.2692	10.9778	0	43.1966	7.94508	20.9223	0	3.91624	0	0	0	0	135.247	10.8474	6.17282	18.6838	8.1169	0	31.9392	5.87451	15.4697	0	2.89563	0	0	0	0
21273	ArNIS061711bF	16219bF	North Icelandic Shelf	Iceland	66° 31.59’ N	18° 11.74’ W	Late Holocene		iOSL	48		FAA	0.253384	0	0.414158	0	7.87252	6.11301	33.0629	13.0591	0	47.4711	5.76605	19.5692	0	3.18587	0	0	0	0	136.1	5.78438	4.49156	24.2931	9.59527	0	34.8797	4.23664	14.3786	0	2.34084	0	0	0	0
20886	ArNsP1A1bF	15268bF	Fladen Ground	UK	58.831° N	−0.356° E	Mid-Holocene		iOSL	48	early	FAA	0.506213	0.143586	0.793262	0.17422	53.4463	26.5267	44.4811	32.1255	0	104.245	27.6042	67.1026	0	18.1924	0	7.97348	0	9.74649	391.444	13.6536	6.77663	11.3633	8.20692	0	26.631	7.0519	17.1423	0	4.64752	0	2.03694	0	2.48988
20886	ArNsP1A1bF	15268bF	Fladen Ground	UK	58.831° N	−0.356° E	Mid-Holocene		iOSL	48	early	FAA	0.495584	0.218433	0.797588	0.23336	57.5965	30.4069	46.602	33.8356	0	85.5725	47.8117	71.2863	6.47235	25.4404	3.66283	14.6724	11.7014	14.7732	449.834	12.8039	6.75958	10.3598	7.52178	0	19.0231	10.6287	15.8472	1.43883	5.65551	0.814262	3.26174	2.60128	3.28415
20886	ArNsP1A2bF	15269bF	Fladen Ground	UK	58.831° N	−0.356° E	Mid-Holocene		iOSL	48	late	FAA	0.507298	0.162396	0.908366	0.159748	95.2134	41.2949	73.8443	41.1801	0	124.685	40.9297	99.9449	0	37.0465	0	16.9265	16.7065	9.97318	597.745	15.9288	6.90845	12.3538	6.88925	0	20.8592	6.84736	16.7203	0	6.19772	0	2.83172	2.79493	1.66847
20886	ArNsP1A2bF	15269bF	Fladen Ground	UK	58.831° N	−0.356° E	Mid-Holocene		iOSL	48	late	FAA	0.512119	0.214215	0.87632	0.182449	109.514	33.7007	61.8657	40.2141	0	41.5717	29.9131	129.58	7.67788	50.9271	3.29716	24.584	20.4944	16.1265	569.466	19.2311	5.91794	10.8638	7.06171	0	7.30012	5.25283	22.7546	1.34826	8.94296	0.578992	4.31703	3.59887	2.83186
20885	ArNsP2A1bF	15270bF	Fladen Ground	UK	58.831° N	−0.356° E	Mid-Holocene		iOSL	48	early	FAA	0.489766	0.152578	0.844458	0.308431	73.6871	34.0294	80.7681	52.5483	0	143.204	56.5779	112.596	10.6465	30.9767	0	8.9066	11.6771	14.3435	629.962	11.6971	5.40182	12.8211	8.3415	0	22.7322	8.98117	17.8735	1.69002	4.91724	0	1.41383	1.85362	2.27688
20885	ArNsP2A1bF	15270bF	Fladen Ground	UK	58.831° N	−0.356° E	Mid-Holocene		iOSL	48	early	FAA	0.49128	0.15425	0.805848	0.132975	77.1629	33.29	80.9432	57.3978	3.78922	109.437	74.0636	113.485	0	29.0338	0	11.4167	11.8834	16.0134	617.916	12.4876	5.38746	13.0994	9.28894	0.613226	17.7106	11.986	18.3658	0	4.69866	0	1.84761	1.92314	2.59152
20885	ArNsP2A2bF	15271bF	Fladen Ground	UK	58.831° N	−0.356° E	Mid-Holocene		iOSL	48	late	FAA	0.504581	0.160378	0.884597	0.16629	49.6405	21.0147	35.2344	21.2287	0	66.2781	21.7668	50.2449	0	17.6889	0	8.37729	7.71739	9.31226	308.504	16.0907	6.8118	11.421	6.88117	0	21.4837	7.05561	16.2866	0	5.73378	0	2.71546	2.50155	3.01852
20885	ArNsP2A2bF	15271bF	Fladen Ground	UK	58.831° N	−0.356° E	Mid-Holocene		iOSL	48	late	FAA	0.512322	0.210861	0.827536	0.218959	53.3338	23.1617	34.7564	22.7168	0	51.5411	31.9982	54.0531	1.6067	22.0877	0	10.0106	8.92146	14.1354	328.323	16.2443	7.05454	10.586	6.91905	0	15.6983	9.74595	16.4634	0.489366	6.72742	0	3.049	2.71728	4.30535
20887	ArNsP3A1bF	15272bF	Fladen Ground	UK	58.831° N	−0.356° E	Mid-Holocene		iOSL	48	early	FAA	0.495084	0.120773	0.858051	0.121473	56.2052	25.2007	48.0537	30.7472	0	90.6001	42.2265	84.7074	0	21.353	0	10.1928	12.2135	12.713	434.213	12.9441	5.80375	11.0668	7.08112	0	20.8654	9.72484	19.5083	0	4.91763	0	2.34742	2.81279	2.92783
20887	ArNsP3A1bF	15272bF	Fladen Ground	UK	58.831° N	−0.356° E	Mid-Holocene		iOSL	48	early	FAA	0.513622	0.134974	0.814698	0.105563	59.0327	25.5352	48.3412	32.8195	0	70.4125	51.5757	83.6497	0	22.555	0	10.1815	12.5373	14.1402	430.78	13.7037	5.92767	11.2218	7.61862	0	16.3453	11.9726	19.4182	0	5.23585	0	2.36349	2.91036	3.28246
20887	ArNsP3A2bF	15273bF	Fladen Ground	UK	58.831° N	−0.356° E	Mid-Holocene		iOSL	48	late	FAA	0.495801	0.165199	0.869726	0.147204	64.5876	25.8722	43.1818	25.4721	0	80.5591	30.7339	63.3482	0	20.3068	0	9.44043	9.4214	12.0121	384.936	16.7788	6.72117	11.2179	6.61723	0	20.9279	7.98417	16.4568	0	5.27538	0	2.45247	2.44753	3.12056
20887	ArNsP3A2bF	15273bF	Fladen Ground	UK	58.831° N	−0.356° E	Mid-Holocene		iOSL	48	late	FAA	0.508868	0.172452	0.795818	0.167383	66.3133	25.6084	42.4046	26.8521	0	57.2434	36.7371	60.4992	0	22.2153	0	9.35632	9.36447	13.8768	370.471	17.8997	6.91239	11.4461	7.2481	0	15.4515	9.91632	16.3304	0	5.9965	0	2.52552	2.52772	3.74571
20965	ArNs0658bF	15641bF	Fladen Ground	UK	58° 50’ N	0° 21.35’ W	Mid-Holocene		iOSL	48		FAA	0.5063	0.154054	0.864885	0.156454	67.5449	27.28	44.3563	25.627	0	73.8252	26.9672	57.7639	0	23.196	0	11.9704	14.7102	11.6547	384.896	17.5489	7.08763	11.5242	6.65815	0	19.1806	7.00636	15.0077	0	6.02656	0	3.11002	3.82188	3.02802
20965	ArNs0658bF	15641bF	Fladen Ground	UK	58° 50’ N	0° 21.35’ W	Mid-Holocene		iOSL	48		FAA	0.505781	0.163101	0.879692	0.130198	68.212	28.4067	44.3676	26.2397	0	73.9448	31.6347	61.933	0	23.1451	0	12.3047	14.1129	12.0349	396.336	17.2106	7.16733	11.1944	6.62057	0	18.6571	7.98178	15.6264	0	5.83977	0	3.10462	3.56084	3.03654
20966	ArNs0684bF	15643bF	Fladen Ground	UK	58.831° N	−0.356° E	Mid-Holocene		iOSL	48		FAA	0.500354	0.15028	0.860444	0.147732	105.938	45.4609	79.2272	47.1747	0	111.604	51.6478	99.0672	0	36.6168	0	16.8601	22.5767	17.7513	633.925	16.7115	7.17134	12.4979	7.44168	0	17.6052	8.1473	15.6276	0	5.77621	0	2.65964	3.56142	2.80022
20966	ArNs0684bF	15643bF	Fladen Ground	UK	58.831° N	−0.356° E	Mid-Holocene		iOSL	48		FAA	0.492358	0.147498	0.87546	0.148763	105.771	44.9954	79.3792	47.5664	0	104.805	53.7092	94.8285	0	36.5358	0	17.1509	26.0269	17.2775	628.046	16.8412	7.16435	12.6391	7.57372	0	16.6875	8.5518	15.099	0	5.81738	0	2.73084	4.14411	2.751
1787	ArWeyiOSL1b48F	15052bF	Weybourne Crag	UK	52° 56.55’ N	1° 08.33’ E	Early Pleistocene 2.2-2.1 Ma		iOSL	48		FAA	0.855759	0.637222	1.35568	0.730054	374.369	137.631	6.31563	12.5265	13.3899	255.176	119.056	377.749	39.9338	170.351	13.8228	61.7564	61.4879	7.34911	1650.91	22.6765	8.33664	0.382554	0.75876	0.811057	15.4567	7.21151	22.8812	2.41889	10.3186	0.837281	3.74074	3.72448	0.445154
1787	ArWeyiOSL2b48F	15081bF	Weybourne Crag	UK	52° 56.55’ N	1° 08.33’ E	Early Pleistocene 2.2-2.1 Ma		iOSL	48		FAA	0.844801	0.615788	1.00624	0.755107	142.546	45.1373	4.43725	7.27938	0	104.16	93.2941	229.108	15.7667	108.98	0	34.8403	29.632	8.20105	823.381	17.3122	5.48194	0.538906	0.884084	0	12.6503	11.3306	27.8253	1.91487	13.2356	0	4.23136	3.59882	0.996021
21282	ArEw1bF	16645bF	Easton Wood	UK	52° 21.43' N	1° 41.52' E	Early Pleistocene 2.35-2.25 Ma			48		FAA	0.679992	0	#DIV/0!	0.811522	13.0656	3.46098	0	0	0	87.3023	25.4593	151.942	0	60.1995	0	15.2443	42.351	22.5489	421.573	3.09925	0.820967	0	0	0	20.7087	6.03912	36.0415	0	14.2797	0	3.61604	10.0459	5.34874
21282	ArEw2bF	16646bF	Easton Wood	UK	52° 21.43' N	1° 41.52' E	Early Pleistocene 2.35-2.25 Ma			48		FAA	0.905494	0.65207	#DIV/0!	0.852784	130.195	31.9061	0	33.7385	0	228.401	59.0113	373.773	0	162.333	0	53.5009	81.6013	41.4866	1195.95	10.8864	2.66785	0	2.82107	0	19.0979	4.93428	31.2533	0	13.5736	0	4.47352	6.82315	3.46893
21282	ArEw3bF	16647bF	Easton Wood	UK	52° 21.43' N	1° 41.52' E	Early Pleistocene 2.35-2.25 Ma			48		FAA	0.901833	0.655522	#DIV/0!	0.891605	176.336	51.0432	0	61.7221	0	328.87	118.929	638.068	117.475	312.813	0	97.3135	152.473	66.0673	2121.11	8.3134	2.40644	0	2.9099	0	15.5046	5.60691	30.0818	5.53837	14.7476	0	4.58786	7.18834	3.11475
21282	ArEw4bF	16648bF	Easton Wood	UK	52° 21.43' N	1° 41.52' E	Early Pleistocene 2.35-2.25 Ma			48		FAA	0.812896	0.655412	#DIV/0!	0.935293	51.0713	17.5731	0	0	0	97.8701	31.8188	219.273	0	95.417	0	30.8925	44.2432	28.2025	616.362	8.28593	2.8511	0	0	0	15.8787	5.16235	35.5754	0	15.4807	0	5.01208	7.17812	4.57565
21282	ArEw5bF	16649bF	Easton Wood	UK	52° 21.43' N	1° 41.52' E	Early Pleistocene 2.35-2.25 Ma			48		FAA	0.923495	0	#DIV/0!	1.03975	7.89242	2.53391	0	0	0	23.9039	0	32.1129	0	14.0131	0	0	0	0	80.4563	9.80958	3.14942	0	0	0	29.7104	0	39.9135	0	17.4171	0	0	0	0
21282	ArEw6bF	16650bF	Easton Wood	UK	52° 21.43' N	1° 41.52' E	Early Pleistocene 2.35-2.25 Ma			48		FAA	0.901633	0.715651	#DIV/0!	0.886566	126.298	35.0158	0	45.3632	0	238.193	70.1144	475.682	34.5056	215.436	0	62.0011	85.9866	46.2111	1434.81	8.80244	2.44045	0	3.16162	0	16.6011	4.88668	33.153	2.4049	15.015	0	4.32121	5.9929	3.22072
21282	ArEw7bF	16651bF	Easton Wood	UK	52° 21.43' N	1° 41.52' E	Early Pleistocene 2.35-2.25 Ma			48		FAA	0.901112	0.753489	#DIV/0!	0.956491	59.8479	16.5907	0	0	0	65.6117	11.3526	102.817	0	44.2247	0	19.1515	24.1817	17.9694	361.748	16.5441	4.58626	0	0	0	18.1374	3.13826	28.4224	0	12.2253	0	5.29415	6.68469	4.9674
21282	ArEw8bF	16652bF	Easton Wood	UK	52° 21.43' N	1° 41.52' E	Early Pleistocene 2.35-2.25 Ma			48		FAA	0.91443	0.700406	#DIV/0!	0.915709	45.2914	18.7867	0	0	0	53.0537	6.58418	67.1657	0	29.6893	0	11.7904	17.431	15.38	265.172	17.08	7.0847	0	0	0	20.0073	2.48298	25.3291	0	11.1962	0	4.44633	6.57344	5.79998
21282	ArEw9bF	16653bF	Easton Wood	UK	52° 21.43' N	1° 41.52' E	Early Pleistocene 2.35-2.25 Ma			48		FAA	0.878637	0.729952	#DIV/0!	0.964128	24.426	7.8957	0	4.84528	0	35.5162	4.08858	40.5481	0	19.2875	0	8.0216	4.46265	7.9073	156.999	15.5581	5.02914	0	3.08618	0	22.6219	2.60421	25.827	0	12.2851	0	5.10934	2.84247	5.03653
21282	ArEw10bF	16654bF	Easton Wood	UK	52° 21.43' N	1° 41.52' E	Early Pleistocene 2.35-2.25 Ma			48		FAA	0.915337	0.721397	#DIV/0!	0.851406	80.1255	22.5136	0	13.5884	0	109.864	40.3431	200.335	0	91.1866	0	30.6991	40.0708	25.8978	654.623	12.2399	3.43916	0	2.07575	0	16.7827	6.16279	30.6031	0	13.9296	0	4.68958	6.1212	3.95613
21282	ArEw11bF	16655bF	Easton Wood	UK	52° 21.43' N	1° 41.52' E	Early Pleistocene 2.35-2.25 Ma			48		FAA	0.902164	0.62585	#DIV/0!	0.852169	104.806	29.301	0	40.751	0	227.787	92.402	454.196	22.8555	220.4	0	71.7042	121.513	54.2428	1439.96	7.27841	2.03485	0	2.83001	0	15.819	6.41699	31.5423	1.58723	15.306	0	4.9796	8.43867	3.76697
21282	ArEw12bF	16656bF	Easton Wood	UK	52° 21.43' N	1° 41.52' E	Early Pleistocene 2.35-2.25 Ma			48		FAA	0.926058	0.681101	#DIV/0!	0.858172	102.921	27.3578	0	15.2414	0	95.6856	18.5448	143.863	11.6948	61.4959	0	24.0404	31.3684	21.1374	553.351	18.5996	4.94402	0	2.75439	0	17.292	3.35136	25.9985	2.11344	11.1134	0	4.34451	5.6688	3.8199
21282	ArEw13bF	16657bF	Easton Wood	UK	52° 21.43' N	1° 41.52' E	Early Pleistocene 2.35-2.25 Ma			48		FAA	0.907768	0.665093	#DIV/0!	0.884039	165.058	49.1282	0	42.3938	0	211.037	88.2187	385.976	0	184.79	0	63.7172	106.966	52.4737	1349.76	12.2287	3.63978	0	3.14085	0	15.6352	6.53589	28.5959	0	13.6906	0	4.72064	7.92481	3.88764
21282	ArEw14bF	16658bF	Easton Wood	UK	52° 21.43' N	1° 41.52' E	Early Pleistocene 2.35-2.25 Ma			48		FAA	0.860286	0.576297	#DIV/0!	0.880912	59.6363	24.4284	0	49.7015	0	253.8	91.2224	522.691	0	270.958	0	73.2414	121.174	49.4967	1516.35	3.93289	1.611	0	3.27771	0	16.7375	6.01592	34.4704	0	17.8691	0	4.83011	7.99115	3.2642
21282	ArEw15bF	16659bF	Easton Wood	UK	52° 21.43' N	1° 41.52' E	Early Pleistocene 2.35-2.25 Ma			48		FAA	0.901768	0.682235	#DIV/0!	0.867152	124.469	34.8508	0	0	0	128.302	49.0425	248.619	0	108.809	0	43.151	56.1409	32.3458	825.729	15.0738	4.22061	0	0	0	15.538	5.9393	30.109	0	13.1773	0	5.22581	6.79895	3.91724
21282	ArEw16bF	16660bF	Easton Wood	UK	52° 21.43' N	1° 41.52' E	Early Pleistocene 2.35-2.25 Ma			48		FAA	0.890665	0.658711	#DIV/0!	0.88221	155.083	43.1243	0	45.8636	0	346.679	108.357	522.969	80.1561	239.416	0	78.9458	143.027	70.1696	1833.79	8.45694	2.35165	0	2.50103	0	18.9051	5.9089	28.5185	4.37106	13.0558	0	4.30506	7.79954	3.82648
21282	ArEw17bF	16661bF	Easton Wood	UK	52° 21.43' N	1° 41.52' E	Early Pleistocene 2.35-2.25 Ma			48		FAA	0.896093	0.632896	#DIV/0!	0.840842	142.399	40.3312	0	34.1395	0	227.218	89.5601	371.26	28.634	181.027	0	59.6447	102.686	50.9239	1327.82	10.7242	3.0374	0	2.57109	0	17.1121	6.74489	27.96	2.15646	13.6334	0	4.49192	7.73339	3.83514
21282	ArEw18bF	16662bF	Easton Wood	UK	52° 21.43' N	1° 41.52' E	Early Pleistocene 2.35-2.25 Ma			48		FAA	0.905256	0.587821	#DIV/0!	0.877086	78.7267	21.3146	0	37.4346	0	259.097	83.9659	438.785	71.2453	214.43	0	68.6087	117.272	54.515	1445.39	5.44673	1.47466	0	2.58992	0	17.9257	5.8092	30.3575	4.92913	14.8354	0	4.74671	8.11349	3.77163
21282	ArEw19bF	16663bF	Easton Wood	UK	52° 21.43' N	1° 41.52' E	Early Pleistocene 2.35-2.25 Ma			48		FAA	0.909483	0.615699	#DIV/0!	0.874154	153.599	41.5818	0	46.4492	0	346.883	77.3218	512.831	83.974	236.041	0	77.667	141.81	64.6394	1782.8	8.61564	2.33239	0	2.60541	0	19.4572	4.3371	28.7655	4.71024	13.2399	0	4.35647	7.95436	3.62573
21282	ArEw20bF	16664bF	Easton Wood	UK	52° 21.43' N	1° 41.52' E	Early Pleistocene 2.35-2.25 Ma			48		FAA	0.927583	0.642347	#DIV/0!	0.862544	94.6732	28.2149	0	30.1955	0	229.069	50.1084	373.659	47.1118	178.951	0	55.2833	93.2671	42.251	1222.78	7.74243	2.30743	0	2.4694	0	18.7334	4.09789	30.5581	3.85283	14.6347	0	4.5211	7.62743	3.45531
21282	ArEw21bF	16665bF	Easton Wood	UK	52° 21.43' N	1° 41.52' E	Early Pleistocene 2.35-2.25 Ma			48		FAA	0.845714	0.67227	#DIV/0!	0.881984	51.9679	16.7258	0	37.3252	0	250.794	92.8672	399.404	21.9605	192.582	0	64.5724	110.066	52.4089	1290.67	4.02642	1.2959	0	2.89192	0	19.4312	7.19525	30.9454	1.70147	14.921	0	5.003	8.52776	4.06058
21282	ArEw22bF	16666bF	Easton Wood	UK	52° 21.43' N	1° 41.52' E	Early Pleistocene 2.35-2.25 Ma			48		FAA	0.919302	0.688113	#DIV/0!	0.881146	347.603	86.5368	0	49.8935	0	311.443	123.502	547.184	94.259	252.325	0	83.4117	122.398	54.8337	2073.39	16.765	4.17369	0	2.40637	0	15.021	5.95651	26.3908	4.54613	12.1697	0	4.02296	5.90326	2.64464
21282	ArEw23bF	16667bF	Easton Wood	UK	52° 21.43' N	1° 41.52' E	Early Pleistocene 2.35-2.25 Ma			48		FAA	0.862839	0.591096	#DIV/0!	0.839227	59.6043	19.2704	0	24.6447	0	152.394	68.153	286.958	0	131.566	0	46.8212	63.5238	33.7457	886.681	6.72218	2.17332	0	2.77943	0	17.187	7.68631	32.3632	0	14.838	0	5.2805	7.16423	3.80585
21282	ArEw24bF	16668bF	Easton Wood	UK	52° 21.43' N	1° 41.52' E	Early Pleistocene 2.35-2.25 Ma			48		FAA	0.890332	0.693393	#DIV/0!	0.824478	53.7516	22.0536	0	0	0	155.01	37.9435	277.932	0	111.401	0	43.2605	59.4019	37.0644	797.818	6.73733	2.76424	0	0	0	19.4292	4.75591	34.8366	0	13.9632	0	5.42235	7.44555	4.64571
21280	ArCg1bF	16236bF	Capel Green Pit	UK	52° 4.41' N	1° 27.5' E	Late Pliocene / Early Pleistocene 3.6-2.12 Ma			48		FAA	0.961011	0.605523	#DIV/0!	0.970983	165.299	54.1841	0	0	0	113.201	0	277.819	6.48265	101.233	0	33.2506	51.9138	32.2934	835.676	19.7803	6.48386	0	0	0	13.546	0	33.2448	0.775738	12.1139	0	3.97889	6.2122	3.86434
21280	ArCg2bF	16237bF	Capel Green Pit	UK	52° 4.41' N	1° 27.5' E	Late Pliocene / Early Pleistocene 3.6-2.12 Ma			48		FAA	0.964617	0.649187	#DIV/0!	0.958501	191.219	54.2628	0	0	0	125.227	0	257.89	0	115.93	0	33.3629	54.5243	34.392	866.807	22.0601	6.26008	0	0	0	14.4469	0	29.7517	0	13.3743	0	3.84895	6.29025	3.96767
21280	ArCg3bF	16238bF	Capel Green Pit	UK	52° 4.41' N	1° 27.5' E	Late Pliocene / Early Pleistocene 3.6-2.12 Ma			48		FAA	0.982853	0.732385	#DIV/0!	0.94387	189.45	64.3025	0	0	0	147.773	7.75411	267.653	5.38919	119.15	0	38.0579	62.965	39.1746	941.669	20.1185	6.82856	0	0	0	15.6927	0.823443	28.4232	0.572302	12.6531	0	4.04154	6.68654	4.16012
21281	ArAh1bF	16239bF	Alderton House pit	UK	52° 1.2' N	1° 23.24' E	Late Pliocene / Early Pleistocene 3.6-2.12 Ma			48		FAA	0.985688	0.633623	#DIV/0!	0.962585	158.962	39.455	0	0	0	92.6766	114.494	147.583	3.45873	92.5662	0	24.148	38.3835	28.1611	739.888	21.4846	5.33256	0	0	0	12.5258	15.4745	19.9467	0.467466	12.5108	0	3.26373	5.18775	3.80613
21281	ArAh2bF	16240bF	Alderton House pit	UK	52° 1.2' N	1° 23.24' E	Late Pliocene / Early Pleistocene 3.6-2.12 Ma			48		FAA	1.05977	0.641878	#DIV/0!	0.980944	45.7076	17.1376	0	0	0	43.1645	33.7524	114.866	4.96032	52.006	0	17.3978	23.6719	20.7386	373.402	12.2408	4.58958	0	0	0	11.5598	9.03914	30.7619	1.32841	13.9276	0	4.65927	6.3395	5.55396
21281	ArAh3bF	16241bF	Alderton House pit	UK	52° 1.2' N	1° 23.24' E	Late Pliocene / Early Pleistocene 3.6-2.12 Ma			48		FAA	0.974112	0.771124	#DIV/0!	0.971262	227.358	53.1555	0	0	0	124.818	58.6037	285.294	5.87255	144.48	0	32.584	57.4499	37.29	1026.9	22.1401	5.17629	0	0	0	12.1547	5.70683	27.7819	0.57187	14.0695	0	3.17303	5.59447	3.6313
21281	ArAh4bF	16242bF	Alderton House pit	UK	52° 1.2' N	1° 23.24' E	Late Pliocene / Early Pleistocene 3.6-2.12 Ma			48		FAA	0.968048	0.689968	#DIV/0!	0.939042	282.327	75.3463	0	0	0	174.801	8.27747	326.036	9.1135	177.083	0	50.6546	94.6413	50.7981	1249.08	22.6028	6.03215	0	0	0	13.9944	0.662686	26.1021	0.729617	14.1771	0	4.05536	7.57688	4.06684
21281	ArAh5bF	16243bF	Alderton House pit	UK	52° 1.2' N	1° 23.24' E	Late Pliocene / Early Pleistocene 3.6-2.12 Ma			48		FAA	0.991308	0.565964	#DIV/0!	0.937928	73.3667	25.9235	0	0	0	46.1595	35.0258	150.136	6.21417	64.5322	0	20.704	29.4433	23.0072	474.512	15.4615	5.46318	0	0	0	9.72779	7.38144	31.64	1.30959	13.5997	0	4.36321	6.20496	4.8486
21281	ArAh6bF	16244bF	Alderton House pit	UK	52° 1.2' N	1° 23.24' E	Late Pliocene / Early Pleistocene 3.6-2.12 Ma			48		FAA	0.988674	0.747527	#DIV/0!	0.948172	171.973	52.6054	0	6.85309	0	144.059	63.6841	302.059	5.47744	152.793	0	60.6385	86.8255	48.5715	1095.54	15.6975	4.80178	0	0.625545	0	13.1496	5.81303	27.5717	0.499977	13.9469	0	5.53504	7.92536	4.43357
20798	ArPeL1iOSL1b48	14827bH*	North Sea	UK	58॰ 37’ N	1॰ 27’ E	modern		iOSL	48		THAA	0.133768	0.0683684	0.154919	0.216651	364.97	265.47	169.984	131.091	92.4213	4631.12	1182.24	282.78	580.094	236.292	0	92.2972	95.3972	30.1767	8154.33	4.47578	3.25557	2.08458	1.60762	1.1334	56.7933	14.4983	3.46785	7.11393	2.89774	0	1.13188	1.1699	0.370069
20798	ArPeL1iOSL2b48	14828bH*	North Sea	UK	58॰ 37’ N	1॰ 27’ E	modern		iOSL	48		THAA	0.145062	0.0754374	0.254822	0.198241	266.876	191.853	97.2309	104.286	9.37542	145.381	162.547	213.465	8.2062	153.288	0	57.1844	68.2302	26.5433	1504.47	17.7389	12.7522	6.46282	6.93173	0.623173	9.6633	10.8043	14.1888	0.545456	10.1889	0	3.80097	4.53518	1.7643
20798	ArPeL1iOSL3b48	14829bH*	North Sea	UK	58॰ 37’ N	1॰ 27’ E	modern		iOSL	48		THAA	0.140284	0.067574	0.262988	0.170623	160.179	97.8565	64.0756	57.9472	5.56424	86.3192	98.727	126.46	18.6086	77.2446	0	31.3155	39.2471	22.9229	886.467	18.0694	11.0389	7.2282	6.53687	0.627688	9.73745	11.1371	14.2656	2.09918	8.71376	0	3.53262	4.42736	2.58587
20690	ArBriOSL1b48H*	15035bH*	North Sea	UK	58॰ 37’ N	1॰ 27’ E	modern		iOSL	48		THAA	0.159578	0.0735095	0.275434	0	295.766	208.086	107.812	121.912	30.3035	234.346	113.894	234.15	14.7353	126.291	59.2268	59.2454	84.0308	7.67929	1697.48	17.4238	12.2585	6.35131	7.18192	1.78521	13.8056	6.70959	13.794	0.86807	7.43995	3.4891	3.4902	4.95033	0.452394
20690	ArBriOSL2b48H*	15036bH*	North Sea	UK	58॰ 37’ N	1॰ 27’ E	modern		iOSL	48		THAA	0.159884	0.0722123	0.279832	0	363.388	230.776	133.3	159.444	61.2603	211.786	210.472	277.712	63.7205	168.033	43.8862	77.0042	111.543	8.19572	2120.52	17.1367	10.883	6.28621	7.51909	2.88892	9.98747	9.9255	13.0964	3.00494	7.92414	2.06959	3.63138	5.26018	0.386496
20890	ArNsM1A1bH*	15278bH*	North Sea	UK	58॰ 37’ N	1॰ 27’ E	modern		iOSL	48	early	THAA	0.136981	0.060573	0.275639	0.154387	166.756	96.1773	87.8962	112.767	0	171.401	141.945	198.093	25.1413	127.768	0	52.5957	62.802	19.9476	1263.29	13.2001	7.61324	6.95772	8.92649	0	13.5678	11.2362	15.6807	1.99015	10.1139	0	4.16339	4.97131	1.57902
20890	ArNsM1A1bH*	15278bH*	North Sea	UK	58॰ 37’ N	1॰ 27’ E	modern		iOSL	48	early	THAA	0.135285	0.0687311	0.262437	0.118175	158.208	75.8363	88.8573	117.163	29.0559	141.79	137.983	201.996	4.28806	132.446	0	53.8226	63.3167	20.5213	1225.28	12.912	6.18928	7.25197	9.56213	2.37136	11.572	11.2613	16.4856	0.349964	10.8094	0	4.39266	5.16751	1.67482
20890	ArNsM1A2bH*	15279bH*	North Sea	UK	58॰ 37’ N	1॰ 27’ E	modern		iOSL	48	late	THAA	0.112115	0.0544678	0.222306	0.106898	190.543	119.828	193.343	283.565	64.0402	335.809	312.233	234.84	30.7734	259.897	0	123.766	139.456	34.5231	2322.62	8.2038	5.15919	8.32434	12.2089	2.75724	14.4582	13.4431	10.111	1.32495	11.1898	0	5.32873	6.00428	1.48639
20890	ArNsM1A2bH*	15279bH*	North Sea	UK	58॰ 37’ N	1॰ 27’ E	modern		iOSL	48	late	THAA	0.109941	0.0557759	0.217359	0.110024	214.497	133.382	207.69	314.654	31.2916	274.171	355.33	247.71	20.242	285.541	0	128.864	146.259	10.6766	2370.31	9.04932	5.6272	8.76215	13.2748	1.32015	11.5669	14.9909	10.4505	0.853983	12.0466	0	5.43661	6.17048	0.450431
20888	ArNsM2C1bH*	15280bH*	North Sea	UK	58॰ 37’ N	1॰ 27’ E	modern		iOSL	48	early	THAA	0.132321	0.0631885	0.272135	0.137351	194.832	135.54	80.3739	100.456	0	158.77	125.105	197.674	0	111.601	0	44.2213	57.7736	17.0098	1223.36	15.9261	11.0793	6.56996	8.21148	0	12.9782	10.2264	16.1583	0	9.12255	0	3.61475	4.72255	1.39042
20888	ArNsM2C1bH*	15280bH*	North Sea	UK	58॰ 37’ N	1॰ 27’ E	modern		iOSL	48	early	THAA	0.134735	0.0680749	0.260439	0	205.501	119.416	85.8549	111.671	5.25814	121.587	124.688	212.705	2.49045	111.067	0	45.9059	62.5003	11.3276	1219.97	16.8447	9.78839	7.03745	9.1536	0.431005	9.96635	10.2206	17.4353	0.20414	9.10409	0	3.76287	5.12309	0.92851
20888	ArNsM2C2bH*	15281bH*	North Sea	UK	58॰ 37’ N	1॰ 27’ E	modern		iOSL	48	late	THAA	0.13374	0.0713385	0.24499	0.102373	479.796	323.508	201.087	264.195	64.4597	353.739	255.658	253.475	13.2259	250.197	0	113.024	128.226	31.4004	2731.99	17.5621	11.8415	7.36045	9.67043	2.35944	12.948	9.35795	9.27802	0.484111	9.15804	0	4.13707	4.69351	1.14936
20888	ArNsM2C2bH*	15281bH*	North Sea	UK	58॰ 37’ N	1॰ 27’ E	modern		iOSL	48	late	THAA	0.134492	0.0724332	0.246573	0.0915525	500.816	286.462	215.711	293.949	0	263.418	265.785	273.09	223.933	47.4613	0	115.928	136.886	11.0806	2634.52	19.0098	10.8734	8.18787	11.1576	0	9.9987	10.0886	10.3658	8.49996	1.80152	0	4.40033	5.19586	0.420594
20889	ArNsM3A1bH*	15282bH*	North Sea	UK	58॰ 37’ N	1॰ 27’ E	modern		iOSL	48	early	THAA	0.127747	0.0605397	0.253742	0.0935079	434.439	290.417	173.339	242.029	66.2121	328.847	219.203	303.743	74.4877	254.321	10.6817	89.2754	94.2091	20.6836	2601.89	16.6971	11.1618	6.66205	9.30207	2.54477	12.6388	8.42476	11.674	2.86283	9.77449	0.410535	3.43118	3.62079	0.794946
20889	ArNsM3A1bH*	15282bH*	North Sea	UK	58॰ 37’ N	1॰ 27’ E	modern		iOSL	48	early	THAA	0.129162	0.0628876	0.255381	0.113722	417.481	254.605	185.027	237.128	46.0291	141.144	213.677	315.711	77.4682	234.24	3.92247	91.8715	100.684	4.24384	2323.23	17.9698	10.9591	7.9642	10.2068	1.98125	6.07531	9.19742	13.5893	3.3345	10.0825	0.168837	3.95447	4.33379	0.18267
20889	ArNsM3A2bH*	15283bH*	North Sea	UK	58॰ 37’ N	1॰ 27’ E	modern		iOSL	48	late	THAA	0.153612	0.0911755	0.254536	0.169491	330.744	218.947	129.864	156.913	57.2557	337.743	157.466	188.919	45.3173	186.153	4.62972	69.9744	80.1996	20.2605	1984.39	16.6673	11.0335	6.54431	7.90738	2.88531	17.02	7.93525	9.52027	2.28369	9.38086	0.233307	3.52625	4.04153	1.021
20889	ArNsM3A2bH*	15283bH*	North Sea	UK	58॰ 37’ N	1॰ 27’ E	modern		iOSL	48	late	THAA	0.156892	0.094781	0.254902	0.145448	336.02	187.77	134.659	165.113	25.8073	260.875	161.213	202.156	46.2372	196.759	3.21445	73.0216	84.0744	10.7392	1887.66	17.8009	9.94724	7.13367	8.74697	1.36716	13.82	8.54035	10.7093	2.44945	10.4234	0.170288	3.86837	4.4539	0.568915
20891	ArIcP1A1bH*	15274bH*	North Icelandic Shelf	Iceland	66° 31.59’ N	18° 11.74’ W	Post-medieval		iOSL	48	early	THAA	0.163318	0.0768801	0.32207	0.108251	259.843	184.067	82.6696	99.6405	0	171.241	105.964	191.268	9.62481	120.559	14.7162	44.8056	55.4051	15.0337	1354.84	19.1789	13.5859	6.1018	7.35442	0	12.6392	7.82118	14.1174	0.710403	8.89843	1.0862	3.30708	4.08943	1.10963
20891	ArIcP1A1bH*	15274bH*	North Icelandic Shelf	Iceland	66° 31.59’ N	18° 11.74’ W	Post-medieval		iOSL	48	early	THAA	0.165223	0.0807299	0.316314	0.137266	263.871	181.509	85.2943	111.922	3.08474	158.63	113.948	194.491	10.2278	130.58	21.2689	49.4192	56.9405	15.8286	1397.01	18.8882	12.9926	6.10547	8.01153	0.220809	11.3549	8.15654	13.9219	0.73212	9.34705	1.52245	3.53749	4.07587	1.13303
20891	ArIcP1A2bH*	15275bH*	North Icelandic Shelf	Iceland	66° 31.59’ N	18° 11.74’ W	Post-medieval		iOSL	48	late	THAA	0.191458	0.126801	0.321024	0.127528	365.178	275.38	117.041	155.296	39.5457	331.749	200.159	195.956	39.2947	179.887	0	77.2657	83.6542	30.1937	2090.6	17.4676	13.1723	5.59843	7.42828	1.8916	15.8686	9.57423	9.37321	1.87959	8.60455	0	3.69586	4.00144	1.44426
20891	ArIcP1A2bH*	15275bH*	North Icelandic Shelf	Iceland	66° 31.59’ N	18° 11.74’ W	Post-medieval		iOSL	48	late	THAA	0.200898	0.129055	0.315875	0.146413	369.865	265.032	115.867	162.504	41.7664	248.389	218.262	194.746	43.2422	190.014	0	82.4953	84.6524	10.2122	2027.05	18.2465	13.0748	5.71604	8.01677	2.06045	12.2537	10.7675	9.60739	2.13326	9.37391	0	4.06973	4.17614	0.503796
20892	ArIcP2B1bH*	15276bH*	North Icelandic Shelf	Iceland	66° 31.59’ N	18° 11.74’ W	Post-medieval		iOSL	48	early	THAA	0.144278	0.0737139	0.277813	0.106446	337.514	244.491	110.57	152.851	26.5609	212.68	164.517	224.609	10.9109	168.695	0	60.5063	64.8046	22.7901	1801.5	18.7352	13.5715	6.13768	8.48467	1.47438	11.8057	9.1322	12.4679	0.605658	9.36413	0	3.35866	3.59726	1.26506
20892	ArIcP2B1bH*	15276bH*	North Icelandic Shelf	Iceland	66° 31.59’ N	18° 11.74’ W	Post-medieval		iOSL	48	early	THAA	0.150621	0.0744184	0.271244	0.133009	334.198	229.993	109.59	157.062	35.1839	139.977	162.29	223.153	12.3036	170.428	0	61.2343	64.7877	5.52717	1705.73	19.5927	13.4836	6.4248	9.20792	2.06269	8.20629	9.51442	13.0825	0.721313	9.99153	0	3.58992	3.79825	0.324036
20892	ArIcP2B2bH*	15277bH*	North Icelandic Shelf	Iceland	66° 31.59’ N	18° 11.74’ W	Post-medieval		iOSL	48	late	THAA	0.148709	0.075067	0.28745	0.0910444	628.559	440.058	221.477	279.026	82.8677	413.709	255.652	323.453	66.524	311.406	32.7196	124.48	130.48	25.4441	3335.86	18.8425	13.1918	6.63928	8.36445	2.48415	12.4019	7.66376	9.69624	1.99421	9.3351	0.980846	3.73159	3.91143	0.762745
20892	ArIcP2B2bH*	15277bH*	North Icelandic Shelf	Iceland	66° 31.59’ N	18° 11.74’ W	Post-medieval		iOSL	48	late	THAA	0.1539	0.075558	0.288518	0.0407531	619.493	391.145	218.735	280.983	53.1674	293.927	249.669	325.445	65.3526	300.403	23.7367	120.462	135.701	9.65766	3087.88	20.0621	12.6671	7.08367	9.09956	1.72181	9.51875	8.08545	10.5394	2.11643	9.72847	0.768707	3.90111	4.39462	0.312761
21269	ArNIS061746bH*	16215bH*	North Icelandic Shelf	Iceland	66° 31.59’ N	18° 11.74’ W	Late Holocene		iOSL	48		THAA	0.172758	0.0394655	0.280657	0	342.662	274.467	155.726	150.546	10.4457	268.783	151.582	182.598	0	135.529	0	20.2932	99.2803	9.83689	1801.75	19.0183	15.2334	8.64307	8.35552	0.579755	14.9179	8.41307	10.1345	0	7.52209	0	1.1263	5.51022	0.545963
21270	ArNIS061305bH*	16216bH*	North Icelandic Shelf	Iceland	66° 31.59’ N	18° 11.74’ W	Late Holocene		iOSL	48		THAA	0.221833	0.0499055	0.401432	0	1859.5	1265.75	691.778	723.844	84.1285	1365.67	1100.43	1001.85	23.9193	131.638	54.6833	315.168	352.629	50.0267	9021.01	20.613	14.0311	7.66852	8.02398	0.932584	15.1387	12.1985	11.1058	0.265151	1.45923	0.606177	3.49371	3.90897	0.554557
21271	ArNIS061617bH*	16217bH*	North Icelandic Shelf	Iceland	66° 31.59’ N	18° 11.74’ W	Late Holocene		iOSL	48		THAA	0.186089	0.052184	0.390295	0.0965425	566.94	371.876	217.135	212.388	23.5999	370.203	199.821	361.169	41.0863	233.168	69.221	92.8122	110.802	7.9058	2878.13	19.6982	12.9208	7.54432	7.37938	0.819973	12.8626	6.94274	12.5487	1.42754	8.10137	2.40507	3.22474	3.84981	0.274686
21272	ArNIS061407bH*	16218bH*	North Icelandic Shelf	Iceland	66° 31.59’ N	18° 11.74’ W	Late Holocene		iOSL	48		THAA	0.196293	0.0450868	0.377454	0	213.765	148.518	82.6635	81.6021	11.7402	185.543	68.1671	149.727	12.592	74.6496	0	32.707	45.9487	9.41361	1117.04	19.1368	13.2957	7.40024	7.30523	1.05101	16.6103	6.10249	13.4039	1.12727	6.68282	0	2.92801	4.11345	0.84273
21273	ArNIS061711bH*	16219bH*	North Icelandic Shelf	Iceland	66° 31.59’ N	18° 11.74’ W	Late Holocene		iOSL	48		THAA	0.184651	0.0511992	0.336999	0	245.173	165.376	103.592	100.985	10.2091	181.609	103.296	190.203	8.28497	89.6673	0	35.3076	60.817	9.3306	1303.85	18.8037	12.6837	7.94505	7.74514	0.782998	13.9287	7.92238	14.5878	0.635423	6.87711	0	2.70795	4.66441	0.715619
20886	ArNsP1A1bH*	15268bH*	Fladen Ground	UK	58.831° N	−0.356° E	Mid-Holocene		iOSL	48	early	THAA	0.30338	0.094178	0.46929	0.11871	375.062	292.256	113.114	156.094	40.6666	235.095	179.204	214.943	102.32	185.047	0	65.6867	67.9342	25.8929	2053.32	18.2662	14.2334	5.50884	7.60206	1.98053	11.4495	8.72755	10.4681	4.98317	9.01212	0	3.19905	3.30851	1.26103
20886	ArNsP1A1bH*	15268bH*	Fladen Ground	UK	58.831° N	−0.356° E	Mid-Holocene		iOSL	48	early	THAA	0.306356	0.0928035	0.432171	0.0761894	372.781	273.104	114.365	166.711	53.3313	226.178	192.816	250.318	104.96	191.713	0	70.4746	69.278	31.4346	2117.47	17.605	12.8977	5.40105	7.87314	2.51864	10.6816	9.10597	11.8216	4.95688	9.05388	0	3.32825	3.27174	1.48454
20886	ArNsP1A2bH*	15269bH*	Fladen Ground	UK	58.831° N	−0.356° E	Mid-Holocene		iOSL	48	late	THAA	0.317591	0.105111	0.4758	0.106294	160.734	116.771	87.6698	92.134	25.0774	199.925	96.0296	151.41	3.32114	111.446	0	44.2504	47.5131	15.3882	1151.67	13.9566	10.1393	7.61241	8.00004	2.17748	17.3596	8.3383	13.147	0.288377	9.67689	0	3.84228	4.12558	1.33617
20886	ArNsP1A2bH*	15269bH*	Fladen Ground	UK	58.831° N	−0.356° E	Mid-Holocene		iOSL	48	late	THAA	0.325534	0.107217	0.435013	0.0338313	163.39	92.9631	84.251	99.4137	31.4759	101.8	83.5232	169.077	4.00609	122.519	0	45.9009	50.2433	16.7159	1065.28	15.3377	8.72664	7.90881	9.33217	2.95471	9.5562	7.8405	15.8716	0.37606	11.5011	0	4.30881	4.71644	1.56916
20885	ArNsP2A1bH*	15270bH*	Fladen Ground	UK	58.831° N	−0.356° E	Mid-Holocene		iOSL	48	early	THAA	0.308322	0.0900606	0.478838	0.0979635	540.173	422.404	171.639	235.072	79.6377	321.589	270.475	366.246	153.55	285.689	0	108.325	98.2454	40.5468	3093.59	17.461	13.6542	5.5482	7.59869	2.57428	10.3953	8.74309	11.8388	4.9635	9.23487	0	3.50158	3.17577	1.31067
20885	ArNsP2A1bH*	15270bH*	Fladen Ground	UK	58.831° N	−0.356° E	Mid-Holocene		iOSL	48	early	THAA	0.310465	0.0902373	0.463645	0.0924965	575.705	439.119	179.235	258.225	31.7959	291.049	303.139	382.266	163.074	307.58	0	114.301	103.256	48.6904	3197.43	18.0052	13.7335	5.6056	8.07599	0.994418	9.10257	9.4807	11.9554	5.10016	9.61958	0	3.57477	3.22933	1.5228
20885	ArNsP2A2bH*	15271bH*	Fladen Ground	UK	58.831° N	−0.356° E	Mid-Holocene		iOSL	48	late	THAA	0.325552	0.115339	0.514807	0.128061	217.448	161.447	68.9337	82.1086	14.9526	138.395	98.3386	152.465	5.35283	105.883	0	39.8716	42.1766	22.3128	1149.68	18.9137	14.0427	5.99588	7.14183	1.30059	12.0376	8.55353	13.2614	0.465591	9.20978	0	3.46804	3.66853	1.94078
20885	ArNsP2A2bH*	15271bH*	Fladen Ground	UK	58.831° N	−0.356° E	Mid-Holocene		iOSL	48	late	THAA	0.32754	0.120083	0.478976	0.148566	228.119	162.678	69.7134	80.6647	18.6039	104.476	116.754	153.655	8.79747	119.759	0	44.7517	45.0501	28.2996	1181.32	19.3105	13.7708	5.90131	6.82835	1.57484	8.84401	9.88331	13.0071	0.744715	10.1377	0	3.78827	3.81354	2.39559
20887	ArNsP3A1bH*	15272bH*	Fladen Ground	UK	58.831° N	−0.356° E	Mid-Holocene		iOSL	48	early	THAA	0.295184	0.0949304	0.452876	0.104654	308.208	226.617	109.872	128.18	15.905	215.411	194.748	288.869	4.40897	171.735	0	67.5614	73.0538	29.6841	1834.25	16.8029	12.3547	5.98999	6.98811	0.867109	11.7438	10.6173	15.7486	0.240369	9.36267	0	3.68332	3.98276	1.61832
20887	ArNsP3A1bH*	15272bH*	Fladen Ground	UK	58.831° N	−0.356° E	Mid-Holocene		iOSL	48	early	THAA	0.299474	0.0986308	0.438639	0.13283	317.594	216.199	109.789	144.587	7.32797	159.11	213.295	291.754	6.75202	187.811	0	73.7953	75.825	36.3678	1840.21	17.2586	11.7486	5.96614	7.85712	0.398214	8.64629	11.5908	15.8544	0.366916	10.206	0	4.01016	4.12046	1.97629
20887	ArNsP3A2bH*	15273bH*	Fladen Ground	UK	58.831° N	−0.356° E	Mid-Holocene		iOSL	48	late	THAA	0.333533	0.117074	0.547746	0.137344	306.706	216.645	85.4936	104.38	0	178.603	135.165	192.555	2.4964	138.363	0	53.7198	55.1344	26.1559	1495.42	20.5097	14.4873	5.71703	6.98	0	11.9433	9.03861	12.8763	0.166936	9.25249	0	3.59229	3.68688	1.74907
20887	ArNsP3A2bH*	15273bH*	Fladen Ground	UK	58.831° N	−0.356° E	Mid-Holocene		iOSL	48	late	THAA	0.335435	0.12288	0.499061	0.156688	319.423	216.757	87.0502	111.73	3.28182	120.922	158.179	193.236	7.75842	155.478	21.347	59.6478	59.0654	34.2733	1548.15	20.6326	14.001	5.62285	7.217	0.211983	7.81076	10.2173	12.4817	0.501142	10.0428	1.37887	3.85285	3.81523	2.21383
20965	ArNs0658bH*	15641bH*	Fladen Ground	UK	58° 50’ N	0° 21.35’ W	Mid-Holocene		iOSL	48		THAA	0.315535	0.106508	0.444375	0.183102	495.844	382.483	166.508	173.789	20.1761	283.985	220.006	329.939	0	236.357	0	100.688	130.603	31.8358	2572.22	19.2769	14.8698	6.47332	6.75641	0.784385	11.0405	8.55318	12.827	0	9.18885	0	3.91446	5.07747	1.23768
20965	ArNs0658bH*	15641bH*	Fladen Ground	UK	58° 50’ N	0° 21.35’ W	Mid-Holocene		iOSL	48		THAA	0.315678	0.107113	0.435198	0.176066	491.797	378.213	166.029	177.28	18.5697	274.337	229.582	324.99	2.0309	232.235	0	100.37	131.385	34.9615	2561.78	19.1975	14.7637	6.48102	6.92018	0.724875	10.7088	8.96182	12.6861	0.079277	9.06539	0	3.91799	5.12865	1.36473
20966	ArNs0684bH*	15643bH*	Fladen Ground	UK	58.831° N	−0.356° E	Mid-Holocene		iOSL	48		THAA	0.321056	0.104635	0.479242	0.193615	768.278	618.335	275.041	313.487	30.477	400.818	372.269	556.671	4.92977	404.925	0	164.865	200.576	51.8695	4162.54	18.4569	14.8547	6.60753	7.53116	0.732173	9.62918	8.94331	13.3733	0.118432	9.72784	0	3.96067	4.81859	1.2461
20966	ArNs0684bH*	15643bH*	Fladen Ground	UK	58.831° N	−0.356° E	Mid-Holocene		iOSL	48		THAA	0.321723	0.105024	0.481284	0.189276	760.598	611.735	273.68	306.617	27.0687	420.527	358.711	557.994	5.24675	400.506	0	164.482	1392.79	47.9946	5327.95	14.2756	11.4816	5.13669	5.75488	0.508052	7.89286	6.73263	10.473	0.0984761	7.51709	0	3.08715	26.1411	0.900808
1787	ArWeyiOSL1b48H*	15052bH*	Weybourne Crag	UK	52° 56.55’ N	1° 08.33’ E	Early Pleistocene 2.2-2.1 Ma		iOSL	48		THAA	0.692911	0.509514	0.18298	0.55166	195.135	211.845	36.413	316.629	23.8714	279.532	220.649	467.599	13.6708	277.217	45.0277	116.381	116.914	8.53246	2329.42	8.37698	9.09435	1.56318	13.5926	1.02478	12.0001	9.47229	20.0736	0.586877	11.9007	1.933	4.99616	5.01901	0.366292
1787	ArWeyiOSL2b48H*	15081bH*	Weybourne Crag	UK	52° 56.55’ N	1° 08.33’ E	Early Pleistocene 2.2-2.1 Ma		iOSL	48		THAA	0.690637	0.490835	0.136602	0.561241	238.987	236.294	29.6275	94.8002	0	153.84	138.776	297.257	8.44687	175.72	46.8895	73.6968	60.3773	8.51265	1563.22	15.2881	15.1158	1.89528	6.0644	0	9.84117	8.87753	19.0156	0.540349	11.2409	2.99954	4.71441	3.86235	0.544557
21282	ArEw1bH*	16645bH*	Easton Wood	UK	52° 21.43' N	1° 41.52' E	Early Pleistocene 2.35-2.25 Ma			48		THAA	0.713346	0.509654	#DIV/0!	0.544069	203.162	99.3839	0	3.35491	0	168.493	33.5125	173.218	0	87.0804	0	23.2675	51.5773	25.9971	869.046	23.3776	11.436	0	0.386045	0	19.3882	3.85624	19.932	0	10.0202	0	2.67736	5.93493	2.99145
21282	ArEw2bH*	16646bH*	Easton Wood	UK	52° 21.43' N	1° 41.52' E	Early Pleistocene 2.35-2.25 Ma			48		THAA	0.810437	0.616611	0	0.738962	156.258	132.072	9.22802	39.5517	0	202.632	77.6039	355.697	49.2528	192.376	0	70.6809	88.724	50.1122	1424.19	10.9717	9.27348	0.647949	2.77714	0	14.2279	5.44899	24.9754	3.45831	13.5078	0	4.96289	6.22979	3.51865
21282	ArEw3bH*	16647bH*	Easton Wood	UK	52° 21.43' N	1° 41.52' E	Early Pleistocene 2.35-2.25 Ma			48		THAA	0.823072	0.618678	0	0.729729	377	325.896	10.0061	73.3244	0	325.89	115.809	586.213	17.4594	340.534	0	117.038	148.879	77.5006	2515.55	14.9868	12.9553	0.397771	2.91485	0	12.955	4.60373	23.3036	0.694059	13.5372	0	4.65257	5.91835	3.08086
21282	ArEw4bH*	16648bH*	Easton Wood	UK	52° 21.43' N	1° 41.52' E	Early Pleistocene 2.35-2.25 Ma			48		THAA	0.793543	0.594388	0	0.74072	135.248	112.792	7.55822	25.0067	0	172.023	49.4468	284.656	5.87683	136.184	0	46.2717	59.7804	38.5092	1073.35	12.6005	10.5084	0.70417	2.32978	0	16.0267	4.60676	26.5202	0.547521	12.6877	0	4.31095	5.56951	3.58775
21282	ArEw5bH*	16649bH*	Easton Wood	UK	52° 21.43' N	1° 41.52' E	Early Pleistocene 2.35-2.25 Ma			48		THAA	0.799896	0.615055	0	0.757499	94.1405	111.001	8.29474	22.3088	0	158.801	39.8751	274.137	9.08633	125.687	0	42.7041	58.5752	37.7857	982.396	9.58274	11.299	0.844337	2.27086	0	16.1647	4.05896	27.9049	0.924915	12.794	0	4.34693	5.96248	3.84627
21282	ArEw6bH*	16650bH*	Easton Wood	UK	52° 21.43' N	1° 41.52' E	Early Pleistocene 2.35-2.25 Ma			48		THAA	0.749015	0.590991	0	0.750349	135.335	108.635	19.172	50.7742	0	303.938	102.324	558.103	13.4895	298.566	0	97.1103	123.57	64.913	1875.93	7.2143	5.79098	1.022	2.70662	0	16.202	5.45457	29.7508	0.719084	15.9156	0	5.17665	6.58713	3.46031
21282	ArEw7bH*	16651bH*	Easton Wood	UK	52° 21.43' N	1° 41.52' E	Early Pleistocene 2.35-2.25 Ma			48		THAA	0.819713	0.628953	0	0.756181	1086.29	985.028	25.9959	59.8496	0	880.49	236.313	1631.52	0	710.206	0	325.067	429.082	161.248	6531.09	16.6326	15.0821	0.398032	0.916379	0	13.4815	3.61827	24.9808	0	10.8742	0	4.97722	6.56984	2.46894
21282	ArEw8bH*	16652bH*	Easton Wood	UK	52° 21.43' N	1° 41.52' E	Early Pleistocene 2.35-2.25 Ma			48		THAA	0.804669	0.632411	0	0.774902	150.917	131.824	10.5385	23.3989	0	438.82	130.53	661.634	0	346.354	0	104.208	211.971	99.1284	2309.32	6.5351	5.70835	0.456348	1.01324	0	19.0021	5.6523	28.6505	0	14.9981	0	4.51249	9.17893	4.29253
21282	ArEw9bH*	16653bH*	Easton Wood	UK	52° 21.43' N	1° 41.52' E	Early Pleistocene 2.35-2.25 Ma			48		THAA	0.779912	0.592848	0	0.756218	867.103	744.759	102.931	152.097	0	880.105	362.926	1340.06	97.4554	642.32	0	287.772	396.443	146.562	6020.53	14.4024	12.3703	1.70966	2.5263	0	14.6184	6.02814	22.2582	1.61872	10.6688	0	4.77985	6.58484	2.43436
21282	ArEw10bH*	16654bH*	Easton Wood	UK	52° 21.43' N	1° 41.52' E	Early Pleistocene 2.35-2.25 Ma			48		THAA	0.816073	0.6409	0	0.773866	474.914	443.34	12.2059	56.1493	0	356.052	155.873	644.088	0	316.718	0	118.838	153.244	66.5882	2798.01	16.9733	15.8448	0.436237	2.00676	0	12.7252	5.57085	23.0195	0	11.3194	0	4.24722	5.47688	2.37984
21282	ArEw11bH*	16655bH*	Easton Wood	UK	52° 21.43' N	1° 41.52' E	Early Pleistocene 2.35-2.25 Ma			48		THAA	0.795645	0.605425	0	0.727863	1446.86	1123.03	33.4415	182.642	0	1282.32	509.665	2423.79	45.099	1203.35	0	507.502	704.513	251.749	9713.96	14.8947	11.561	0.344262	1.8802	0	13.2008	5.24672	24.9516	0.46427	12.3878	0	5.22446	7.25258	2.59162
21282	ArEw12bH*	16656bH*	Easton Wood	UK	52° 21.43' N	1° 41.52' E	Early Pleistocene 2.35-2.25 Ma			48		THAA	0.762047	0.554728	0	0.760278	105.576	95.7692	33.3294	70.2315	0	247.507	129.03	565.868	60.465	277.619	0	101.533	137.168	79.8854	1903.98	5.54502	5.02994	1.75051	3.68866	0	12.9994	6.77688	29.7202	3.17571	14.581	0	5.33266	7.20429	4.1957
21282	ArEw13bH*	16657bH*	Easton Wood	UK	52° 21.43' N	1° 41.52' E	Early Pleistocene 2.35-2.25 Ma			48		THAA	0.811138	0.641926	0	0.762583	476.281	399.748	12.3504	69.6298	0	424.752	152.167	710.196	0	371.685	0	152.443	217.357	92.6757	3079.28	15.4673	12.9818	0.40108	2.26123	0	13.7938	4.94162	23.0637	0	12.0705	0	4.9506	7.05869	3.00965
21282	ArEw14bH*	16658bH*	Easton Wood	UK	52° 21.43' N	1° 41.52' E	Early Pleistocene 2.35-2.25 Ma			48		THAA	0.806798	0.630677	0	0.770533	620.677	512.575	25.9724	152.053	0	837.405	252.247	1670.79	144.085	911.424	0	290.898	386.666	157.495	5962.28	10.4101	8.59696	0.435611	2.55025	0	14.045	4.23072	28.0226	2.4166	15.2865	0	4.87897	6.48519	2.64152
21282	ArEw15bH*	16659bH*	Easton Wood	UK	52° 21.43' N	1° 41.52' E	Early Pleistocene 2.35-2.25 Ma			48		THAA	0.70441	0.474628	0	0.60873	388.317	392.049	171.419	139.81	0	495.246	236.965	900.366	0	471.912	0	179.342	266.747	96.0737	3738.25	10.3877	10.4875	4.58554	3.74	0	13.2481	6.33895	24.0853	0	12.6239	0	4.79748	7.13561	2.57002
21282	ArEw16bH*	16660bH*	Easton Wood	UK	52° 21.43' N	1° 41.52' E	Early Pleistocene 2.35-2.25 Ma			48		THAA	0.812587	0.655043	0	0.776439	578.846	447.599	13.8227	83.9427	0	624.951	236.113	1074.2	23.6869	570.578	0	222.036	322.375	150.769	4348.92	13.3101	10.2922	0.317842	1.9302	0	14.3703	5.42924	24.7003	0.544662	13.12	0	5.10555	7.41277	3.46682
21282	ArEw17bH*	16661bH*	Easton Wood	UK	52° 21.43' N	1° 41.52' E	Early Pleistocene 2.35-2.25 Ma			48		THAA	0.802589	0.632556	0	0.764333	517.355	427.648	14.8191	66.0298	0	425.424	155.463	730.207	0	408.087	0	156.351	222.066	112.132	3235.58	15.9896	13.217	0.458005	2.04074	0	13.1483	4.80478	22.568	0	12.6125	0	4.83224	6.86323	3.4656
21282	ArEw18bH*	16662bH*	Easton Wood	UK	52° 21.43' N	1° 41.52' E	Early Pleistocene 2.35-2.25 Ma			48		THAA	0.808224	0.615807	0	0.724194	393.141	334.955	10.574	58.8096	0	339.937	112.866	577.451	28.4678	323.67	0	137.37	163.532	81.3265	2562.1	15.3445	13.0735	0.412707	2.29537	0	13.2679	4.40522	22.5382	1.11111	12.633	0	5.36161	6.38274	3.17421
21282	ArEw19bH*	16663bH*	Easton Wood	UK	52° 21.43' N	1° 41.52' E	Early Pleistocene 2.35-2.25 Ma			48		THAA	0.827685	0.646438	0	0.773851	1256.99	1076.62	15.4788	130.627	0	837.808	181.537	1485.47	207.14	762.53	0	294.763	441.236	194.803	6885	18.2569	15.6372	0.22482	1.89727	0	12.1686	2.63671	21.5754	3.00857	11.0752	0	4.28124	6.40867	2.82939
21282	ArEw20bH*	16664bH*	Easton Wood	UK	52° 21.43' N	1° 41.52' E	Early Pleistocene 2.35-2.25 Ma			48		THAA	0.763701	0.587516	0	0.756013	423.752	325.148	17.8746	122.315	0	593.924	172.591	1202.13	128.665	657.483	0	236.042	329.702	145.402	4355.02	9.73018	7.46605	0.410436	2.80859	0	13.6377	3.96304	27.6032	2.95441	15.0971	0	5.42	7.57062	3.33871
21282	ArEw21bH*	16665bH*	Easton Wood	UK	52° 21.43' N	1° 41.52' E	Early Pleistocene 2.35-2.25 Ma			48		THAA	0.80803	0.648203	0	0.771589	423.219	283.151	16.0641	39.1669	0	354.863	122.471	601.032	0	334.073	0	141.876	168.943	92.3661	2577.22	16.4215	10.9867	0.623309	1.51973	0	13.7692	4.75205	23.3209	0	12.9625	0	5.50498	6.55522	3.58394
21282	ArEw22bH*	16666bH*	Easton Wood	UK	52° 21.43' N	1° 41.52' E	Early Pleistocene 2.35-2.25 Ma			48		THAA	0.821949	0.638957	0.458287	0.739421	1218.21	903.118	34.6962	81.043	0	734.694	245.824	1474.14	23.773	730.333	0	277.126	352.493	152.165	6227.61	19.5614	14.5018	0.557135	1.30135	0	11.7974	3.94733	23.671	0.381736	11.7273	0	4.44996	5.66016	2.44339
21282	ArEw23bH*	16667bH*	Easton Wood	UK	52° 21.43' N	1° 41.52' E	Early Pleistocene 2.35-2.25 Ma			48		THAA	0.786376	0.592687	0	0.745651	217.335	167.612	9.28694	20.9038	0	209.708	58.23	374.051	0	205.081	0	76.0219	90.6416	53.2512	1482.12	14.6638	11.3089	0.626597	1.4104	0	14.1492	3.92882	25.2375	0	13.837	0	5.12926	6.11566	3.5929
21282	ArEw24bH*	16668bH*	Easton Wood	UK	52° 21.43' N	1° 41.52' E	Early Pleistocene 2.35-2.25 Ma			48		THAA	0.597545	0.555743	0	0.742853	92.7661	79.7775	19.1806	23.9057	0	521.597	114.21	982.945	0	422.892	0	181.854	223.753	110.265	2773.15	3.34516	2.87678	0.691653	0.862043	0	18.8088	4.11843	35.4451	0	15.2495	0	6.55768	8.06858	3.97617
21280	ArCg1bH*	16236bH*	Capel Green Pit	UK	52° 4.41' N	1° 27.5' E	Late Pliocene / Early Pleistocene 3.6-2.12 Ma			48		THAA	0.871514	0.592335	0	0.77235	314.699	251.121	5.74149	12.5905	0	157.898	31.6298	312.155	0	182.434	0	56.9331	84.2515	40.0971	1449.55	21.7101	17.3241	0.396088	0.868579	0	10.8929	2.18204	21.5346	0	12.5856	0	3.92764	5.81225	2.76617
21280	ArCg2bH*	16237bH*	Capel Green Pit	UK	52° 4.41' N	1° 27.5' E	Late Pliocene / Early Pleistocene 3.6-2.12 Ma			48		THAA	0.881798	0.637898	#DIV/0!	0.864482	153.073	145.348	0	0	0	114.358	8.93439	171.767	0	92.436	0	25.5181	44.442	28.5495	784.426	19.514	18.5292	0	0	0	14.5786	1.13897	21.8971	0	11.7839	0	3.25309	5.66554	3.63954
21280	ArCg3bH*	16238bH*	Capel Green Pit	UK	52° 4.41' N	1° 27.5' E	Late Pliocene / Early Pleistocene 3.6-2.12 Ma			48		THAA	0.873801	0.661728	#DIV/0!	0.884339	157.257	161.771	0	13.8598	0	118.832	0	174.417	0	102.79	0	36.8163	53.2399	33.0052	851.989	18.4577	18.9875	0	1.62675	0	13.9476	0	20.4718	0	12.0648	0	4.32122	6.24889	3.8739
21281	ArAh1bH*	16239bH*	Alderton House pit	UK	52° 1.2' N	1° 23.24' E	Late Pliocene / Early Pleistocene 3.6-2.12 Ma			48		THAA	0.861771	0.608978	#DIV/0!	0.857413	165.827	161.546	0	6.57106	0	102.388	54.2897	235.683	5.07787	131.885	0	50.7501	55.1664	35.0197	1004.2	16.5133	16.087	0	0.654355	0	10.1959	5.40624	23.4697	0.505661	13.1332	0	5.05376	5.49354	3.4873
21281	ArAh2bH*	16240bH*	Alderton House pit	UK	52° 1.2' N	1° 23.24' E	Late Pliocene / Early Pleistocene 3.6-2.12 Ma			48		THAA	0.778858	0.595254	0	0.821822	73.7304	81.3886	6.67141	0	0	129.781	59.0099	132.14	0	77.8728	0	23.2523	36.6736	25.1966	645.717	11.4184	12.6044	1.03318	0	0	20.0987	9.13867	20.4642	0	12.0599	0	3.601	5.67953	3.90211
21281	ArAh3bH*	16241bH*	Alderton House pit	UK	52° 1.2' N	1° 23.24' E	Late Pliocene / Early Pleistocene 3.6-2.12 Ma			48		THAA	0.860113	0.64191	0	0.879622	132.796	135.399	5.9223	8.14739	0	129.117	78.0868	316.013	7.53009	183.683	0	81.0949	74.2502	42.9661	1195.01	11.1126	11.3304	0.495587	0.681787	0	10.8048	6.53443	26.4444	0.63013	15.3709	0	6.78615	6.21337	3.59547
21281	ArAh4bH*	16242bH*	Alderton House pit	UK	52° 1.2' N	1° 23.24' E	Late Pliocene / Early Pleistocene 3.6-2.12 Ma			48		THAA	0.879828	0.658153	0	0.839571	303.093	321.596	5.34997	10.0134	0	186.426	125.581	354.965	16.5627	246.076	0	106.468	130.858	63.6475	1870.63	16.2027	17.1918	0.285998	0.535293	0	9.9659	6.71326	18.9756	0.885406	13.1547	0	5.69155	6.99536	3.40245
21281	ArAh5bH*	16243bH*	Alderton House pit	UK	52° 1.2' N	1° 23.24' E	Late Pliocene / Early Pleistocene 3.6-2.12 Ma			48		THAA	0.889444	0.564984	#DIV/0!	0.847952	69.93	82.59	0	0	0	67.6372	24.3748	156.767	0	80.451	0	29.3945	35.9194	25.0469	572.11	12.2232	14.436	0	0	0	11.8224	4.26051	27.4015	0	14.0621	0	5.1379	6.2784	4.37798
21281	ArAh6bH*	16244bH*	Alderton House pit	UK	52° 1.2' N	1° 23.24' E	Late Pliocene / Early Pleistocene 3.6-2.12 Ma			48		THAA	0.888252	0.686875	0	0.843325	173.114	220.472	4.19098	7.48373	0	218.966	74.7763	325.17	5.33074	177.046	0	73.6646	115.426	50.9514	1446.59	11.967	15.2408	0.289714	0.517336	0	15.1367	5.16914	22.4784	0.368504	12.2388	0	5.09229	7.97916	3.52217
														FAA	Average values	Age	[Asx]	[Glx]	[Ser]	[Thr]	[His]	[Gly]	[Arg]	[Ala]	[Tyr]	[Val]	[Met]	[Phe]	[Leu]	[Ile]	Total concentration	% Asx	% Glx	% Ser	% Thr	% His	% Gly	% Arg	% Ala	% Tyr	% Val	% Met	%Phe	% Ile	% Leu
																Modern	7.84667	3.5218	9.63125	3.41282	0	23.9446	7.74872	5.70836	0.19433	0.679858	0	0.345726	0.184787	0.579085	63.798	12.2581	5.2941	15.9234	5.15977	0	39.757	12.3346	7.48657	0.154022	0.650019	0	0.295099	0.146458	0.540951
																Post-medieval	10.6706	6.4818	13.267	4.6022	0	33.4997	9.97357	10.1745	0	0	0	0	0	0	88.6693	11.9103	7.04712	15.7506	5.4434	0	37.3339	10.9322	11.5824	0	0	0	0	0	0
																Late Holocene	21.9756	10.7846	37.5881	15.542	0	54.2835	10.045	25.8188	0	4.17569	0	1.69521	2.00034	0	183.909	11.3363	5.77756	20.7077	8.56514	0	30.1407	5.43123	14.2811	0	2.21676	0	0.709331	0.834151	0
																Middle Holocene	72.7	30.7365	55.4879	35.2341	0.236826	86.8455	40.9936	81.5056	1.65021	27.3323	0.435	12.5203	13.1291	13.4928	472.3	15.486	6.56087	11.6048	7.3731	0.0383266	18.5724	8.67718	17.158	0.310405	5.77538	0.0870784	2.67296	2.73608	2.94743
																Early Pleistocene 2.2-2.1 Ma	258.457	91.384	5.37644	9.90293	6.69493	179.668	106.175	303.429	27.8502	139.665	6.91139	48.2983	45.5599	7.77508	1237.15	19.9944	6.90929	0.46073	0.821422	0.405528	14.0535	9.27105	25.3532	2.16688	11.7771	0.41864	3.98605	3.66165	0.720588
																Early Pleistocene 2.35-2.25 Ma	110.881	31.6464	0	31.4763	0	209.136	68.8379	364.925	31.6935	172.256	0	55.631	89.1659	43.6222	1209.27	9.98157	2.99669	0	2.32198	0	17.7156	5.35175	30.0375	1.8841	14.034	0	4.69432	7.08329	3.89917
																Late Pliocene / Early Pleistocene 3.6-2.12 Ma	167.296	48.4859	0	0.761455	0	112.431	35.7324	236.593	5.21873	113.308	0	34.5332	55.5354	34.9363	844.831	19.0651	5.66312	0	0.069505	0	12.9775	4.98901	28.3582	0.694997	13.3748	0	4.10211	6.44643	4.25917
														FAA	Average standard deviation	Age	[Asx] 1 σ	[Glx] 1 σ	[Ser] 1 σ	[Thr] 1 σ	[His] 1 σ	[Gly] 1 σ	[Arg] 1 σ	[Ala] 1 σ	[Tyr] 1 σ	[Val] 1 σ	[Met] 1 σ	[Phe] 1 σ	[Leu] 1 σ	[Ile] 1 σ	Total concentration 1 σ	% Asx 1 σ	% Glx 1 σ	% Ser 1 σ	% Thr 1 σ	% His 1 σ	% Gly 1 σ	% Arg 1 σ	% Ala 1 σ	% Tyr 1 σ	% Val 1 σ	% Met 1 σ	%Phe 1 σ	% Ile 1 σ	% Leu 1 σ
																Modern	3.55025	1.92718	4.4675	2.02802	0	7.17676	3.90731	5.35312	0.777321	1.6385	0	0.957037	0.739146	2.31634	25.4541	3.57652	1.75025	5.26845	3.12586	0	8.51717	6.38308	5.58657	0.616088	1.56624	0	0.809653	0.585831	2.1638
																Post-medieval	4.03863	3.07768	2.53698	0.937811	0	14.0684	4.67868	3.52662	0	0	0	0	0	0	31.0045	1.38493	1.28319	2.70738	0.95065	0	3.84322	2.22792	1.34138	0	0	0	0	0	0
																Late Holocene	10.2961	3.52529	8.38475	3.37716	0	10.5454	3.08209	5.26789	0	2.6062	0	2.0851	2.47456	0	48.7906	3.04448	0.647184	2.10756	0.700418	0	2.8802	0.748152	1.19406	0	1.17673	0	0.868953	1.02203	0
																Middle Holocene	19.6839	7.29945	16.7997	10.8253	0.917224	26.9414	13.5371	23.5872	3.29013	8.71257	1.15271	4.32293	6.02233	2.51614	114.784	2.19036	0.620118	0.796729	0.705325	0.148438	4.05117	1.83511	1.96539	0.583206	0.990484	0.234112	0.639442	0.94977	0.572914
																Early Pleistocene 2.2-2.1 Ma	115.912	46.2468	0.93919	2.62355	6.69493	75.508	12.8808	74.3204	12.0835	30.6857	6.91139	13.4581	15.928	0.42597	413.766	2.68214	1.42735	0.0781763	0.0626618	0.405528	1.40319	2.05955	2.47204	0.252006	1.45852	0.41864	0.245312	0.0628301	0.275433
																Early Pleistocene 2.35-2.25 Ma	71.6729	17.4742	0	18.563	0	95.0823	35.3947	166.077	37.9662	81.2691	0	24.4008	43.7067	17.2362	565.32	4.03201	1.38065	0	1.04555	0	1.87849	1.43421	2.68348	2.05421	1.49163	0	0.342079	1.26725	0.728958
																Late Pliocene / Early Pleistocene 3.6-2.12 Ma	67.9905	17.1581	0	2.15372	0	42.2126	35.9048	73.0226	2.32572	38.5171	0	13.1375	22.5379	9.76434	266.617	3.4851	0.730682	0	0.19659	0	1.64552	4.9342	3.63879	0.392951	0.720087	0	0.673553	0.815265	0.571688
														THAA	Average values	Age	[Asx]	[Glx]	[Ser]	[Thr]	[His]	[Gly]	[Arg]	[Ala]	[Tyr]	[Val]	[Met]	[Phe]	[Leu]	[Ile]	Total concentration	% Asx	% Glx	% Ser	% Thr	% His	% Gly	% Arg	% Ala	% Tyr	% Val	% Met	%Phe	% Ile	% Leu
																Modern	294.74	185.654	136.633	177.7	30.9946	222.945	190.995	230.119	41.8047	170.144	7.84758	76.6888	91.2149	17.3597	1874.84	15.7632	9.88786	7.19279	9.15614	1.49642	11.8628	10.2187	12.9252	1.94721	9.20462	0.408854	4.02949	4.85448	1.05226
																Post-medieval	397.315	276.46	132.655	174.911	35.2721	246.288	183.808	234.14	32.1851	196.496	11.5552	77.5835	84.5531	16.8359	2100.06	18.8767	13.2175	6.2259	8.24595	1.48949	11.7561	8.83941	11.6008	1.36162	9.3304	0.544775	3.64893	4.00556	0.856916
																Late Holocene	645.609	445.197	250.179	253.873	28.0247	474.361	324.659	377.11	17.1765	132.93	24.7809	99.2576	133.895	17.3027	3224.36	19.454	13.6329	7.84024	7.76185	0.833264	14.6916	8.31584	12.3561	0.691076	6.12852	0.602249	2.69614	4.40937	0.586711
																Middle Holocene	400.116	301.733	135.149	164.405	26.1467	229.514	201.39	286.024	36.1879	209.815	1.33419	82.4182	165.133	32.6515	2272.02	17.8292	13.11	6.09229	7.40357	1.26889	10.5526	9.08299	12.9807	1.46563	9.48807	0.0861795	3.68937	5.38004	1.57047
																Early Pleistocene 2.2-2.1 Ma	217.061	224.07	33.0202	205.714	11.9357	216.686	179.712	382.428	11.0588	226.469	45.9586	95.0391	88.6454	8.52256	1946.32	11.8325	12.1051	1.72923	9.82851	0.51239	10.9206	9.17491	19.5446	0.563613	11.5708	2.46627	4.85529	4.44068	0.455425
																Early Pleistocene 2.35-2.25 Ma	576.617	472.923	21.1587	78.2797	0	538.197	180.526	967.653	41.2869	497.976	0	192.601	263.748	115.195	3946.16	13.914	11.4293	0.557051	2.05718	0	14.0309	4.69841	24.7743	0.943108	12.9641	0	4.88204	6.62531	3.12426
																Late Pliocene / Early Pleistocene 3.6-2.12 Ma	171.502	173.47	3.09735	6.51842	0	136.156	50.7425	242.12	3.83349	141.63	0	53.7658	70.0252	38.2755	1091.14	15.4577	15.7479	0.277841	0.542678	0	13.0493	4.50481	22.5708	0.265522	12.9393	0	4.76273	6.26289	3.61857
														THAA	Average standard deviation	Age	[Asx] 1 σ	[Glx] 1 σ	[Ser] 1 σ	[Thr] 1 σ	[His] 1 σ	[Gly] 1 σ	[Arg] 1 σ	[Ala] 1 σ	[Tyr] 1 σ	[Val] 1 σ	[Met] 1 σ	[Phe] 1 σ	[Leu] 1 σ	[Ile] 1 σ	Total concentration 1 σ	% Asx 1 σ	% Glx 1 σ	% Ser 1 σ	% Thr 1 σ	% His 1 σ	% Gly 1 σ	% Arg 1 σ	% Ala 1 σ	% Tyr 1 σ	% Val 1 σ	% Met 1 σ	%Phe 1 σ	% Ile 1 σ	% Leu 1 σ
																Modern	114.06	75.1352	50.2941	79.295	24.9669	84.8541	72.63	46.3858	52.9178	68.905	16.9737	29.6801	31.9238	8.50483	1580.53	3.12719	2.31585	0.733029	1.81833	1.05486	2.50599	1.96738	2.59382	1.9913	2.21952	0.937515	0.591674	0.635912	0.636046
																Post-medieval	136.423	87.1653	51.9448	64.2927	25.0052	88.9908	53.3021	53.5546	23.1598	66.9725	12.4236	28.4794	29.8305	8.02757	689.443	0.742726	0.297572	0.452434	0.641868	0.843203	2.12508	1.01566	1.88275	0.674115	0.405021	0.578404	0.241536	0.226665	0.413112
																Late Holocene	619.41	418.127	225.642	239.3	28.4915	450.922	390.422	320.945	14.2285	55.3612	30.6964	110.827	111.938	16.3749	2962.23	0.650574	0.921077	0.439586	0.394011	0.157637	1.25376	2.09874	1.58837	0.528154	2.38764	0.931481	0.828712	0.620966	0.190902
																Middle Holocene	183.995	155.581	63.4737	74.1151	19.0934	94.7949	86.6016	126.795	56.4715	92.9029	5.16728	38.6932	319.573	10.3764	1155.31	1.91042	1.73168	0.744559	0.758462	0.889315	2.20928	1.09518	1.60486	2.04907	0.797997	0.333772	0.312588	5.39656	0.384487
																Early Pleistocene 2.2-2.1 Ma	21.9259	12.2247	3.39275	110.914	11.9357	62.8463	40.9367	85.1707	2.61197	50.7487	0.930907	21.3423	28.2682	0.00990518	383.096	3.45554	3.01075	0.16605	3.76411	0.51239	1.07946	0.29738	0.529	0.0232642	0.329928	0.533268	0.140877	0.578327	0.0891327
																Early Pleistocene 2.35-2.25 Ma	397.283	324.883	20.7865	46.3897	0	291.315	108.288	557.219	58.1513	271.526	0	112.919	158.006	54.3533	2277.45	3.4438	2.96272	0.321453	0.590348	0	1.58734	0.824591	2.29022	1.13536	1.50579	0	0.378487	0.830033	0.51826
																Late Pliocene / Early Pleistocene 3.6-2.12 Ma	81.4952	74.1152	2.83608	5.09943	0	42.8923	37.1039	80.9332	5.30164	55.2047	0	26.9769	32.343	12.0589	408.224	3.71272	2.45604	0.323337	0.494127	0	3.09191	2.76486	2.63426	0.322831	1.09272	0	1.04413	0.743648	0.411376
