# Supplementary material for: A new method for amino acid geochronology of the shell of the bivalve mollusc Arctica islandica
Source: Copernicus journal article supplement (doi:10.5194/gchron-6-175-2024), 2024-05-23
Supplement: Supplementary file 2 [file gchron-6-175-2024-supplement.zip]

Fig. S8

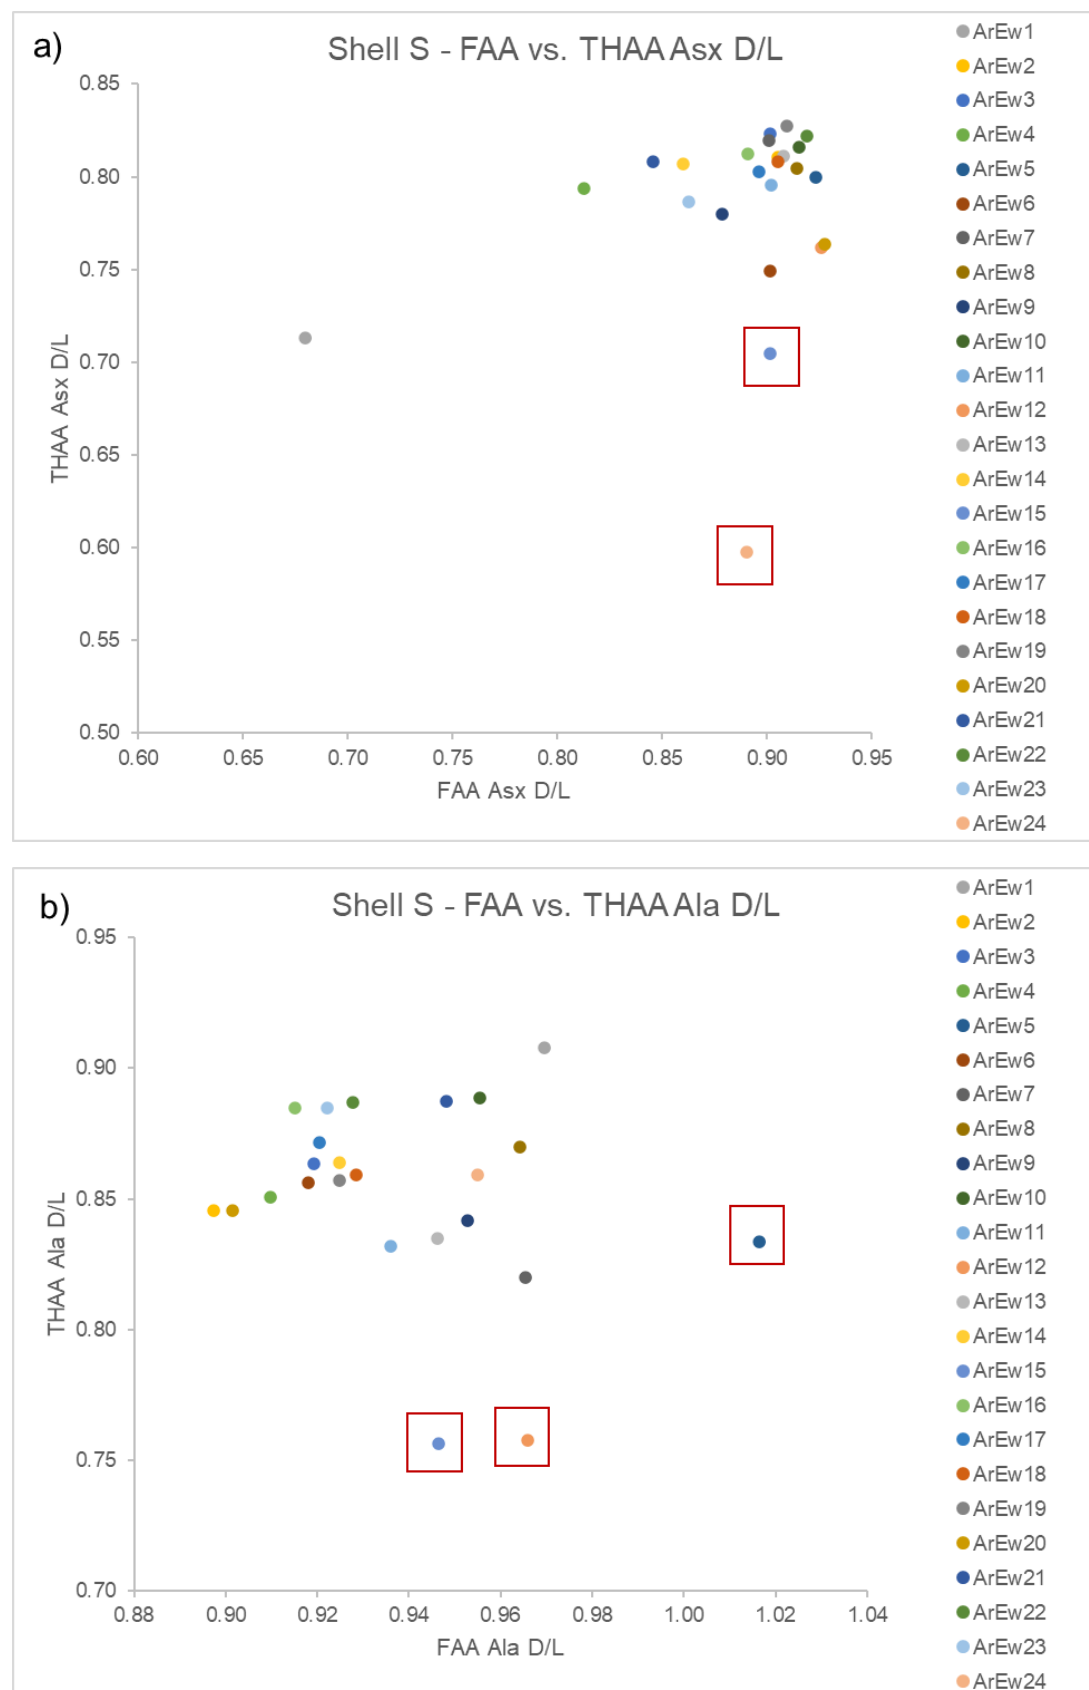

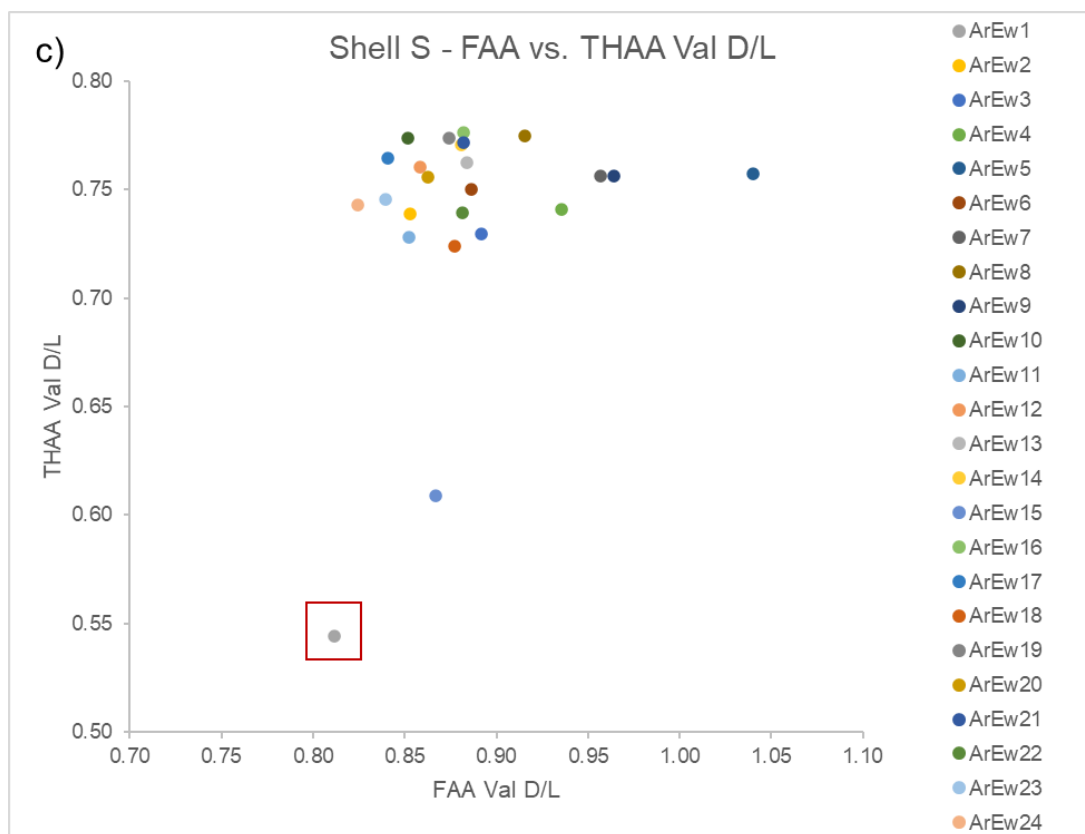

Figure S8. a) FAA vs. THAA Asx D/L; b) FAA vs. THAA Ala D/L; c) FAA vs. THAA Val D/L of Early Pleistocene *A. islandica* shells from Easton Wood (UK, shell S). The red boxes indicate shells that may not follow closed-system behaviour and that have been removed from the framework (Sect. 3.6).
