# Supplementary material for: A new method for amino acid geochronology of the shell of the bivalve mollusc Arctica islandica
Source: Copernicus journal article supplement (doi:10.5194/gchron-6-175-2024), 2024-05-23
Supplement: Supplementary file 3 [file gchron-6-175-2024-supplement.zip]

**Fig. S2**

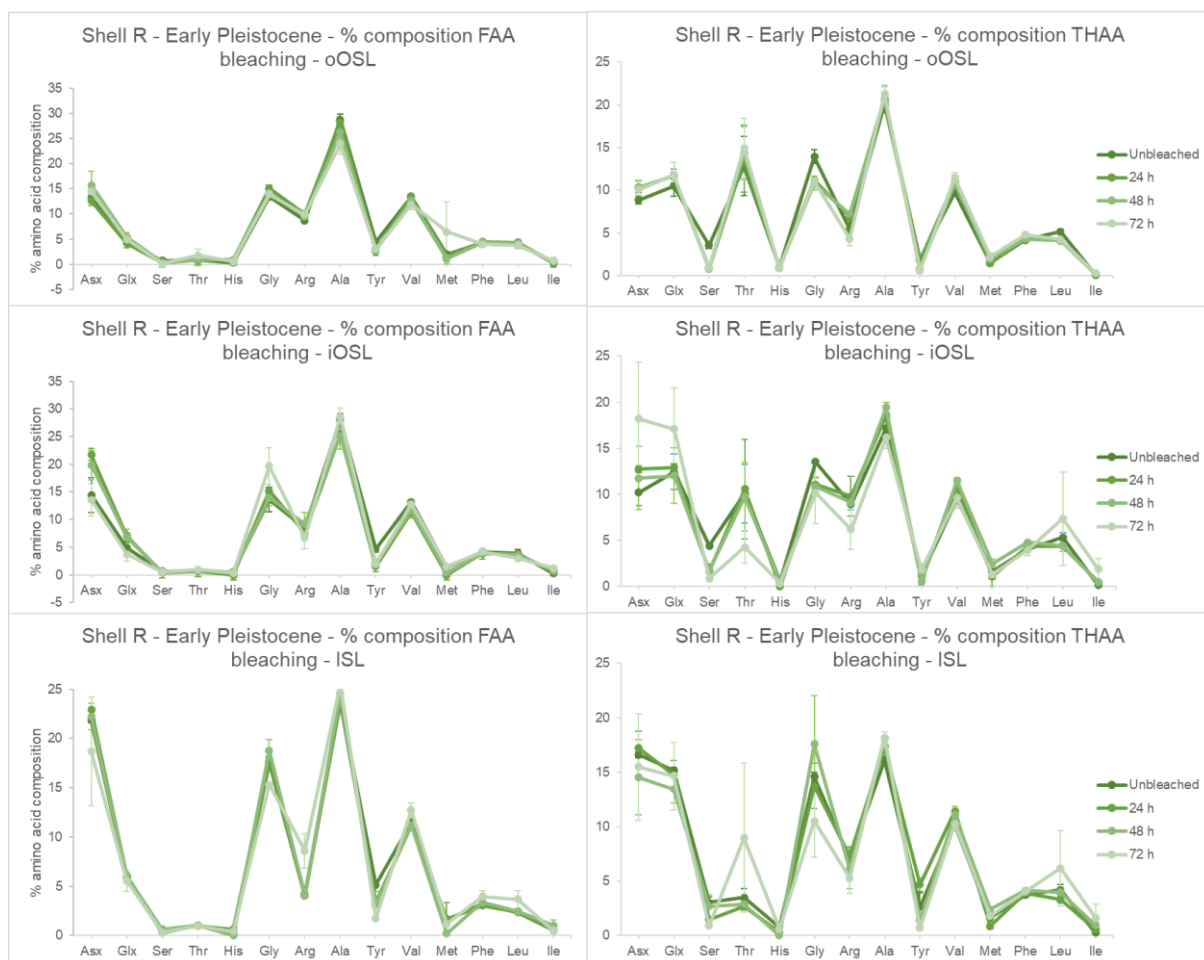

Fig. S2. Amino acid composition changes with bleaching of the three layers of Early Pleistocene *A. islandica* from Weybourne Crag (shell R). Error bars indicate one standard deviation based on two replicates
