# Supplementary material for: A new method for amino acid geochronology of the shell of the bivalve mollusc Arctica islandica
Source: Copernicus journal article supplement (doi:10.5194/gchron-6-175-2024), 2024-05-23
Supplement: Supplementary file 7 [file gchron-6-175-2024-supplement.zip]

**Fig. S7**

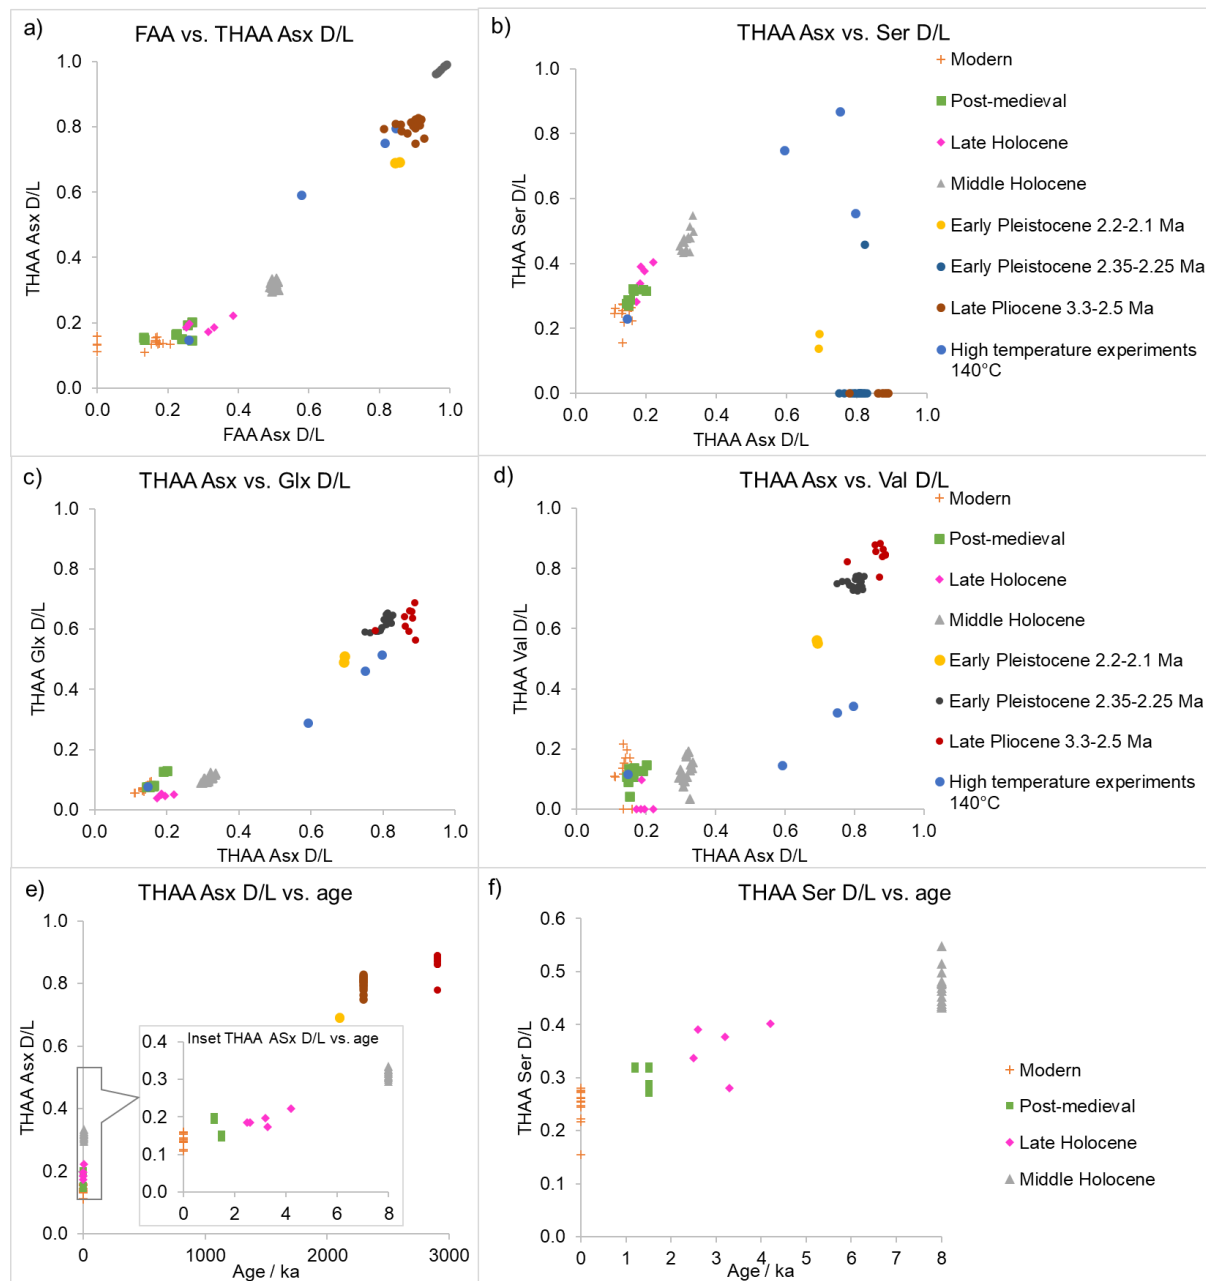

Fig. S7. a) FAA vs. THAA Asx D/L; b) THAA Asx vs. Ser D/L; c) THAA Asx vs. Glx D/L; d) THAA Asx vs. Val D/L; e) THAA Asx D/L vs. age and inset focusing on the last 8 ka; f) THAA Ser D/L vs. age of modern, post-medieval, Late Holocene, Middle Holocene, Early Pleistocene and Late Pliocene *A. islandica* shells. The D/L values of the high temperature experiments at 140°C are also overlaid.
