# Supplementary material for: A new method for amino acid geochronology of the shell of the bivalve mollusc Arctica islandica
Source: Copernicus journal article supplement (doi:10.5194/gchron-6-175-2024), 2024-05-23
Supplement: Supplementary file 10 [file gchron-6-175-2024-supplement.zip]

**Fig. S6**

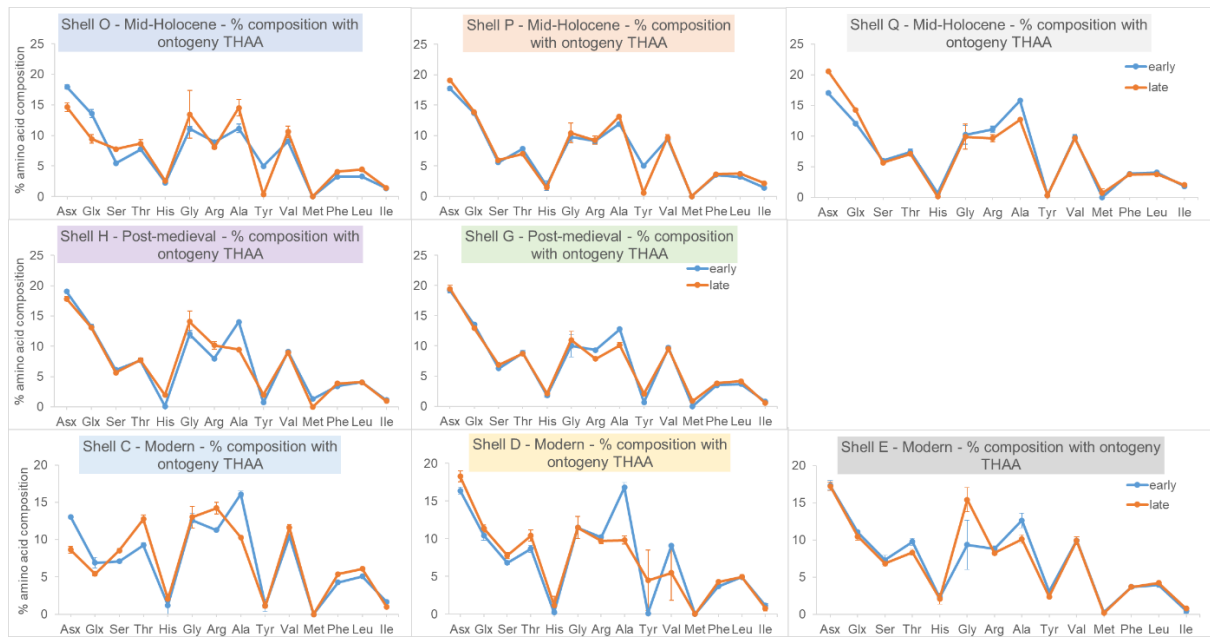

**Fig. S6.** Percentage composition of amino acids in three North Sea Mid-Holocene shells (top row, shells O, P, Q), Icelandic post-medieval shells (middle row, shells G, H) and modern North Sea shells (bottom row, shells C, D, E). Error bars indicate one standard deviation based on two analytical replicates.
